# Supplementary material for: Tricyclic Diterpenoids Selectively Suppress Androgen Receptor-Positive Prostate Cancer Cells
Source: MDPI journal article supplement (doi:10.3390/molecules28124743), 2023-06-13

## Tricyclic Diterpenoids Selectively Suppress Androgen Receptor-Positive Prostate Cancer Cells

Inderpal Sekhon <sup>1</sup>, Guanglin Chen <sup>1</sup>, Keyara Piri <sup>1</sup>, Seiji Shinkawa <sup>1</sup>, Dennis Ashong <sup>1</sup>, Qiang Zhang <sup>2</sup>, Guangdi Wang <sup>2</sup> and Qiao-Hong Chen <sup>1,\*</sup>

<sup>1</sup> Department of Chemistry & Biochemistry, California State University, Fresno, CA 93740, USA; inderpal@mail.fresnostate.edu (I.S.); chen.bmc@gmail.com (G.C.); piri\_keyara@mail.fresnostate.edu (K.P.); sashinkawa8@mail.fresnostate.edu (S.S.); dashong@mail.fresnostate.edu (D.A.)

<sup>2</sup> Department of Chemistry and RCMI Cancer Research Center, Xavier University of Louisiana, New Orleans, LA 70125, USA; qzhang1@xula.edu (Q.Z.); gwang@xula.edu (G.W.)

\* Correspondence: qchen@csufresno.edu; Tel: +1-559-278-2394

### List of Contents:

|                                                                                         |     |
|-----------------------------------------------------------------------------------------|-----|
| <b>Figure S1:</b> <sup>1</sup> H NMR spectrum of <b>5</b> in CDCl <sub>3</sub> .....    | S4  |
| <b>Figure S2:</b> <sup>13</sup> C NMR spectrum of <b>5</b> in CDCl <sub>3</sub> .....   | S5  |
| <b>Figure S3:</b> High resolution mass spectrum of <b>5</b> .....                       | S6  |
| <b>Figure S4:</b> <sup>1</sup> H NMR spectrum of <b>6</b> in CDCl <sub>3</sub> .....    | S7  |
| <b>Figure S5:</b> <sup>13</sup> C NMR spectrum of <b>6</b> in CDCl <sub>3</sub> .....   | S8  |
| <b>Figure S6:</b> High resolution mass spectrum of <b>6</b> .....                       | S9  |
| <b>Figure S7:</b> <sup>1</sup> H NMR spectrum of <b>7</b> in CDCl <sub>3</sub> .....    | S10 |
| <b>Figure S8:</b> <sup>13</sup> C NMR spectrum of <b>7</b> in CDCl <sub>3</sub> .....   | S11 |
| <b>Figure S9:</b> High resolution mass spectrum of <b>7</b> .....                       | S12 |
| <b>Figure S10:</b> <sup>1</sup> H NMR spectrum of <b>8</b> in CDCl <sub>3</sub> .....   | S13 |
| <b>Figure S11:</b> <sup>13</sup> C NMR spectrum of <b>8</b> in CDCl <sub>3</sub> .....  | S14 |
| <b>Figure S12:</b> High resolution mass spectrum of <b>8</b> .....                      | S15 |
| <b>Figure S13:</b> <sup>1</sup> H NMR spectrum of <b>9</b> in CDCl <sub>3</sub> .....   | S16 |
| <b>Figure S14:</b> <sup>13</sup> C NMR spectrum of <b>9</b> in CDCl <sub>3</sub> .....  | S17 |
| <b>Figure S15:</b> High resolution mass spectrum of <b>9</b> .....                      | S18 |
| <b>Figure S16:</b> <sup>1</sup> H NMR spectrum of <b>10</b> in CDCl <sub>3</sub> .....  | S19 |
| <b>Figure S17:</b> <sup>13</sup> C NMR spectrum of <b>10</b> in CDCl <sub>3</sub> ..... | S20 |
| <b>Figure S18:</b> High resolution mass spectrum of <b>10</b> .....                     | S21 |
| <b>Figure S19:</b> <sup>1</sup> H NMR spectrum of <b>11</b> in CDCl <sub>3</sub> .....  | S22 |
| <b>Figure S20:</b> <sup>13</sup> C NMR spectrum of <b>11</b> in CDCl <sub>3</sub> ..... | S23 |

|                                                                                  |     |
|----------------------------------------------------------------------------------|-----|
| Figure S21: High resolution mass spectrum of <b>11</b> .....                     | S24 |
| Figure S22: <sup>1</sup> H NMR spectrum of <b>12</b> in CDCl <sub>3</sub> .....  | S25 |
| Figure S23: <sup>13</sup> C NMR spectrum of <b>12</b> in CDCl <sub>3</sub> ..... | S26 |
| Figure S24: High resolution mass spectrum of <b>12</b> .....                     | S27 |
| Figure S25: <sup>1</sup> H NMR spectrum of <b>13</b> in CDCl <sub>3</sub> .....  | S28 |
| Figure S26: <sup>13</sup> C NMR spectrum of <b>13</b> in CDCl <sub>3</sub> ..... | S29 |
| Figure S27: High resolution mass spectrum of <b>13</b> .....                     | S30 |
| Figure S28: <sup>1</sup> H NMR spectrum of <b>14</b> in CDCl <sub>3</sub> .....  | S31 |
| Figure S29: <sup>13</sup> C NMR spectrum of <b>14</b> in CDCl <sub>3</sub> ..... | S32 |
| Figure S30: High resolution mass spectrum of <b>14</b> .....                     | S33 |
| Figure S31: <sup>1</sup> H NMR spectrum of <b>15</b> in CDCl <sub>3</sub> .....  | S34 |
| Figure S32: <sup>13</sup> C NMR spectrum of <b>15</b> in CDCl <sub>3</sub> ..... | S35 |
| Figure S33: High resolution mass spectrum of <b>15</b> .....                     | S36 |
| Figure S34: <sup>1</sup> H NMR spectrum of <b>16</b> in CDCl <sub>3</sub> .....  | S37 |
| Figure S35: <sup>13</sup> C NMR spectrum of <b>16</b> in CDCl <sub>3</sub> ..... | S38 |
| Figure S36: High resolution mass spectrum of <b>16</b> .....                     | S39 |
| Figure S37: <sup>1</sup> H NMR spectrum of <b>17</b> in CDCl <sub>3</sub> .....  | S40 |
| Figure S38: <sup>13</sup> C NMR spectrum of <b>17</b> in CDCl <sub>3</sub> ..... | S41 |
| Figure S39: High resolution mass spectrum of <b>17</b> .....                     | S42 |
| Figure S40: <sup>1</sup> H NMR spectrum of <b>18</b> in CDCl <sub>3</sub> .....  | S43 |
| Figure S41: <sup>13</sup> C NMR spectrum of <b>18</b> in CDCl <sub>3</sub> ..... | S44 |
| Figure S42: High resolution mass spectrum of <b>18</b> .....                     | S45 |
| Figure S43: <sup>1</sup> H NMR spectrum of <b>19</b> in CDCl <sub>3</sub> .....  | S46 |
| Figure S44: <sup>13</sup> C NMR spectrum of <b>19</b> in CDCl <sub>3</sub> ..... | S47 |
| Figure S45: High resolution mass spectrum of <b>19</b> .....                     | S48 |
| Figure S46: <sup>1</sup> H NMR spectrum of <b>20</b> in CDCl <sub>3</sub> .....  | S49 |
| Figure S47: <sup>13</sup> C NMR spectrum of <b>20</b> in CDCl <sub>3</sub> ..... | S50 |
| Figure S48: High resolution mass spectrum of <b>20</b> .....                     | S51 |
| Figure S49: <sup>1</sup> H NMR spectrum of <b>21</b> in CDCl <sub>3</sub> .....  | S52 |
| Figure S50: <sup>13</sup> C NMR spectrum of <b>21</b> in CDCl <sub>3</sub> ..... | S53 |
| Figure S51: High resolution mass spectrum of <b>21</b> .....                     | S54 |
| Figure S52: <sup>1</sup> H NMR spectrum of <b>22</b> in CDCl <sub>3</sub> .....  | S55 |
| Figure S53: <sup>13</sup> C NMR spectrum of <b>22</b> in CDCl <sub>3</sub> ..... | S56 |
| Figure S54: High resolution mass spectrum of <b>22</b> .....                     | S57 |
| Figure S55: <sup>1</sup> H NMR spectrum of <b>23</b> in CDCl <sub>3</sub> .....  | S58 |
| Figure S56: <sup>13</sup> C NMR spectrum of <b>23</b> in CDCl <sub>3</sub> ..... | S59 |

|                                                                                       |     |
|---------------------------------------------------------------------------------------|-----|
| <b>Figure S57:</b> High resolution mass spectrum of <b>23</b> .....                   | S60 |
| <b>Figure S58:</b> $^1\text{H}$ NMR spectrum of <b>24</b> in $\text{CDCl}_3$ .....    | S61 |
| <b>Figure S59:</b> $^{13}\text{C}$ NMR spectrum of <b>24</b> in $\text{CDCl}_3$ ..... | S62 |
| <b>Figure S60:</b> High resolution mass spectrum of <b>24</b> .....                   | S63 |

7.260  
7.206  
7.179  
7.034  
7.007  
6.916

2.975  
2.915  
2.850  
2.804

2.352  
2.292  
2.258

1.956

1.781  
1.715

1.606  
1.576

1.519

1.309  
1.261  
1.245  
1.238

**Figure S1:**  $^1\text{H}$  NMR spectrum of **5** in  $\text{CDCl}_3$

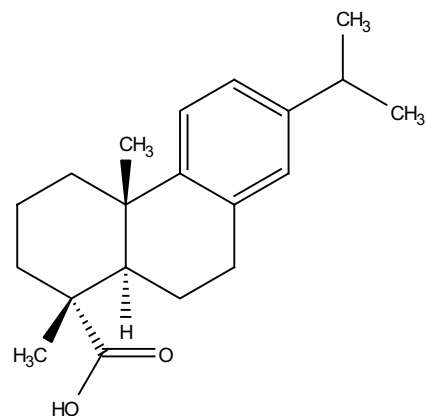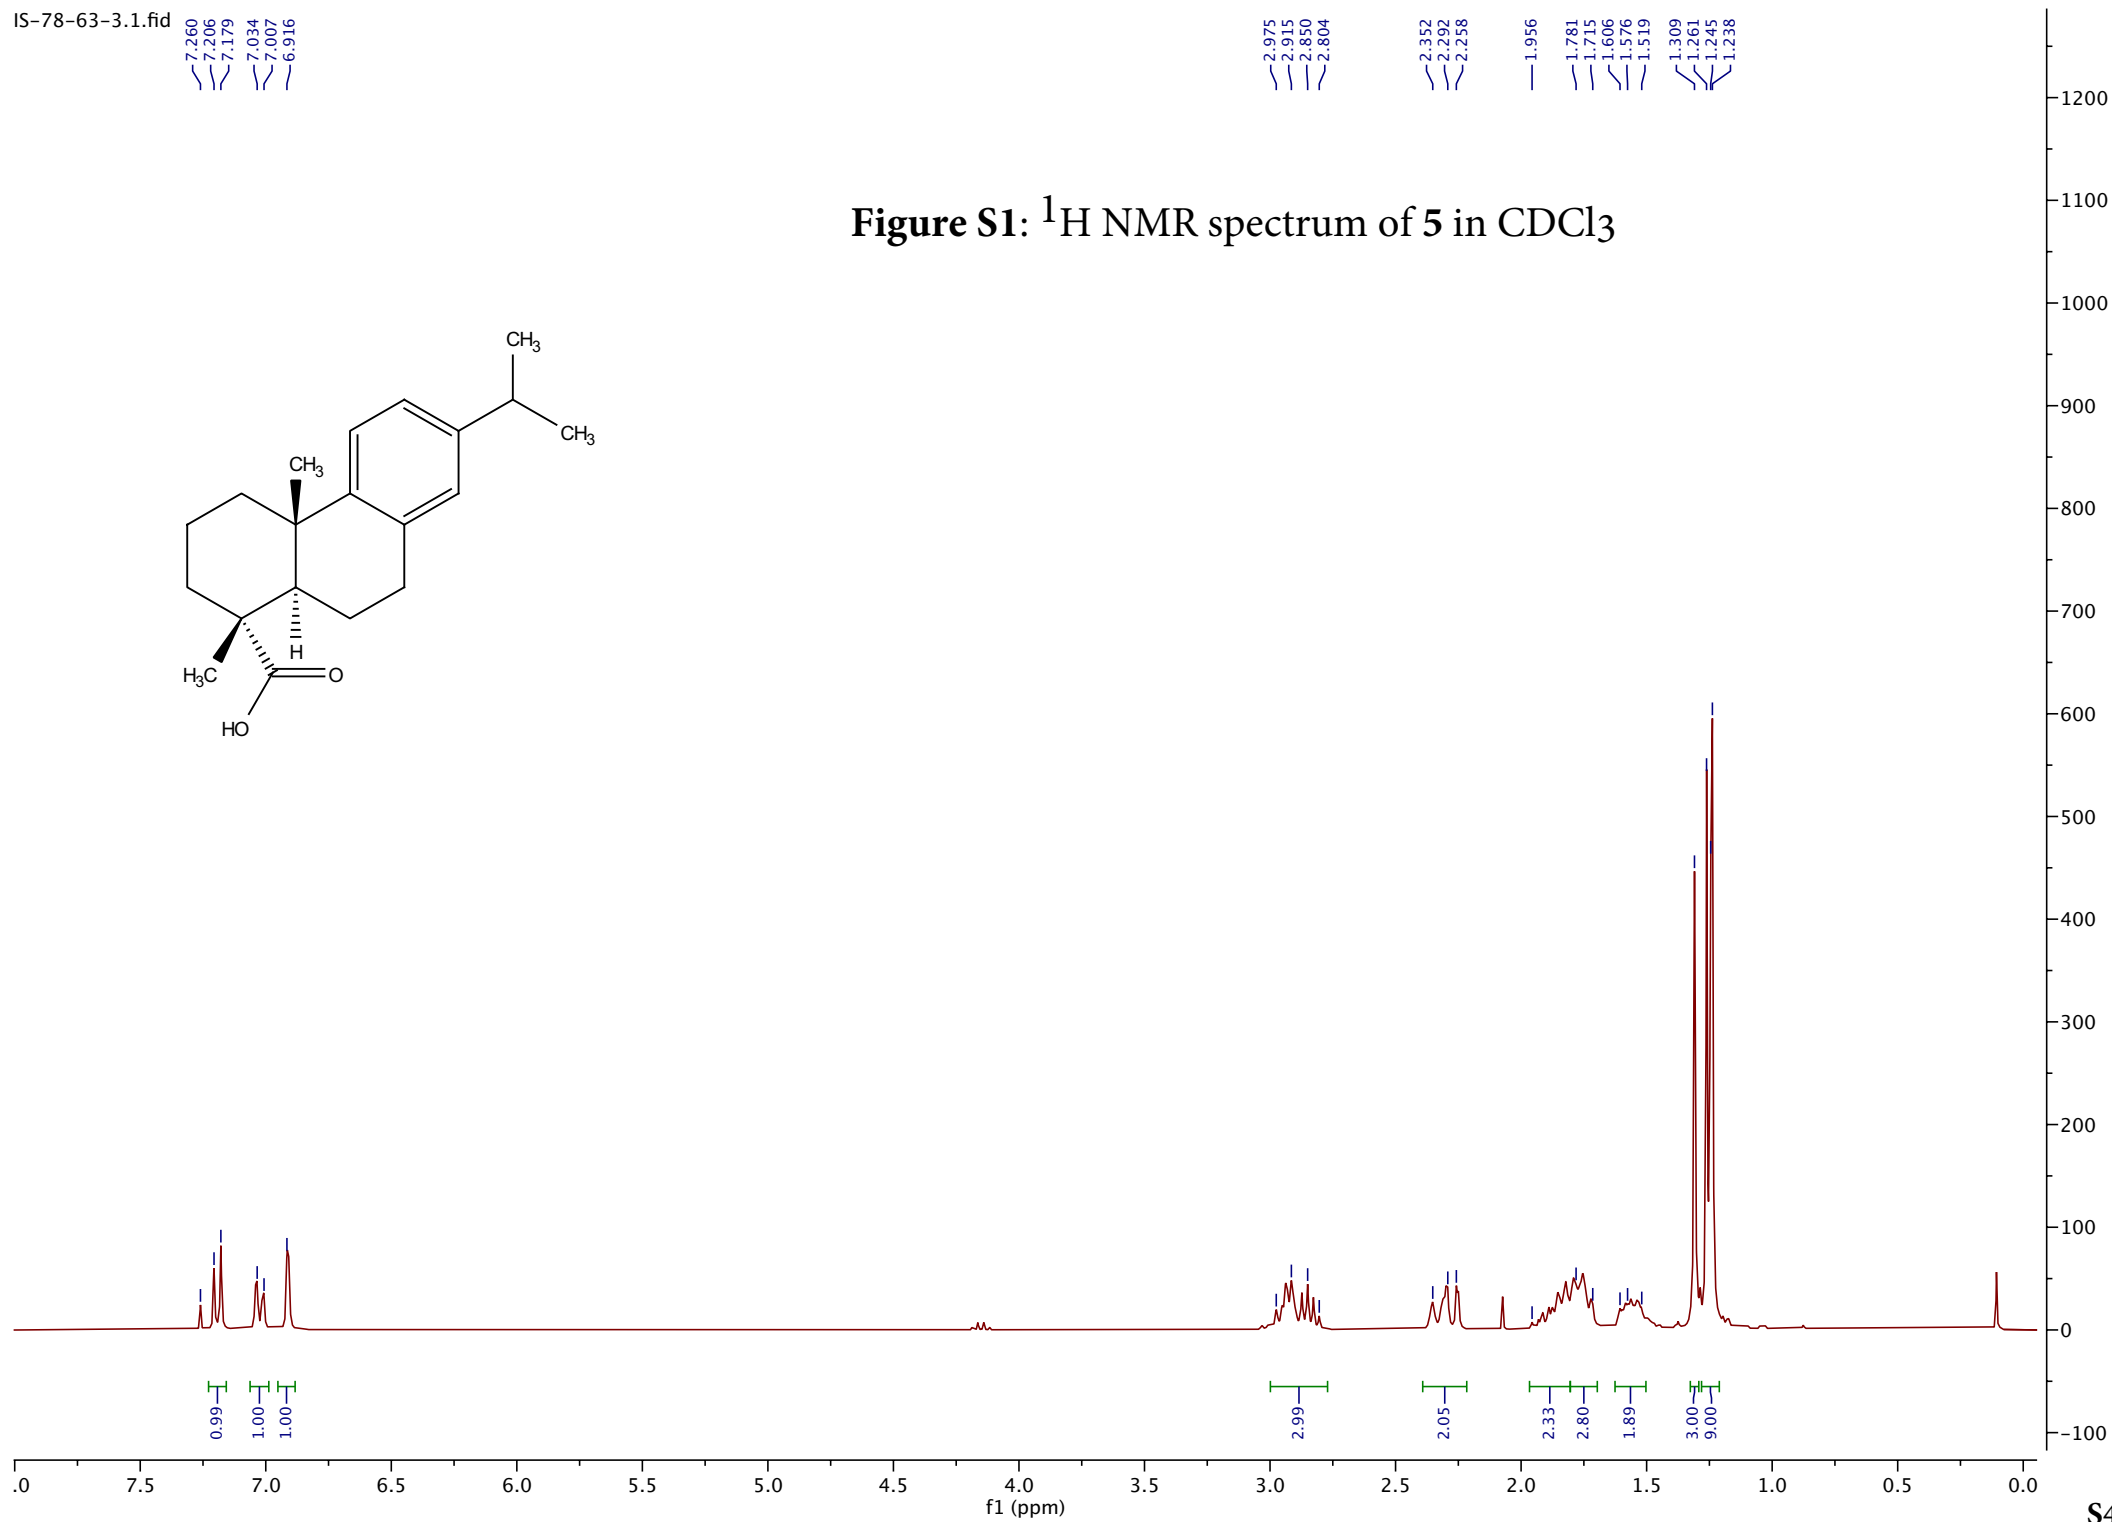

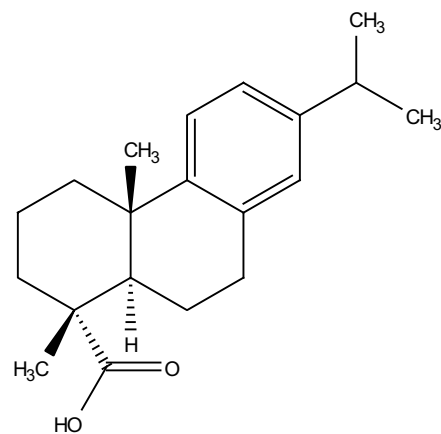

Figure S2: <sup>13</sup>C NMR spectrum of 5 in CDCl<sub>3</sub>

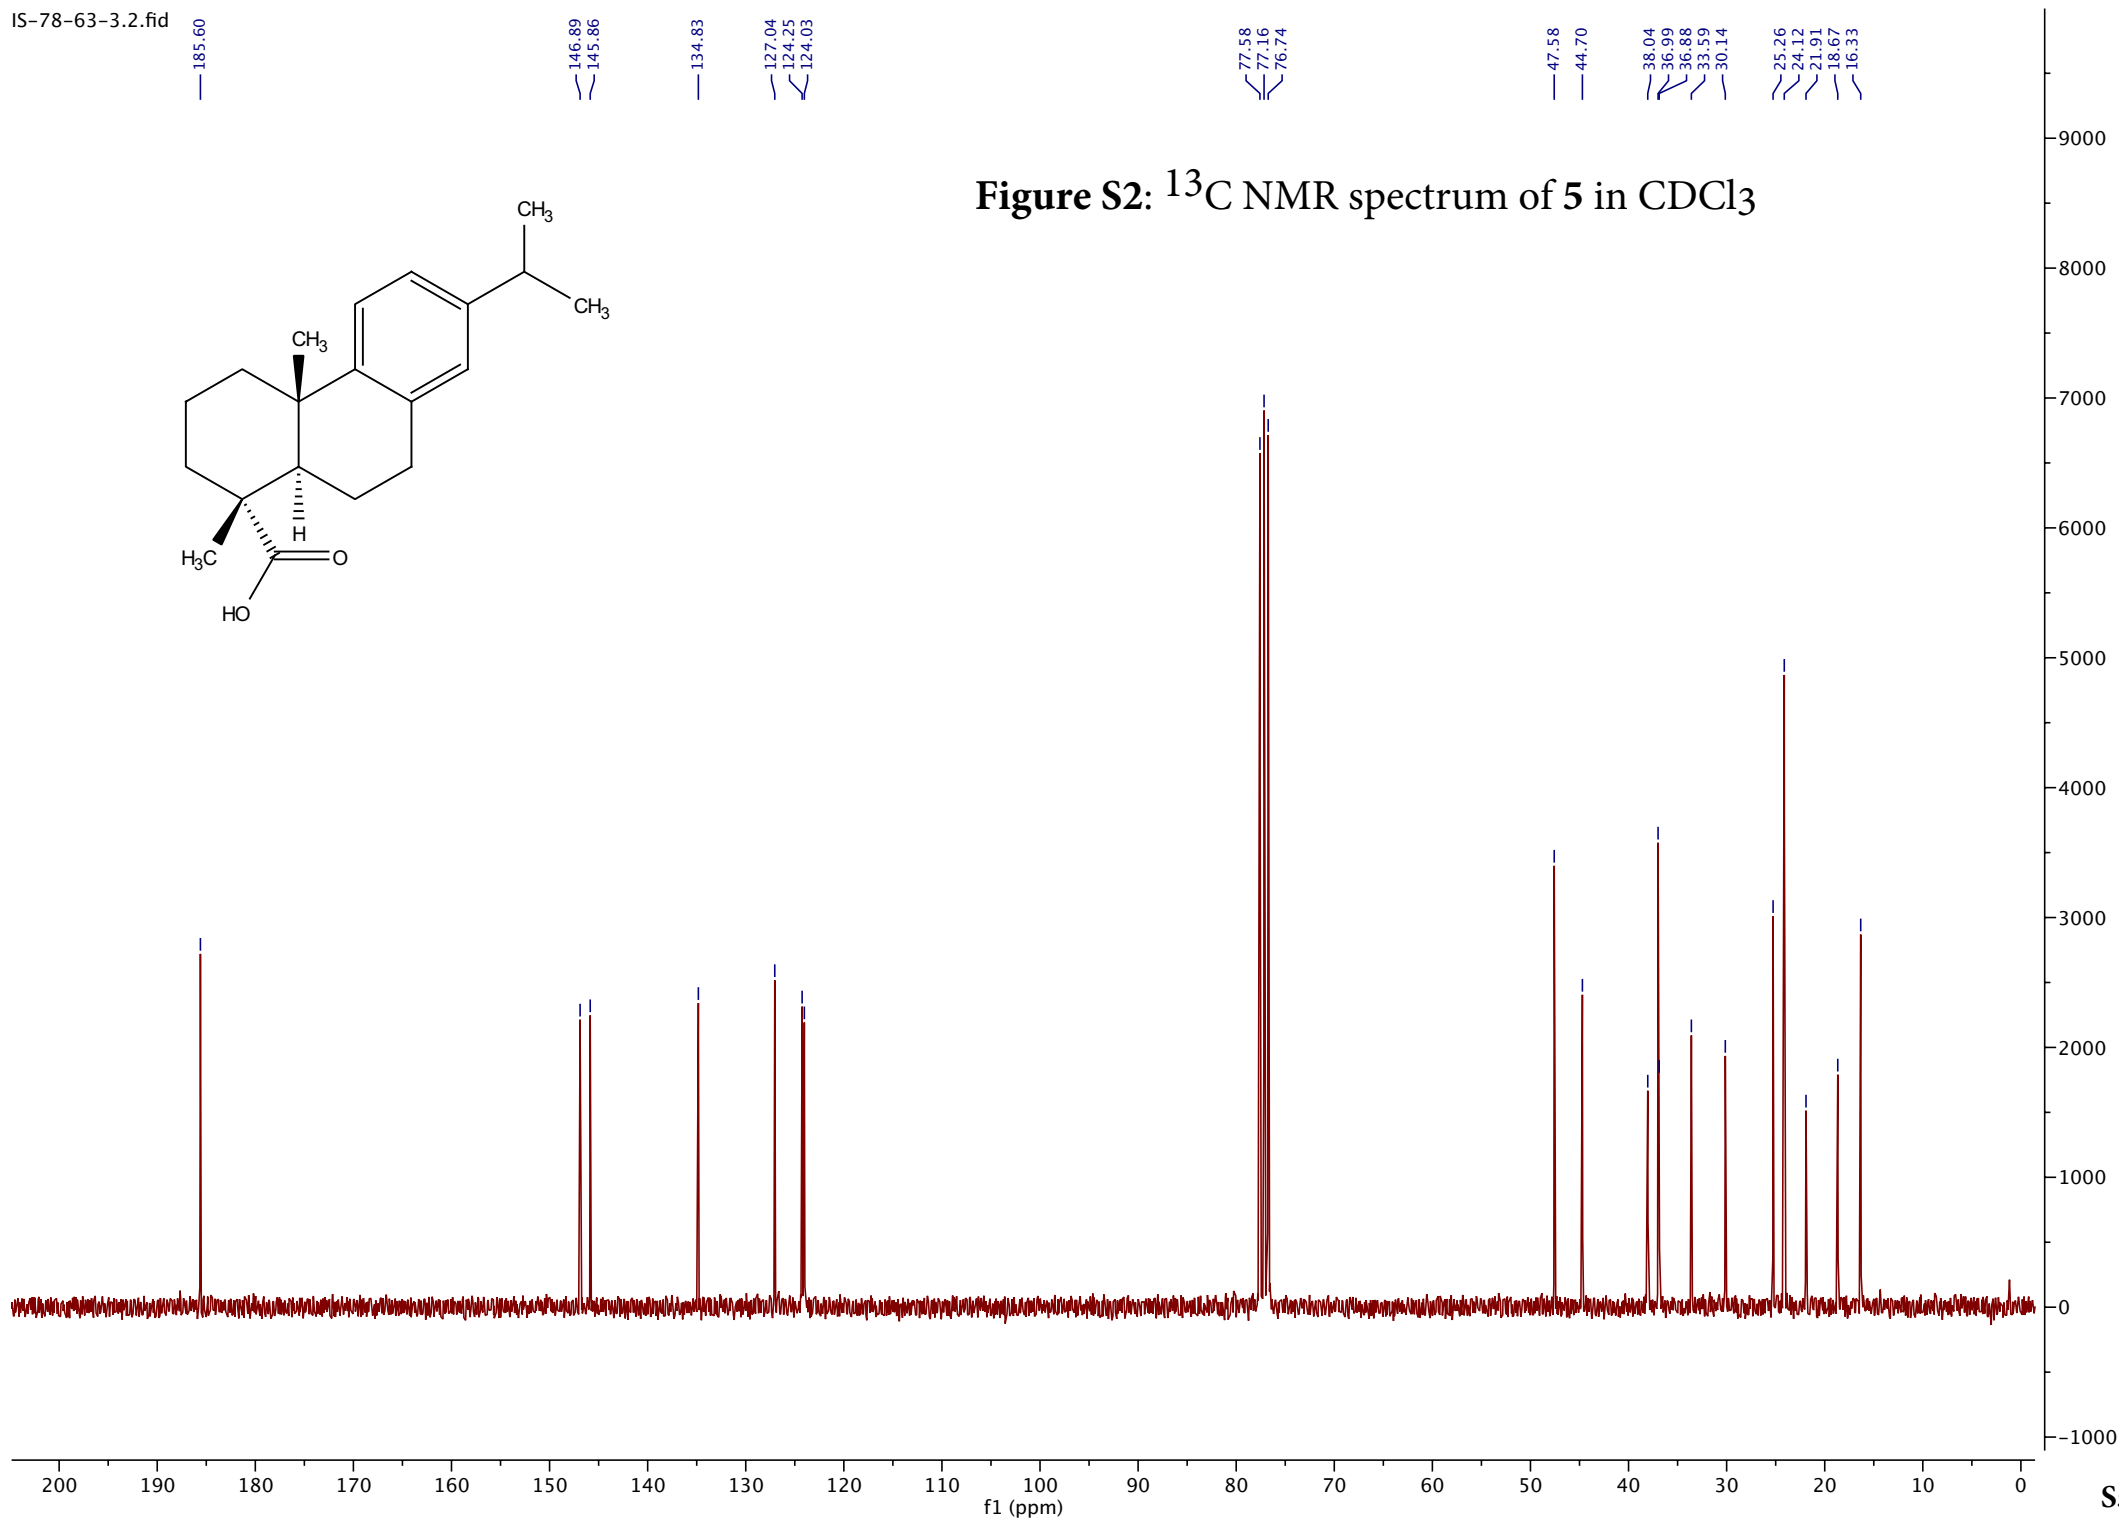

**Figure S3:** High resolution mass spectrum of **5**

| Sample Name | Mol Fomula | MW       | M+H      | observed | delta   | ppm   |
|-------------|------------|----------|----------|----------|---------|-------|
| IS-78-63-3  | C20H28O2   | 300.2089 | 301.2167 | 301.2164 | -0.0003 | -1.13 |

IS-78-63-3 #2237-2505 RT: 11.95-13.39 AV: 269 NL: 2.59E6  
T: FTMS + c NSI Full ms [120.0000-750.0000]

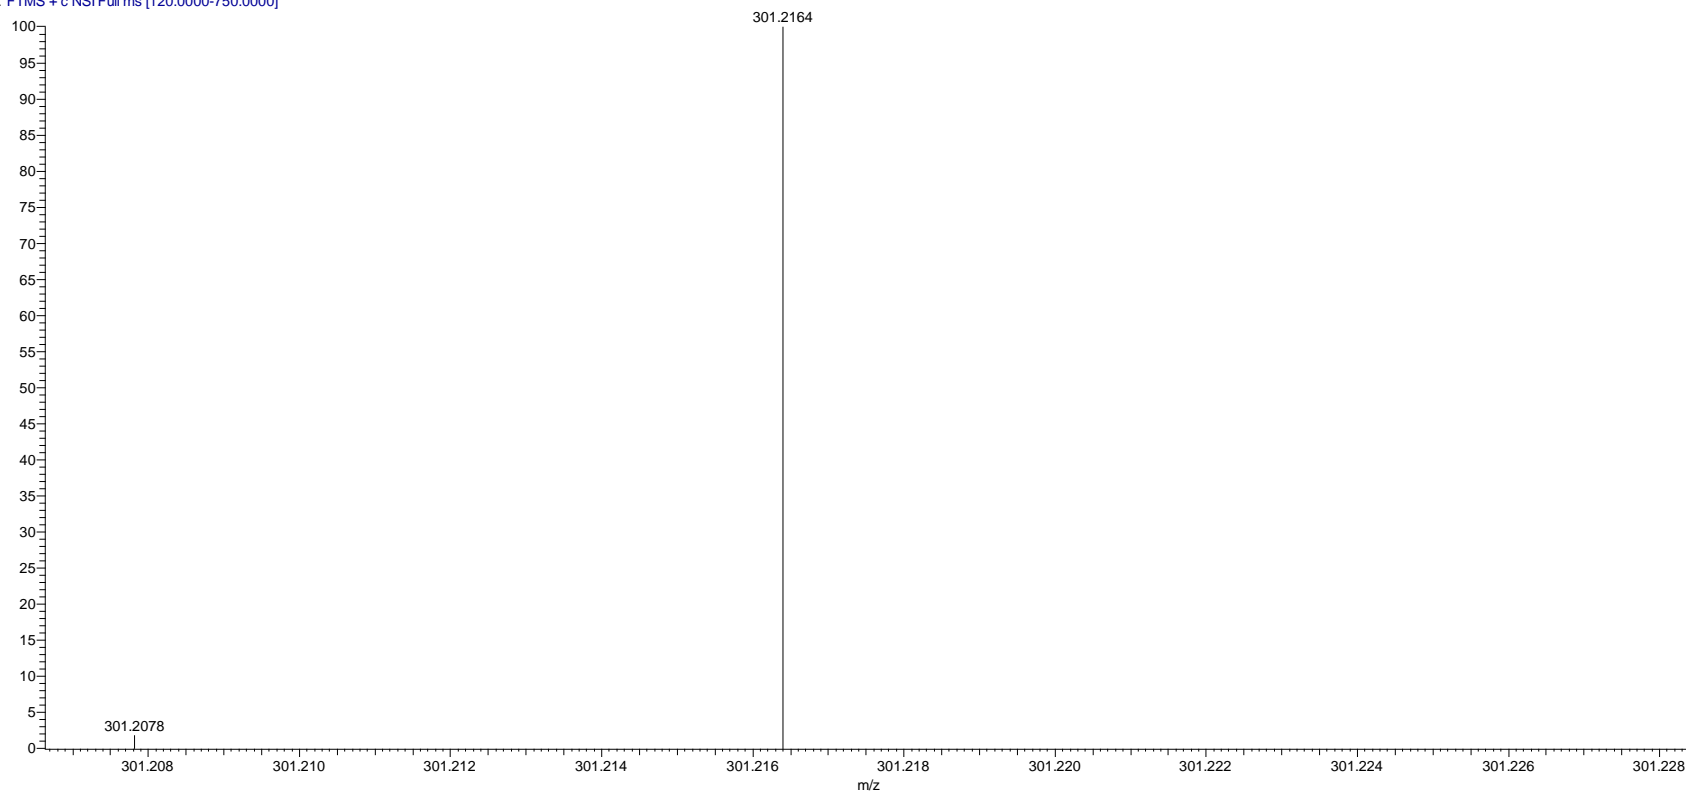

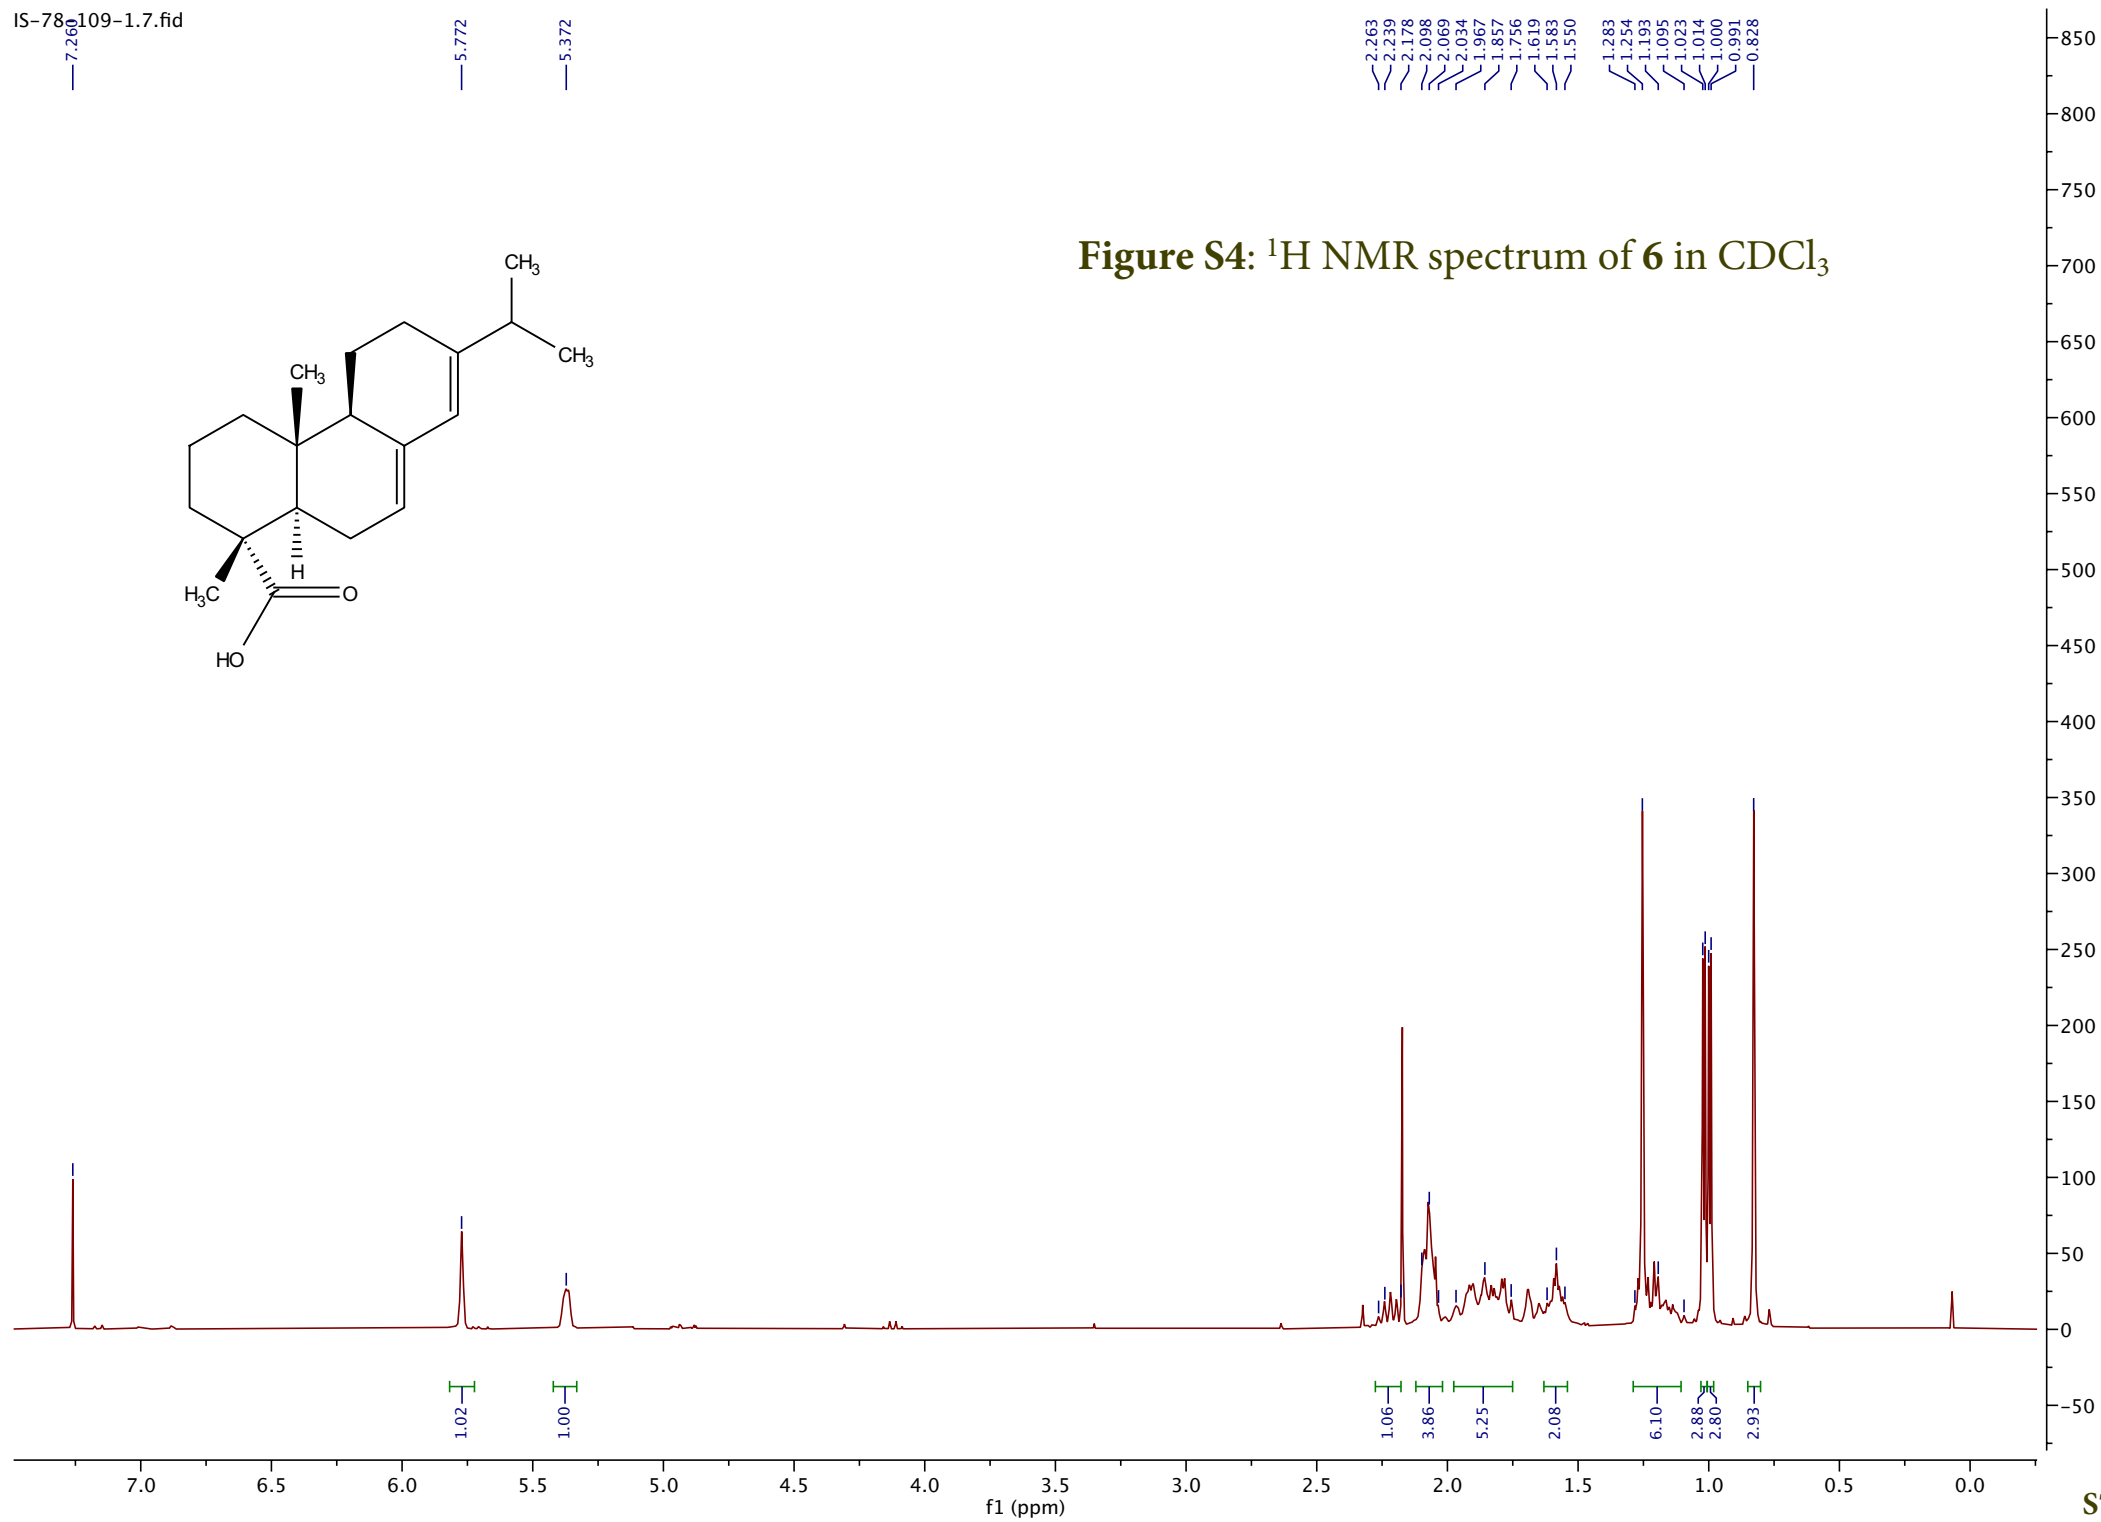

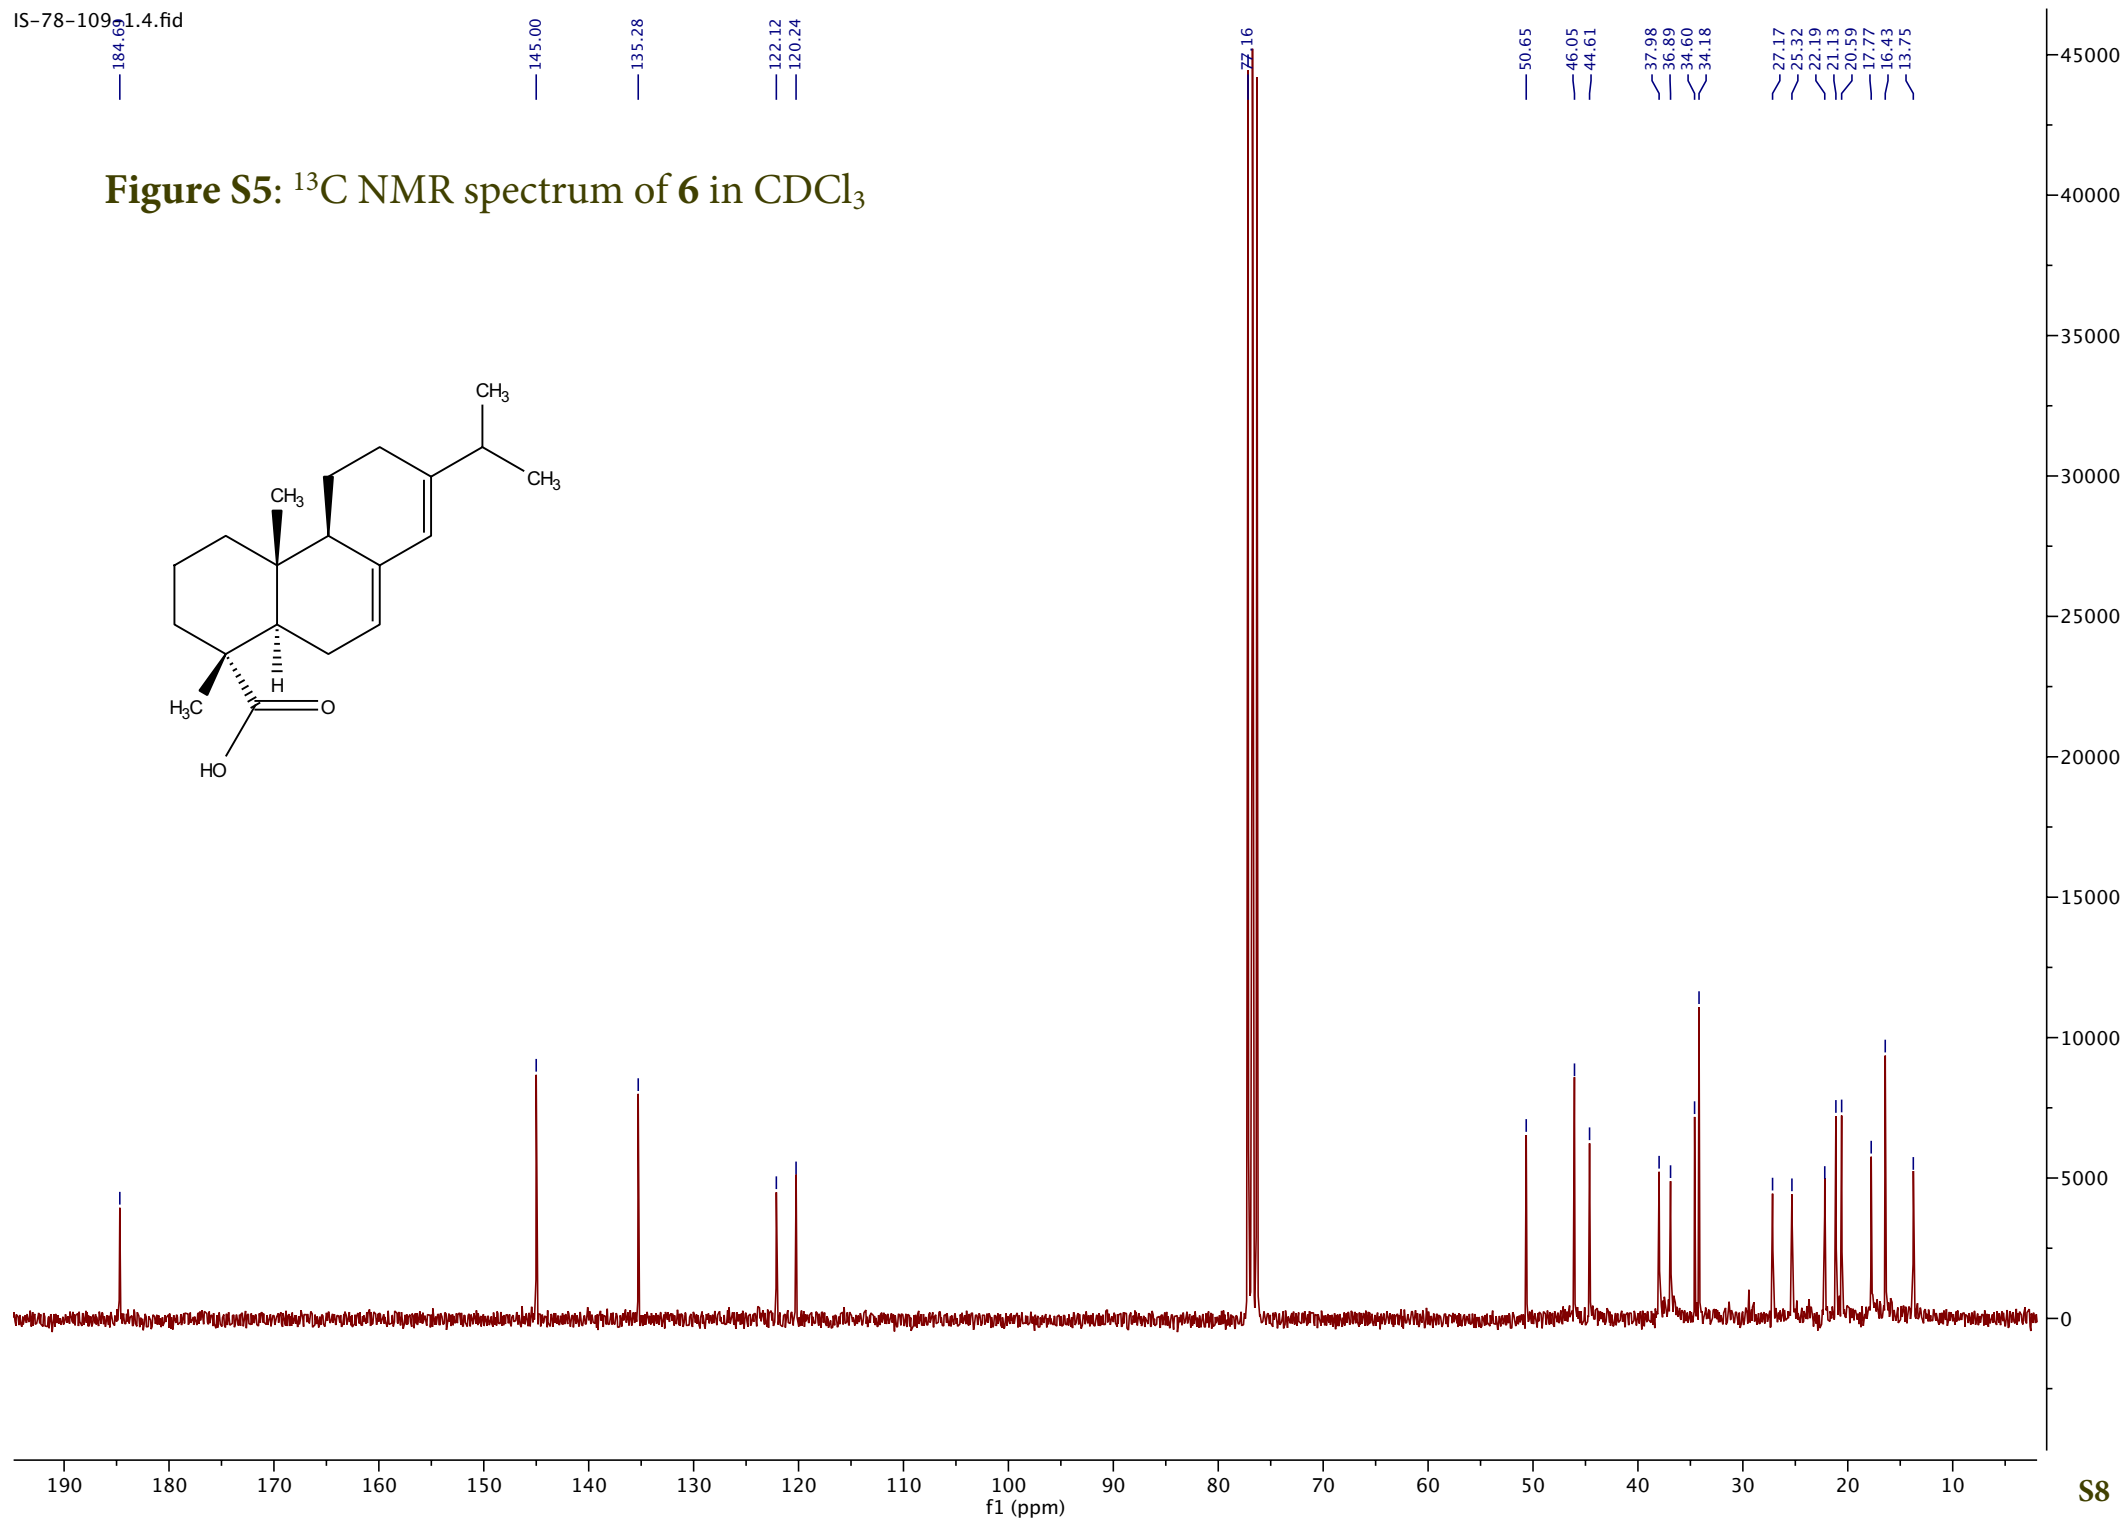



**Figure S6:** High resolution mass spectrum of **6**

| Sample Name | Mol Fomula | MW       | M+H      | observed | delta   | ppm   |
|-------------|------------|----------|----------|----------|---------|-------|
| IS-78-109-2 | C20H30O2   | 302.2246 | 303.2324 | 303.2321 | -0.0003 | -0.96 |

IS-78-109-2 #2957-3058 RT: 15.49-16.02 AV: 102 NL: 2.47E5  
T: FTMS + c NSI Full ms [100.0000-1000.0000]

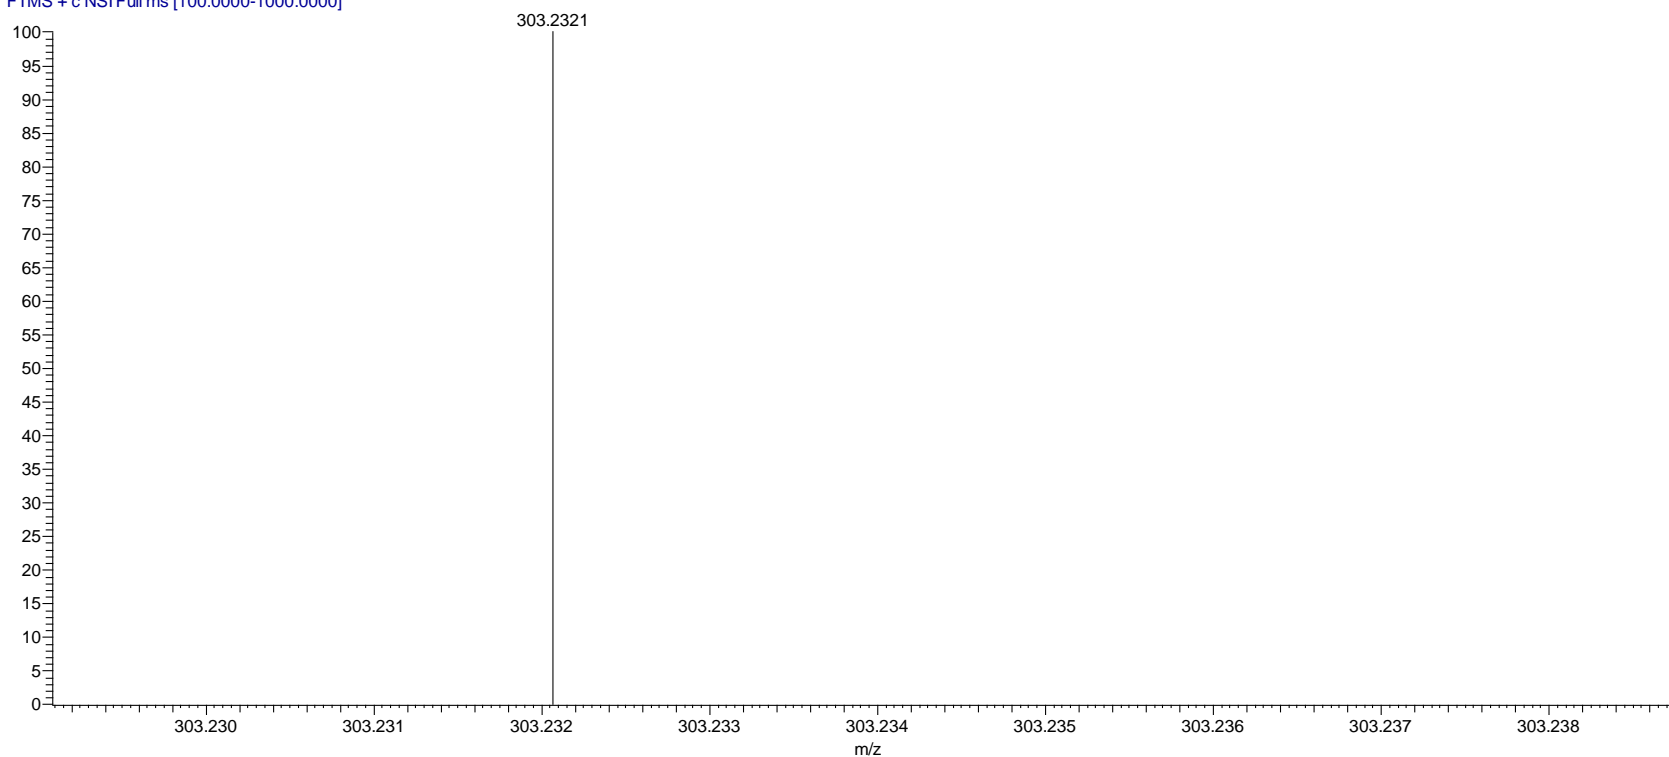

7.260  
7.200  
7.173  
7.016  
7.009  
6.989  
6.982  
6.901  
6.894

2.923  
2.877  
2.785  
2.642  
2.598  
2.490  
2.446  
2.379  
2.320  
2.273

1.798  
1.723  
1.637  
1.529  
1.387  
1.346  
1.244  
1.230  
1.221

0.916

**Figure S7:**  $^1\text{H}$  NMR spectrum of **7** in  $\text{CDCl}_3$

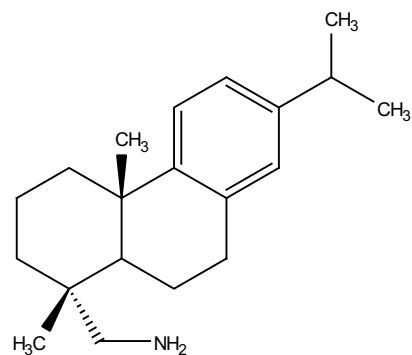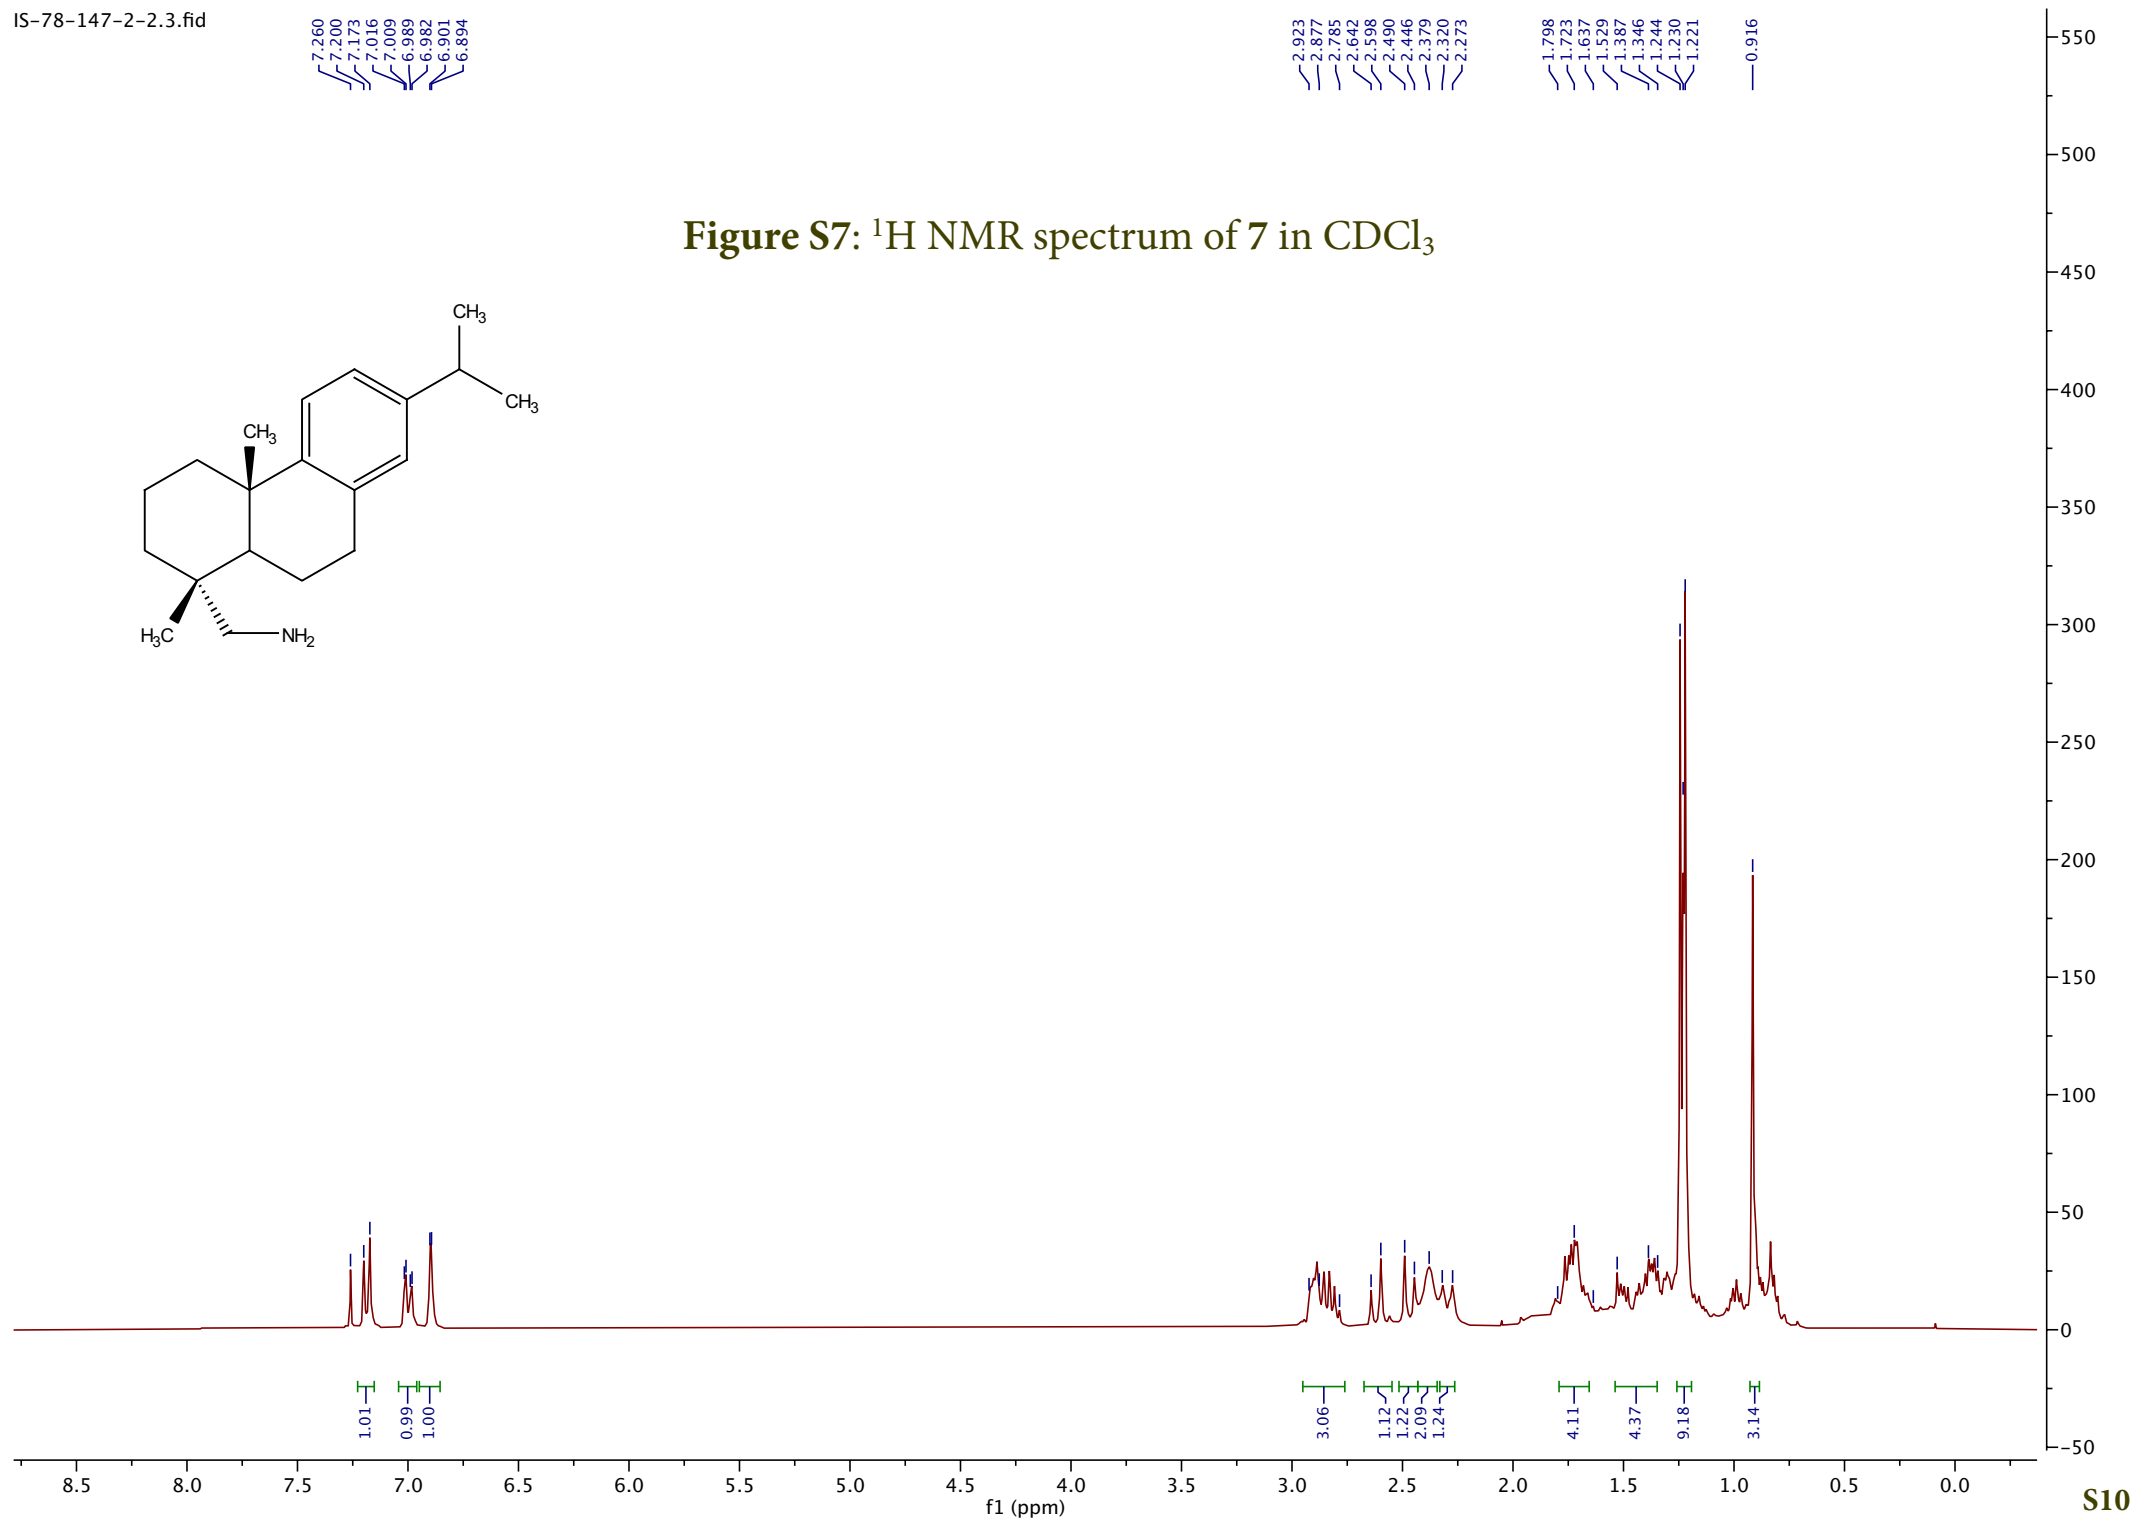

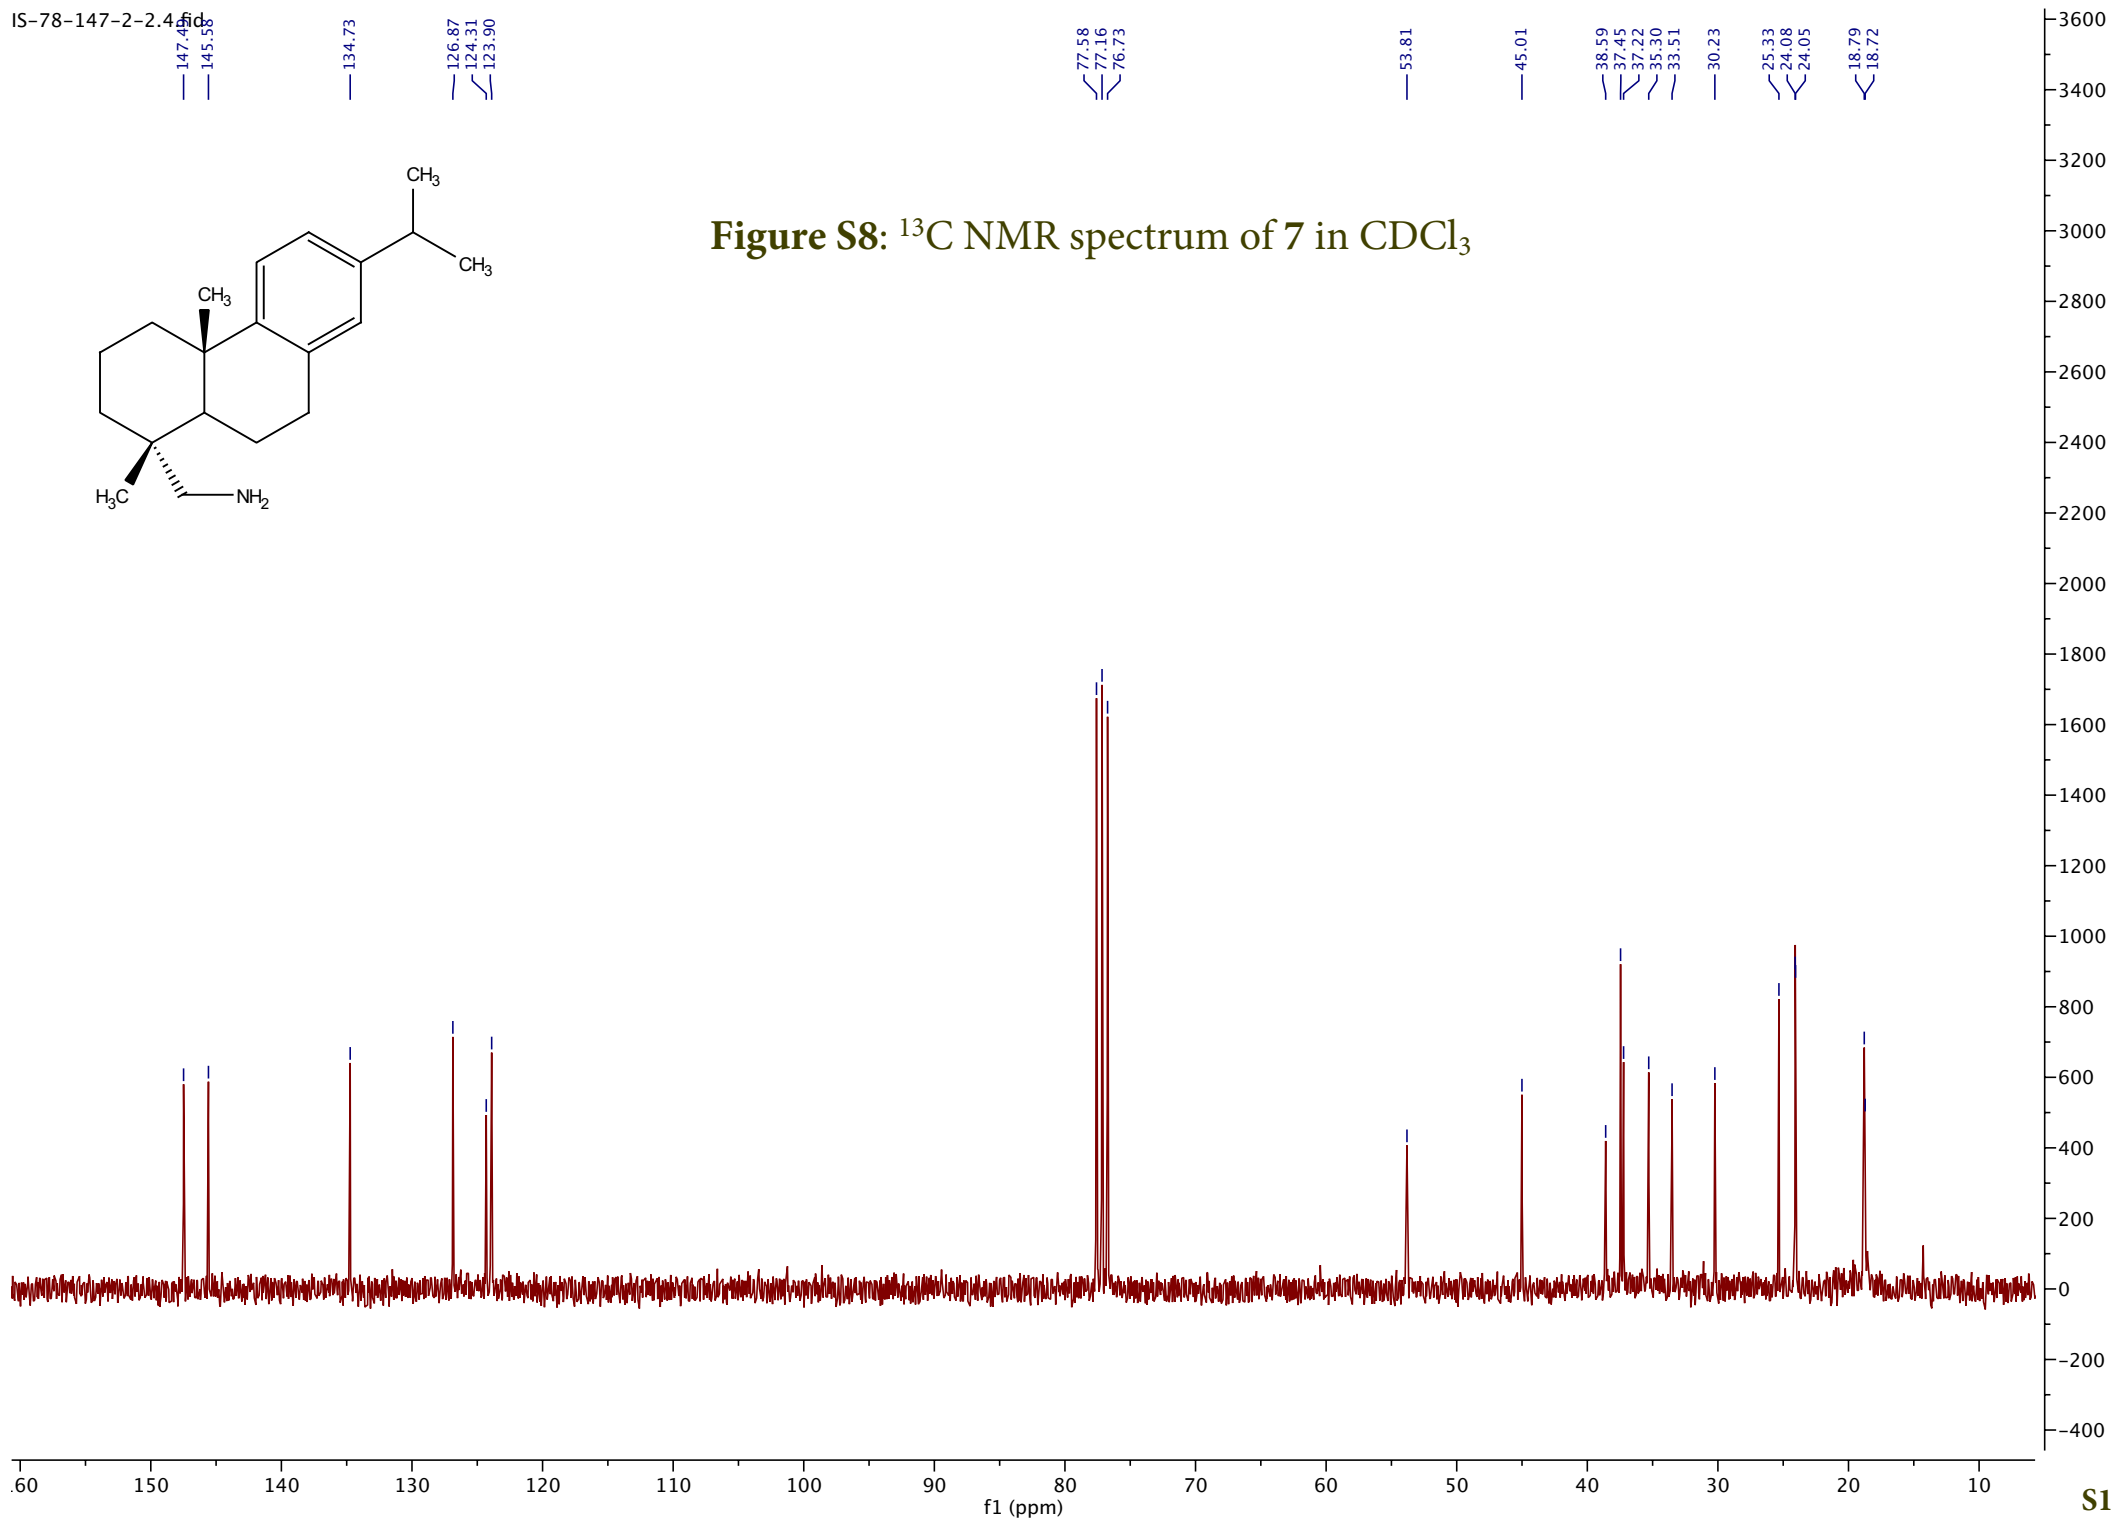

**Figure S9:** High resolution mass spectrum of **7**

| Sample Name | Mol Fomula | MW       | M+H      | observed | delta   | ppm   |
|-------------|------------|----------|----------|----------|---------|-------|
| IS-78-147-3 | C20H31N    | 285.2457 | 286.2535 | 286.2530 | -0.0005 | -1.57 |

IS-78-147-3 #1900-1922 RT: 9.99-10.10 AV: 23 NL: 2.09E9  
T: FTMS + c NSI Full ms [100.0000-1000.0000]

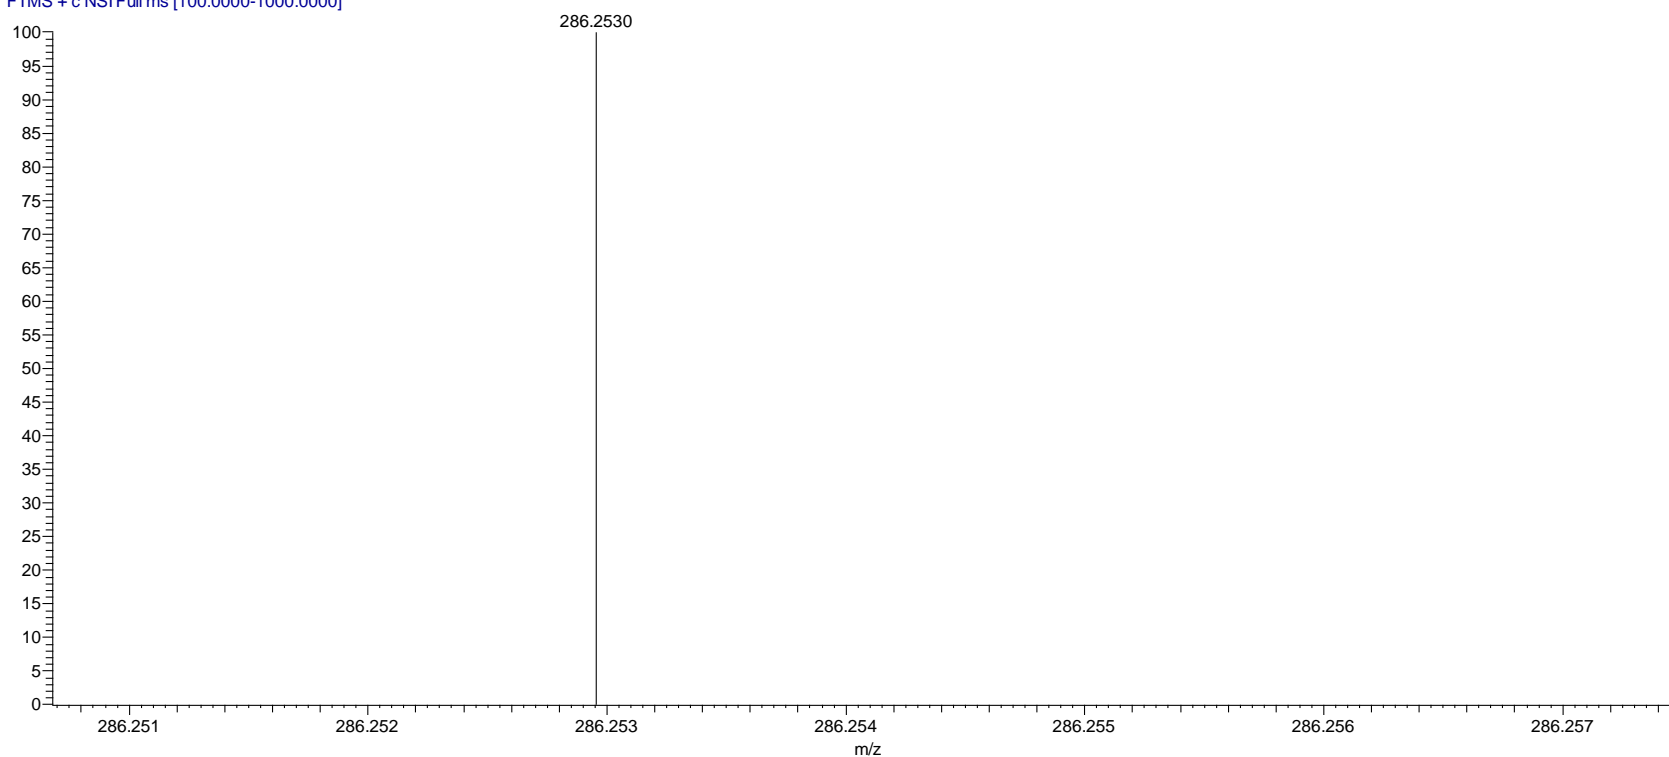

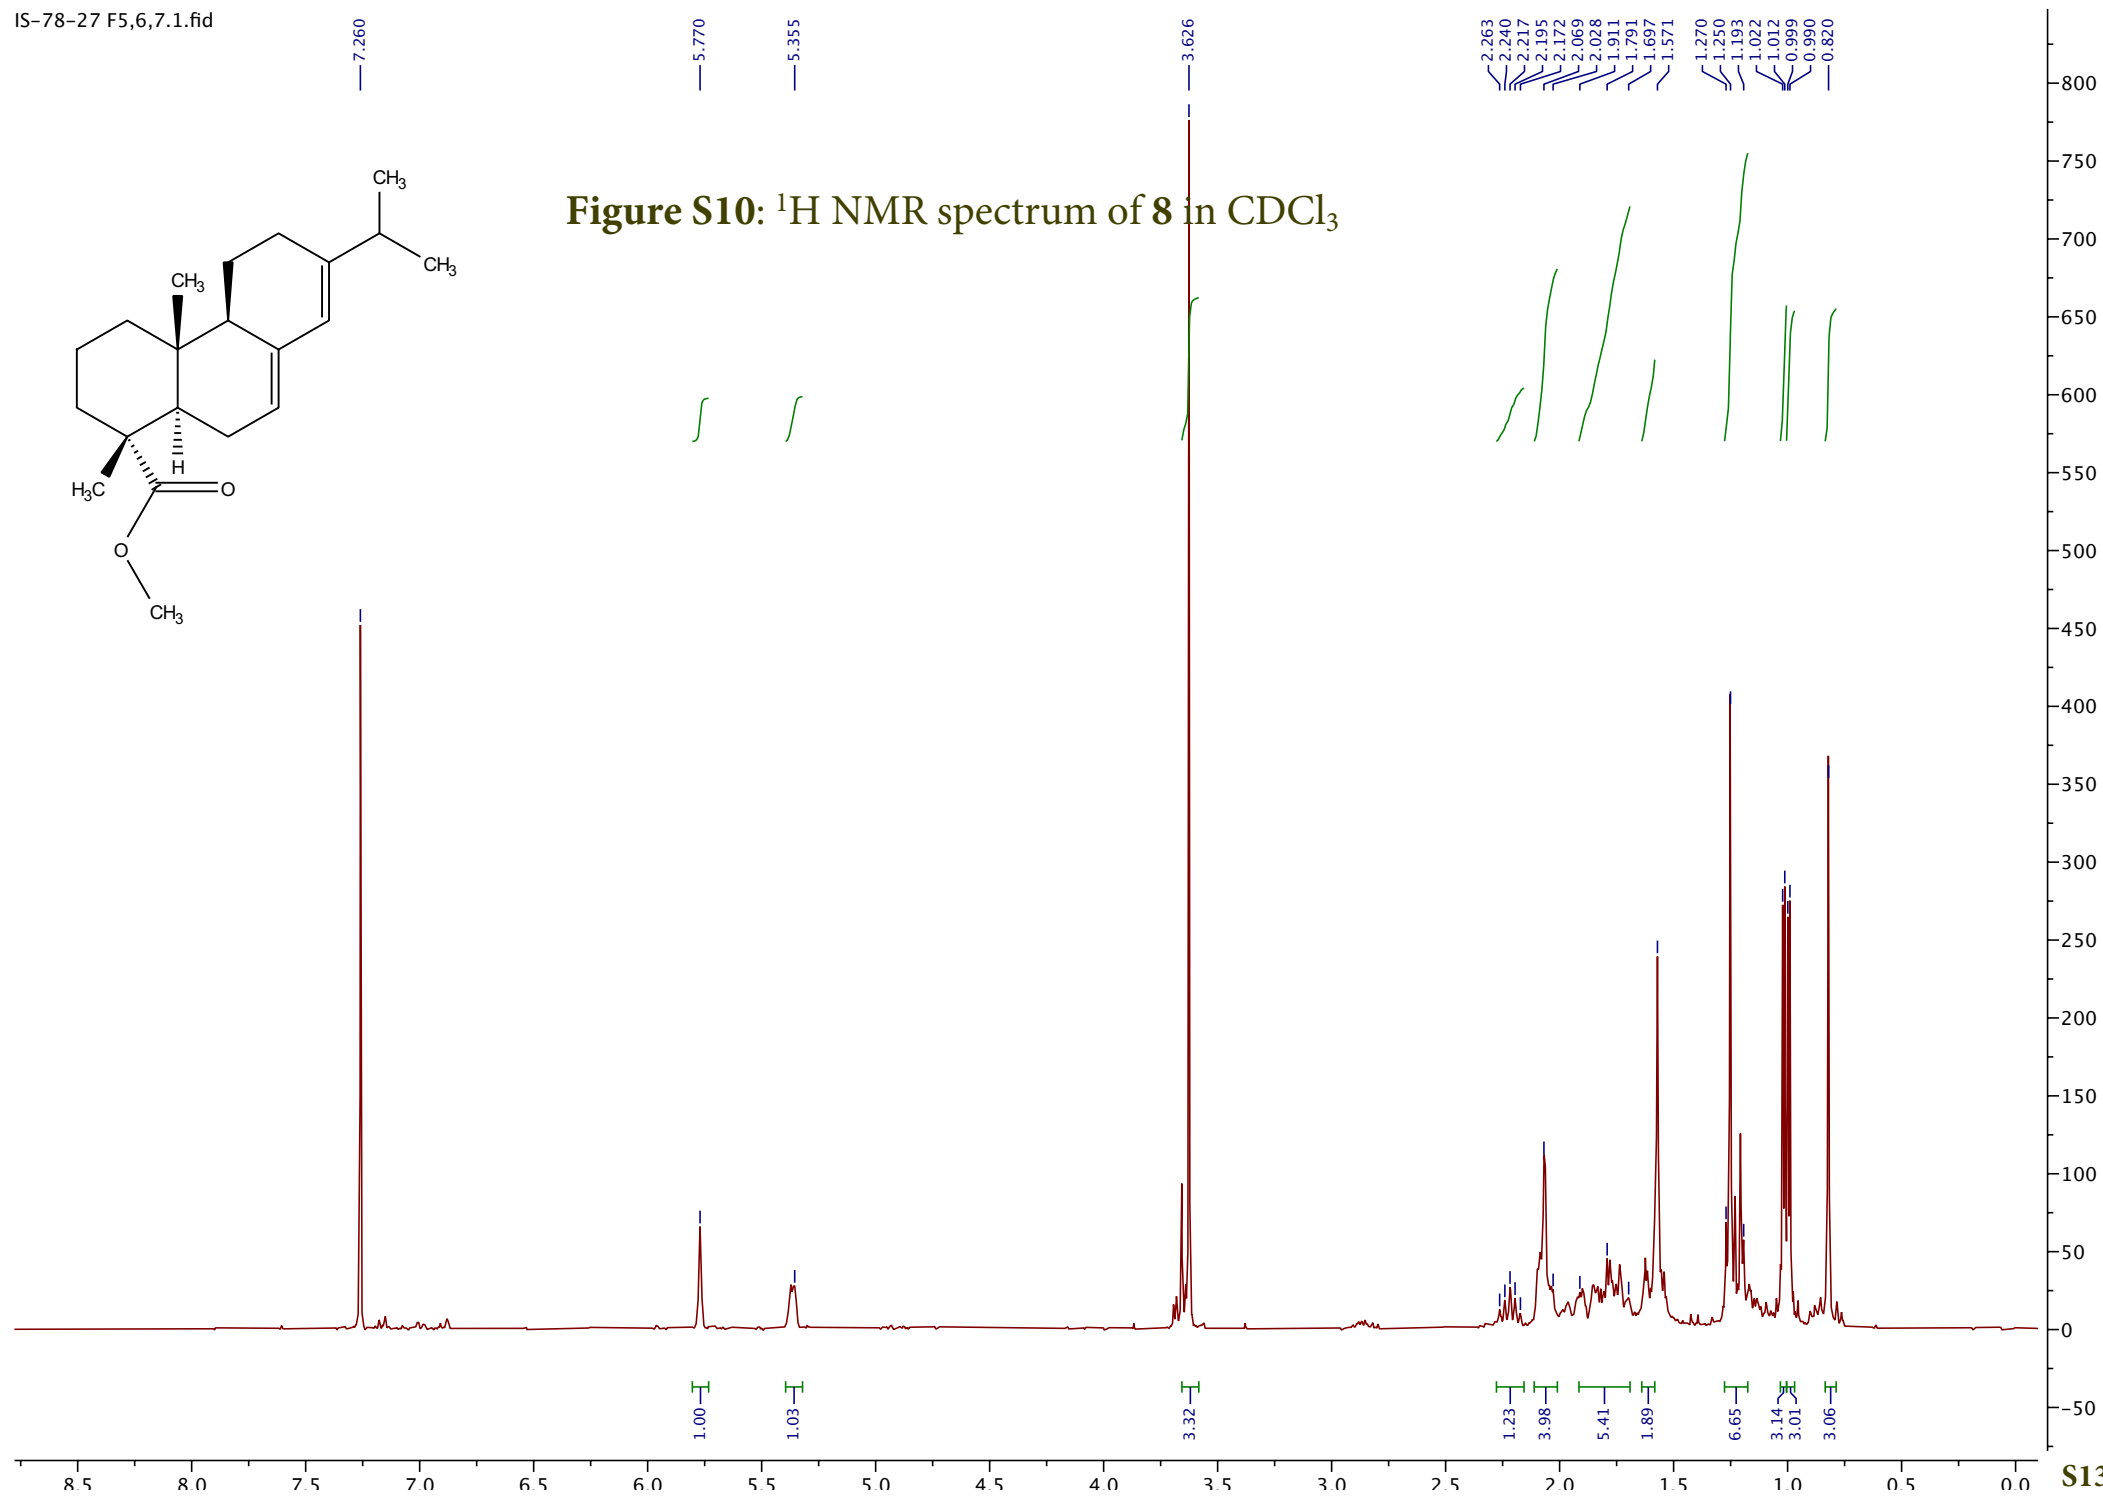

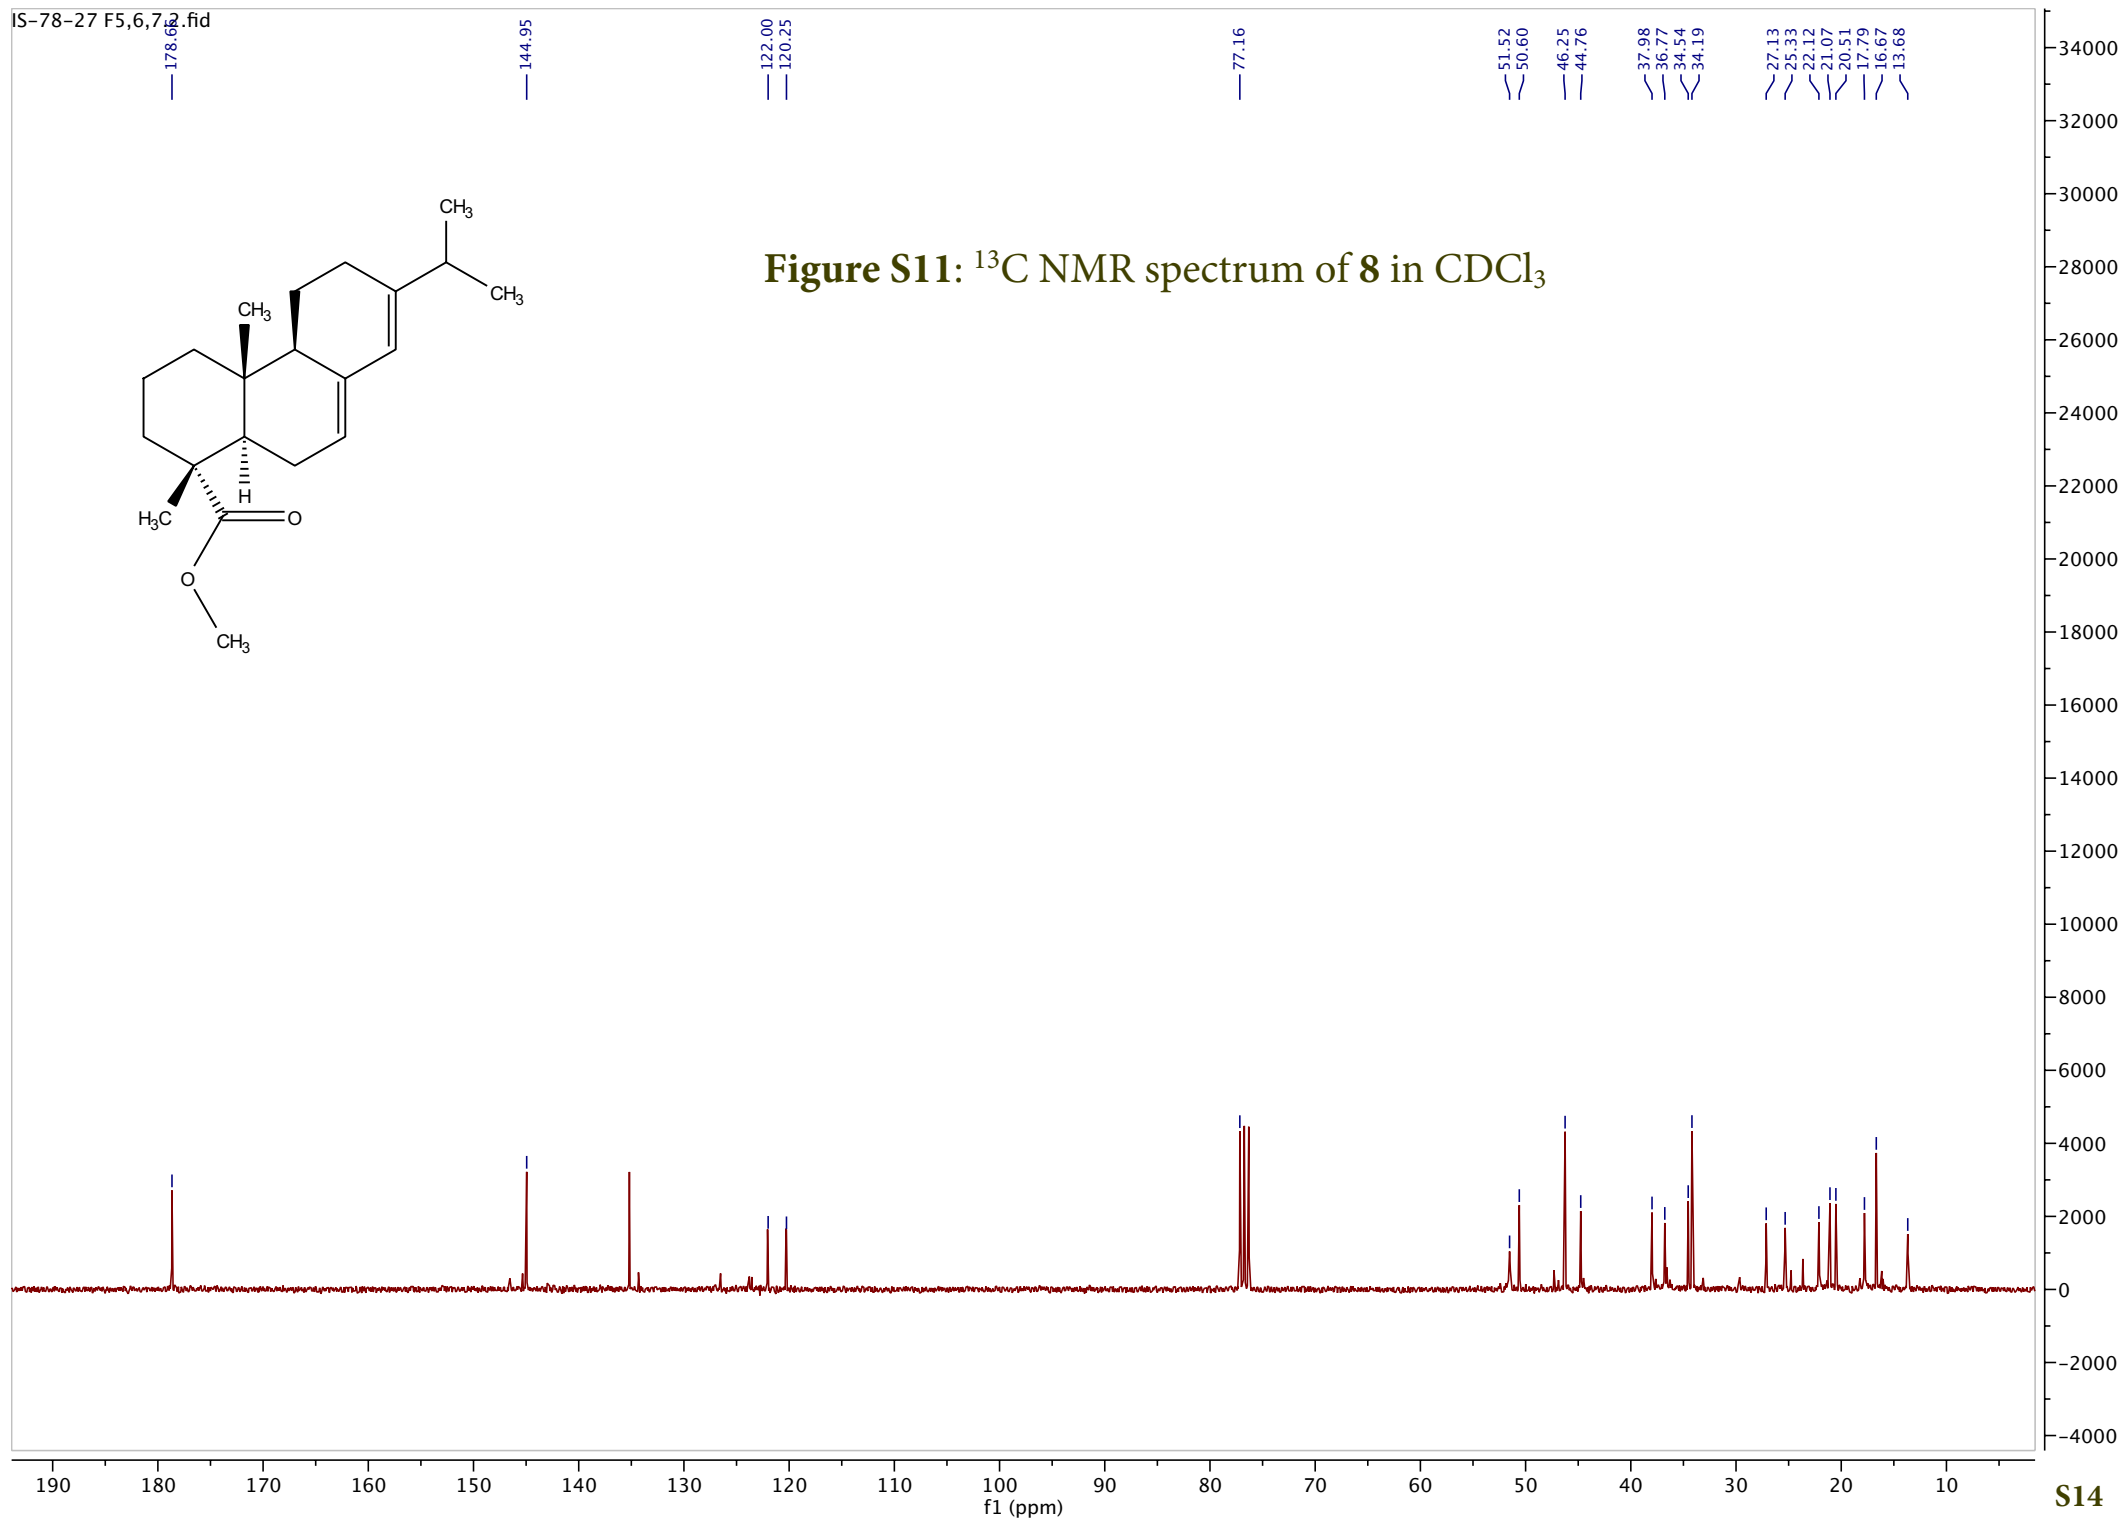

Figure S12: High resolution mass spectrum of 8

| Sample Name | Mol Fomula | MW       | M+H      | observed | delta   | ppm   |
|-------------|------------|----------|----------|----------|---------|-------|
| IS-78-27-5  | C21H32O2   | 316.2402 | 317.2480 | 317.2478 | -0.0002 | -0.76 |

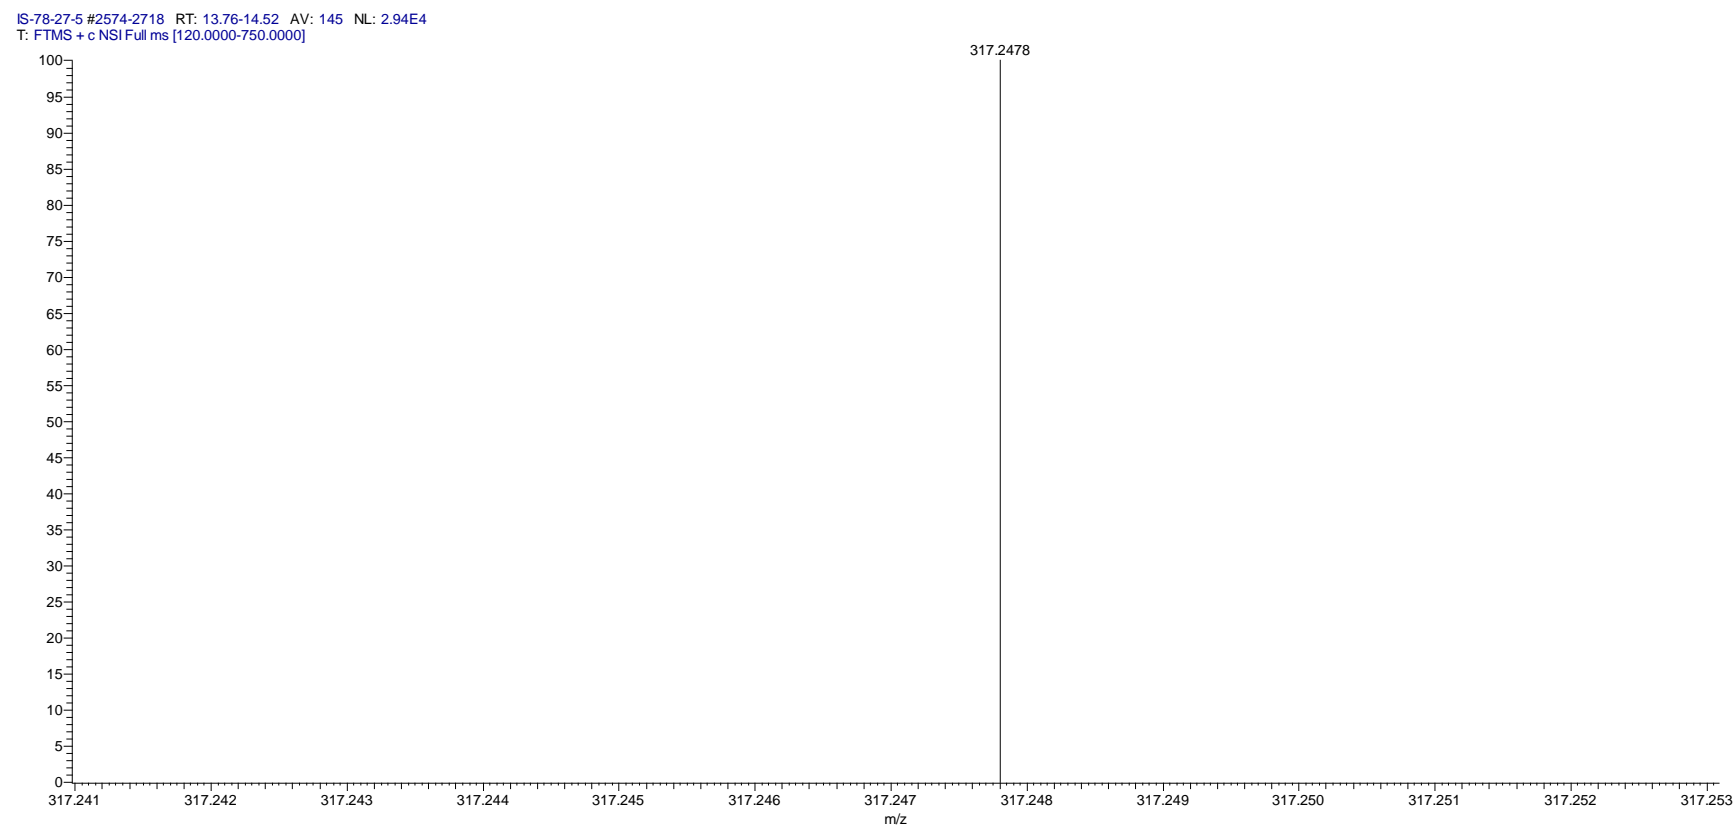

7.260

5.743

5.348

3.598  
3.576  
3.5612.239  
2.217  
2.170  
2.135  
2.069  
2.024  
1.893  
1.752  
1.670  
1.588  
1.498  
1.454  
1.295  
1.264  
1.231  
1.209  
1.186  
1.165  
1.001  
0.993  
0.978  
0.970  
0.835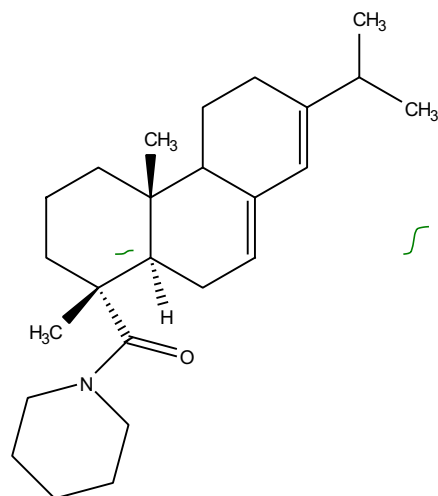

**Figure S13:**  $^1\text{H}$  NMR spectrum of **9** in  $\text{CDCl}_3$

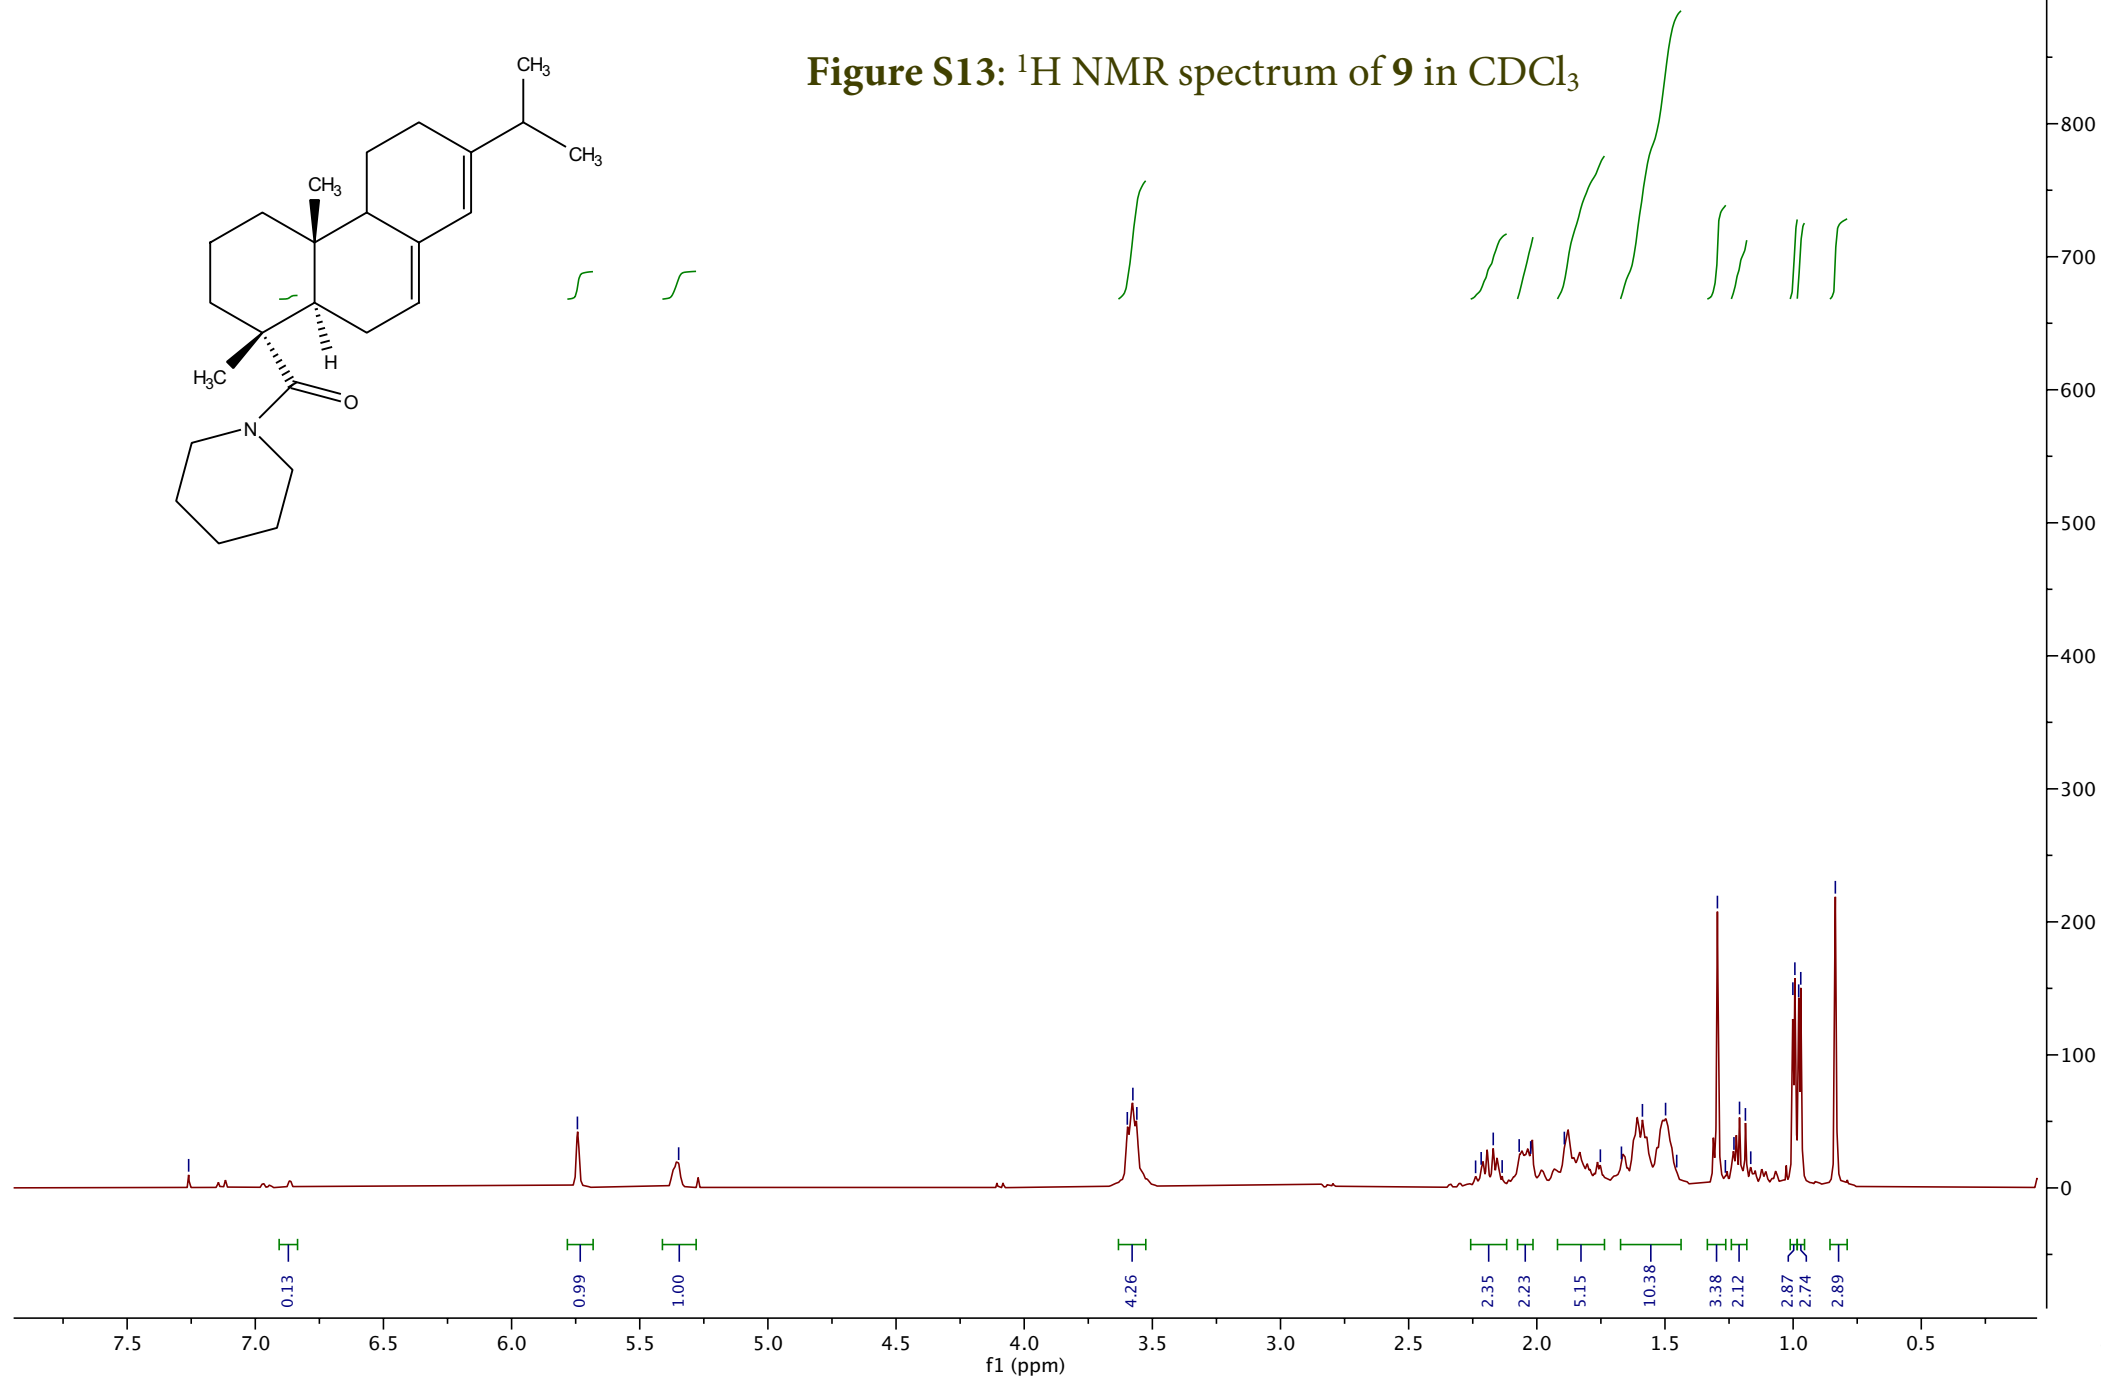



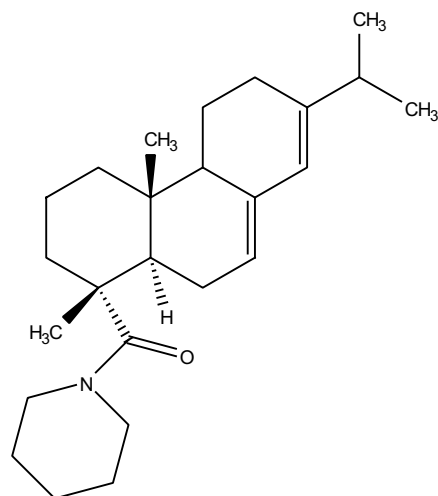

**Figure S14:** <sup>13</sup>C NMR spectrum of **9** in CDCl<sub>3</sub>

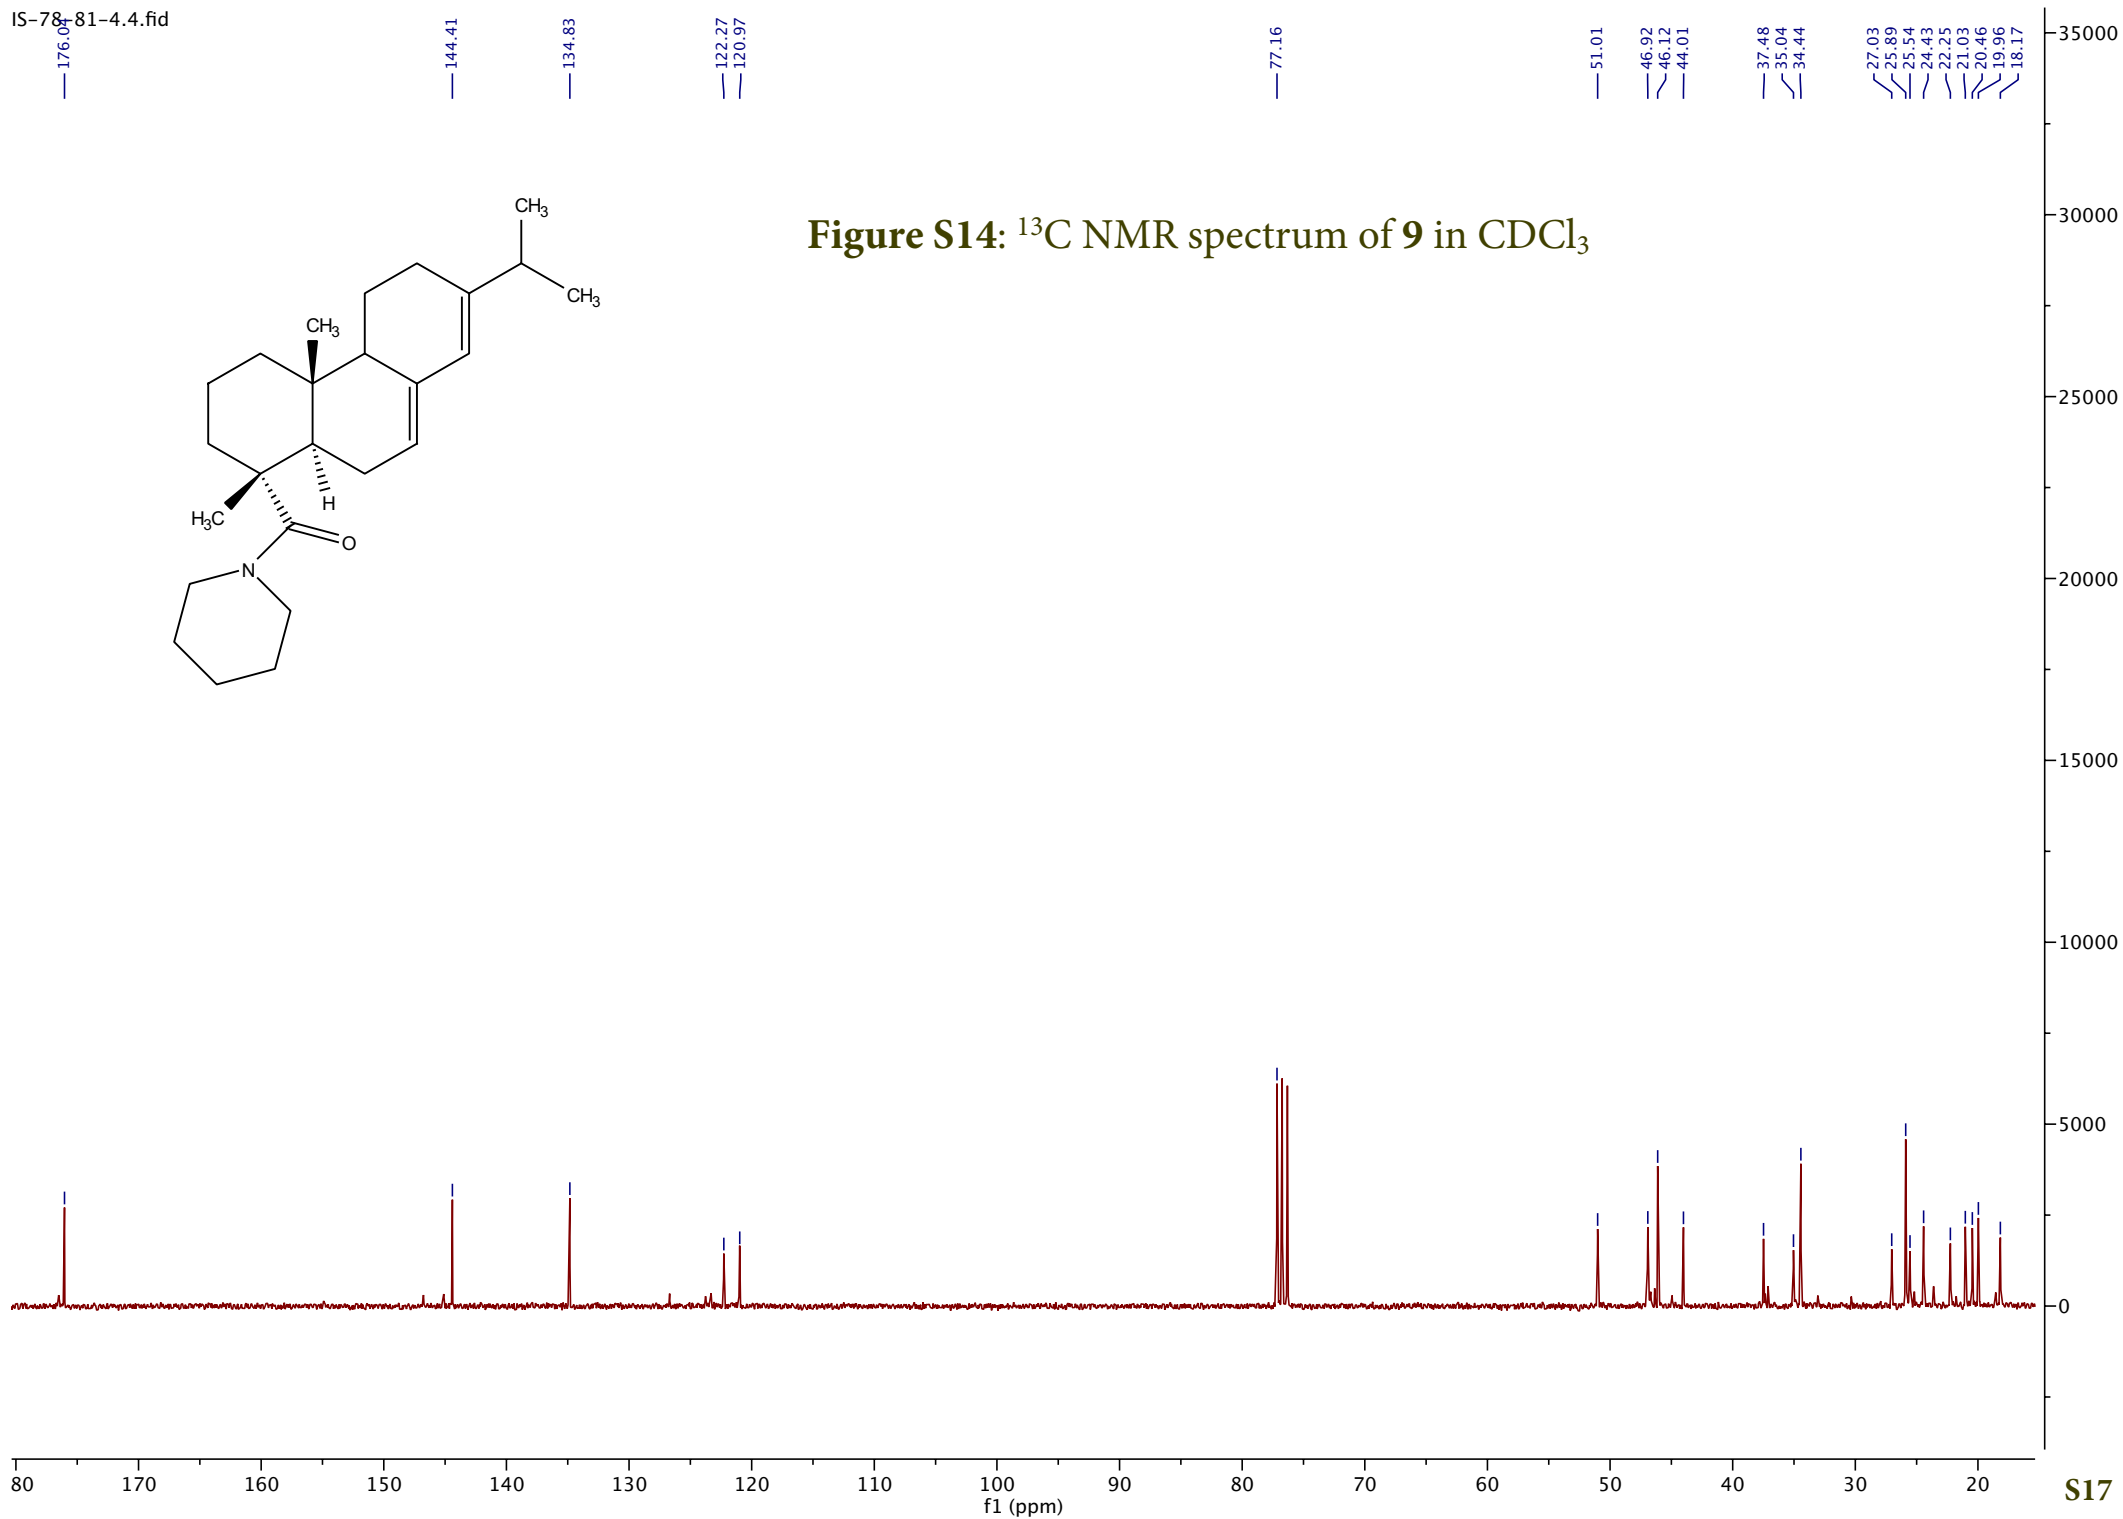

**Figure S15:** High resolution mass spectrum of **9**

| Sample Name | Mol Fomula | MW(COME WITH SAMPLES) | MW(CALCULATED) | M+H      | observed        | delta   | ppm   |
|-------------|------------|-----------------------|----------------|----------|-----------------|---------|-------|
| IS-78-81    | C25H39NO   | 369.3032              | 369.30317      | 370.3110 | <b>370.3106</b> | -0.0004 | -1.00 |

IS-78-81 #180-692 RT: 1.29-4.46 AV: 513 NL: 7.47E6  
T: FTMS + c ESI Full ms [300.0000-900.0000]

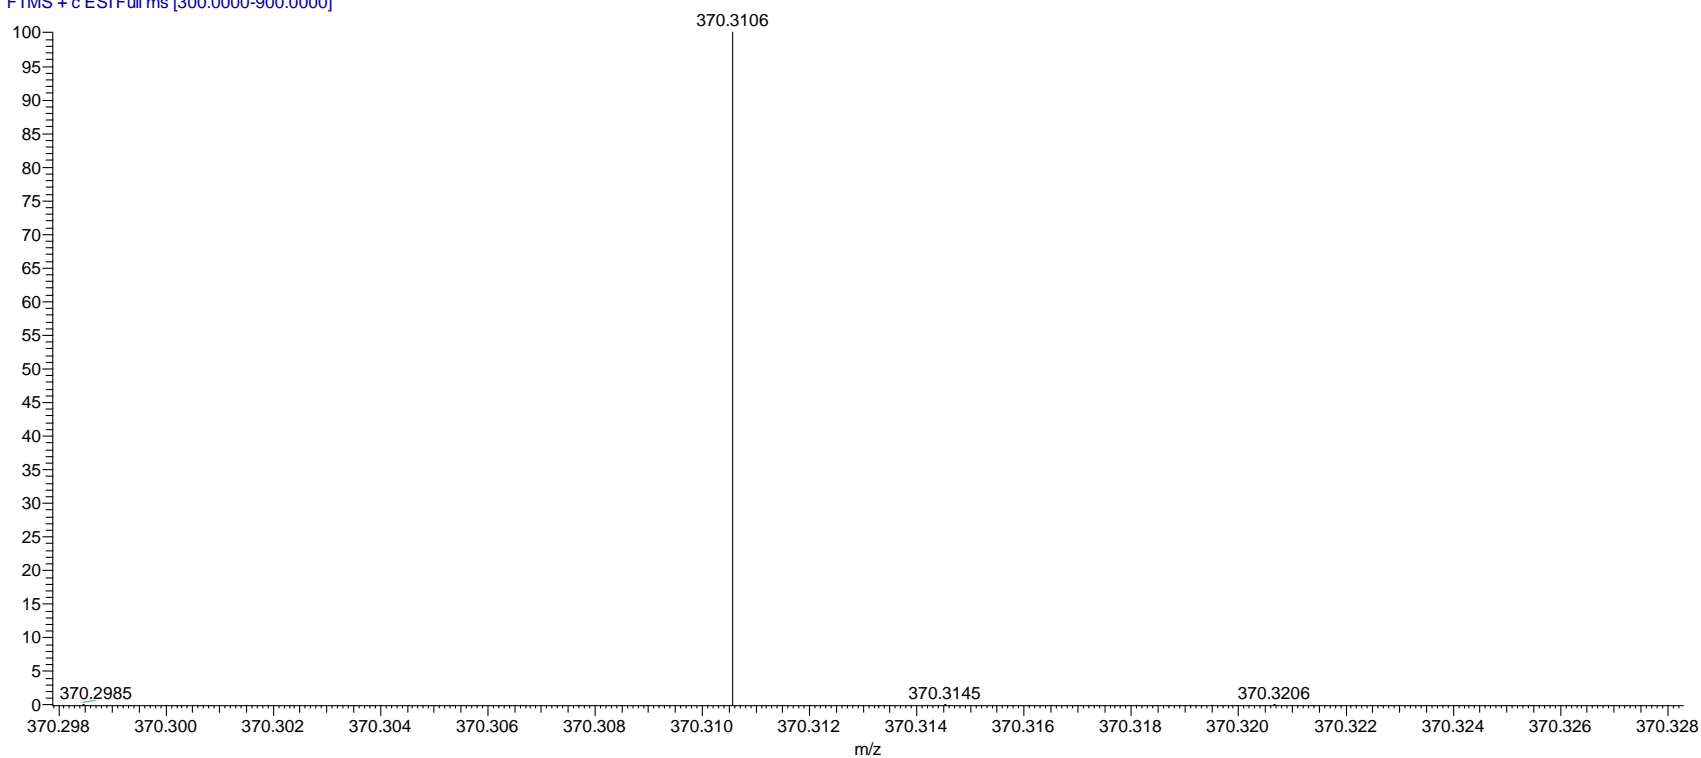

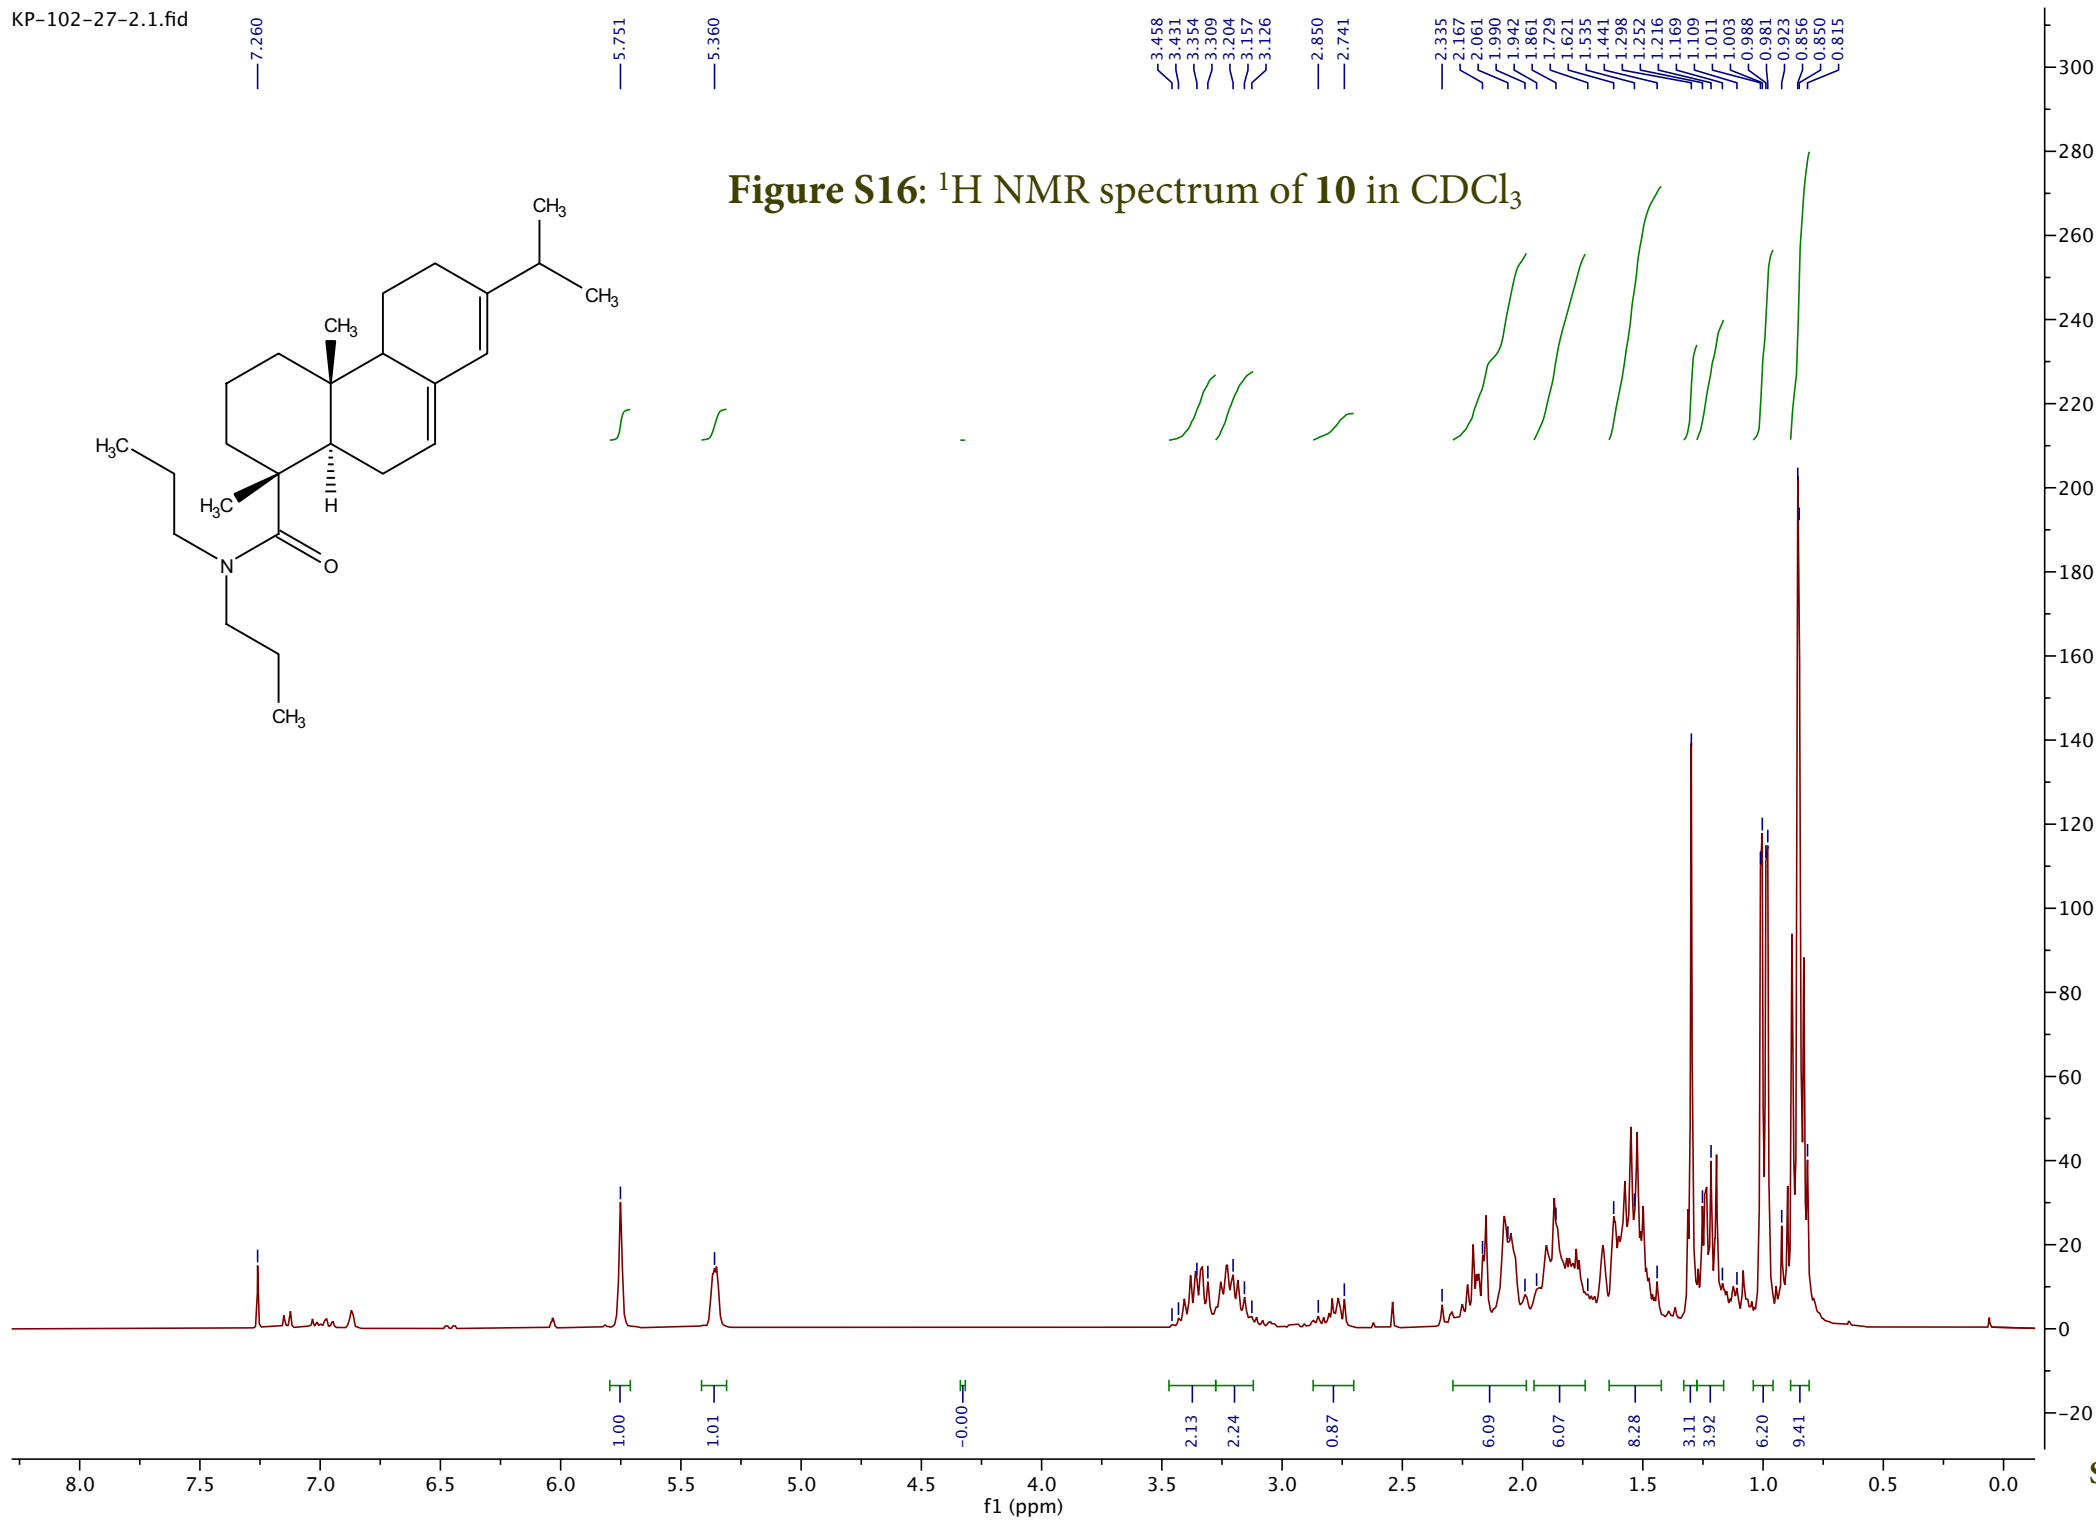

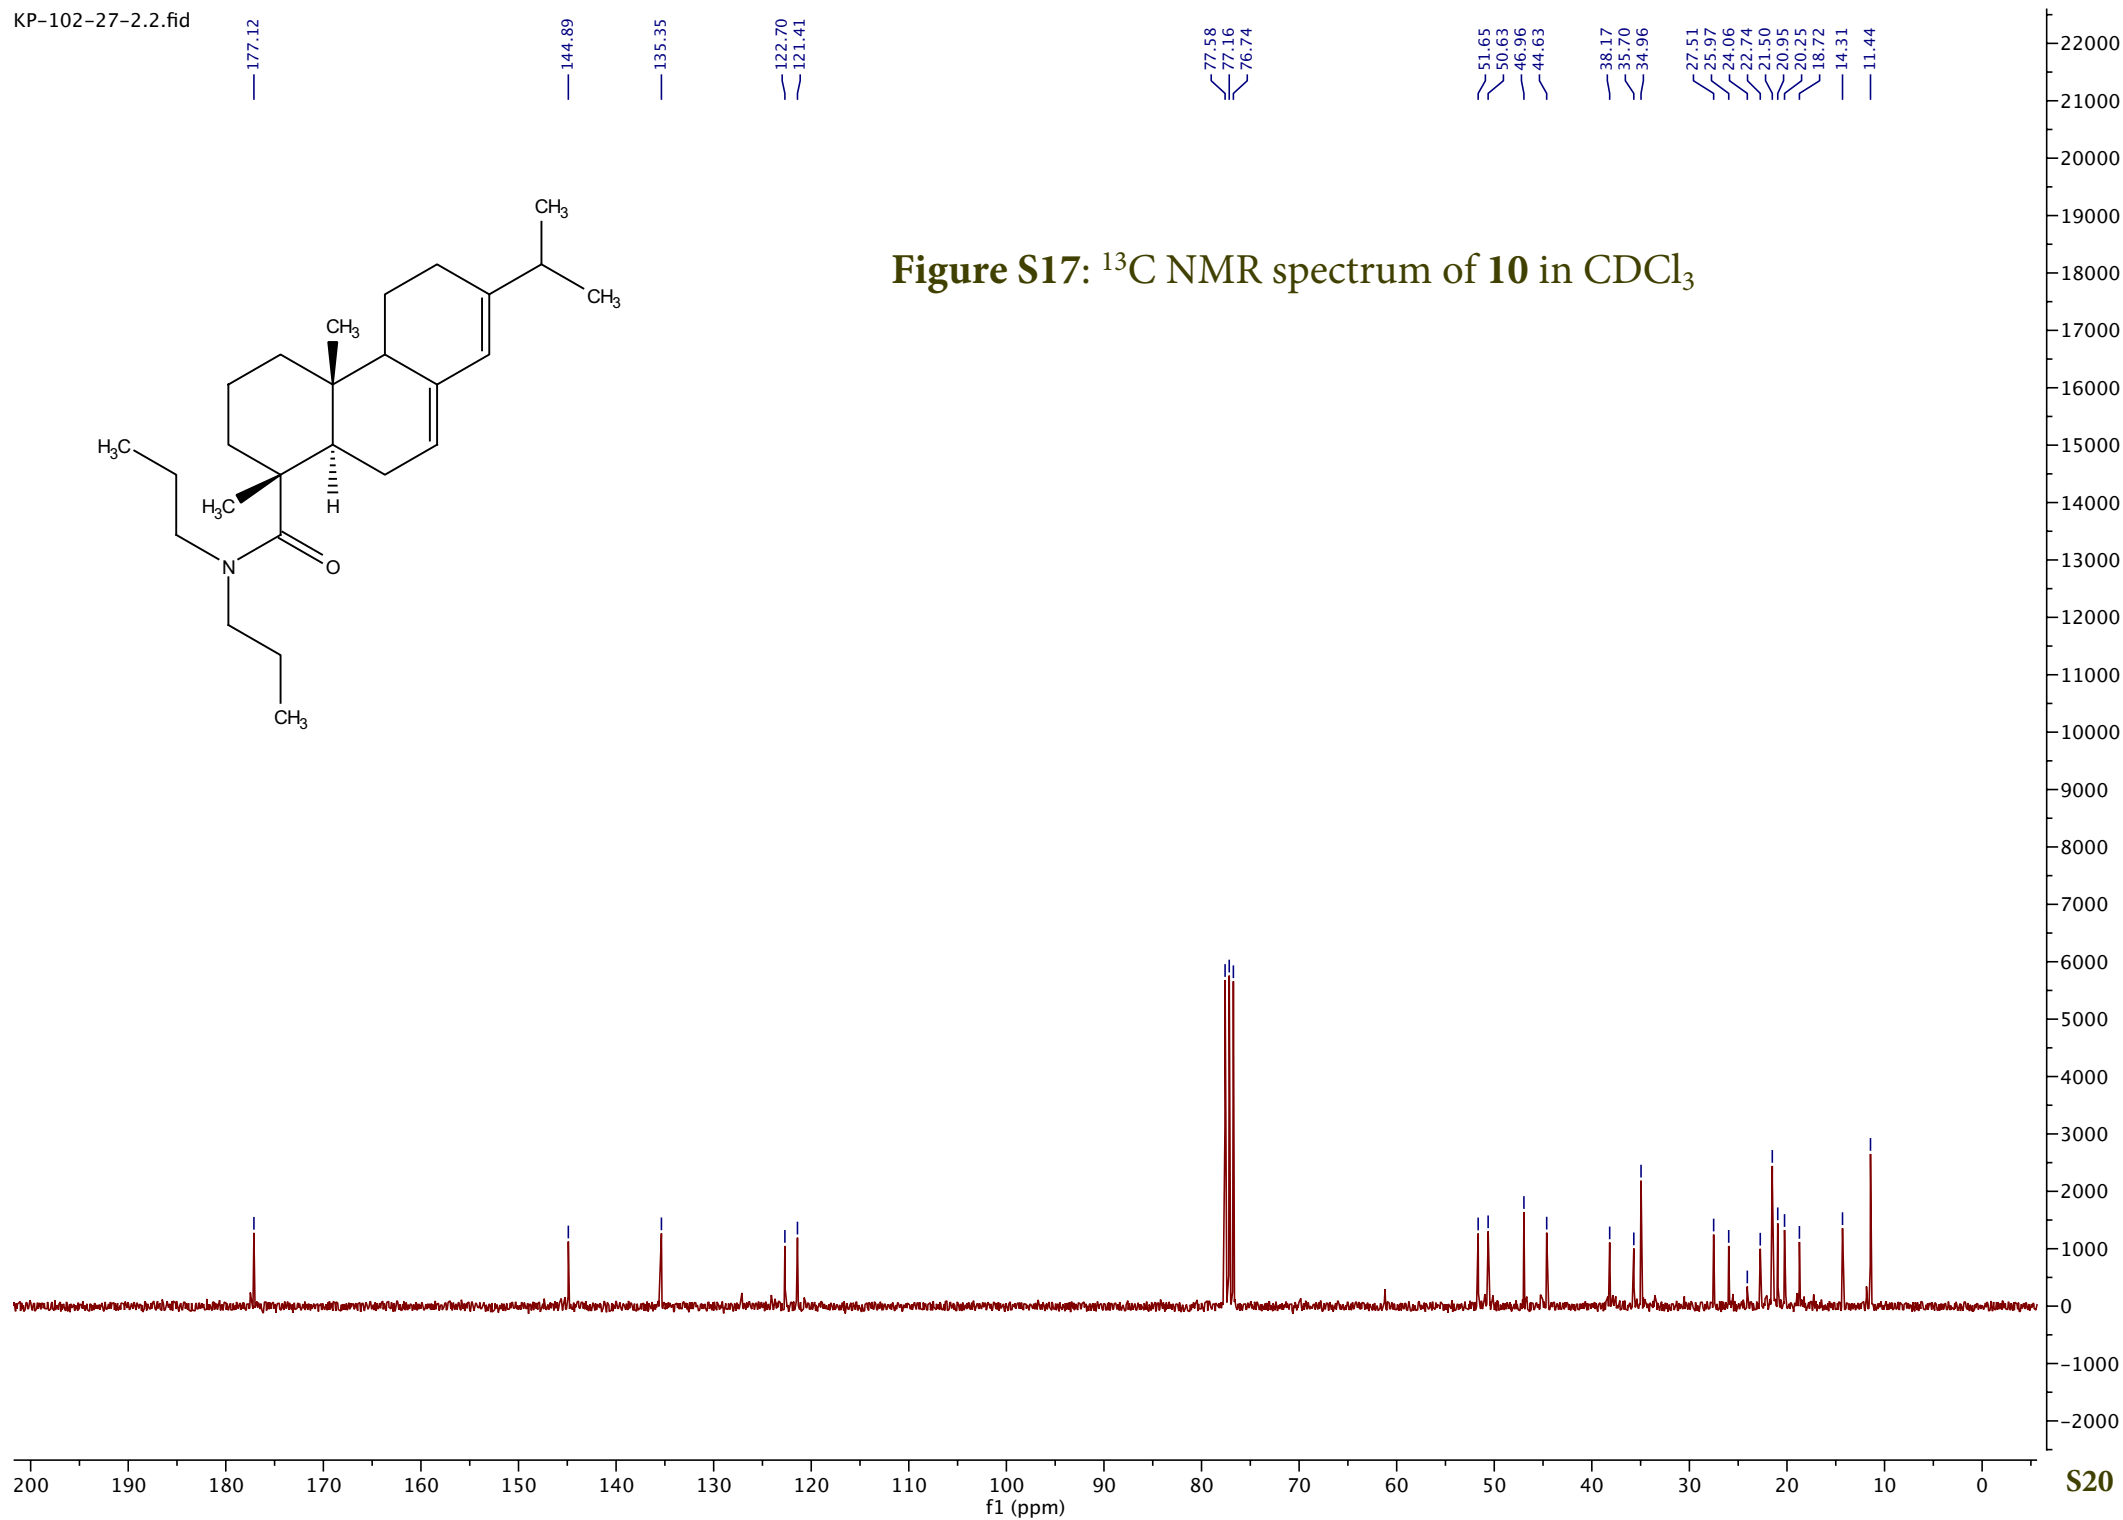

**Figure S18:** High resolution mass spectrum of **10**

| Sample Name | Mol Fomula | MW(COME WITH SAMPLES) | MW(CALCULATED) | M+H      | observed        | delta  | ppm  |
|-------------|------------|-----------------------|----------------|----------|-----------------|--------|------|
| KP-102-27   | C26H43NO   | 385.3345              | 385.33447      | 386.3423 | <b>386.3423</b> | 0.0000 | 0.00 |

KP-102-27 #607 RT: 3.92 AV: 1 NL: 1.02E6  
T: FTMS + c ESI Full ms [300.0000-900.0000]

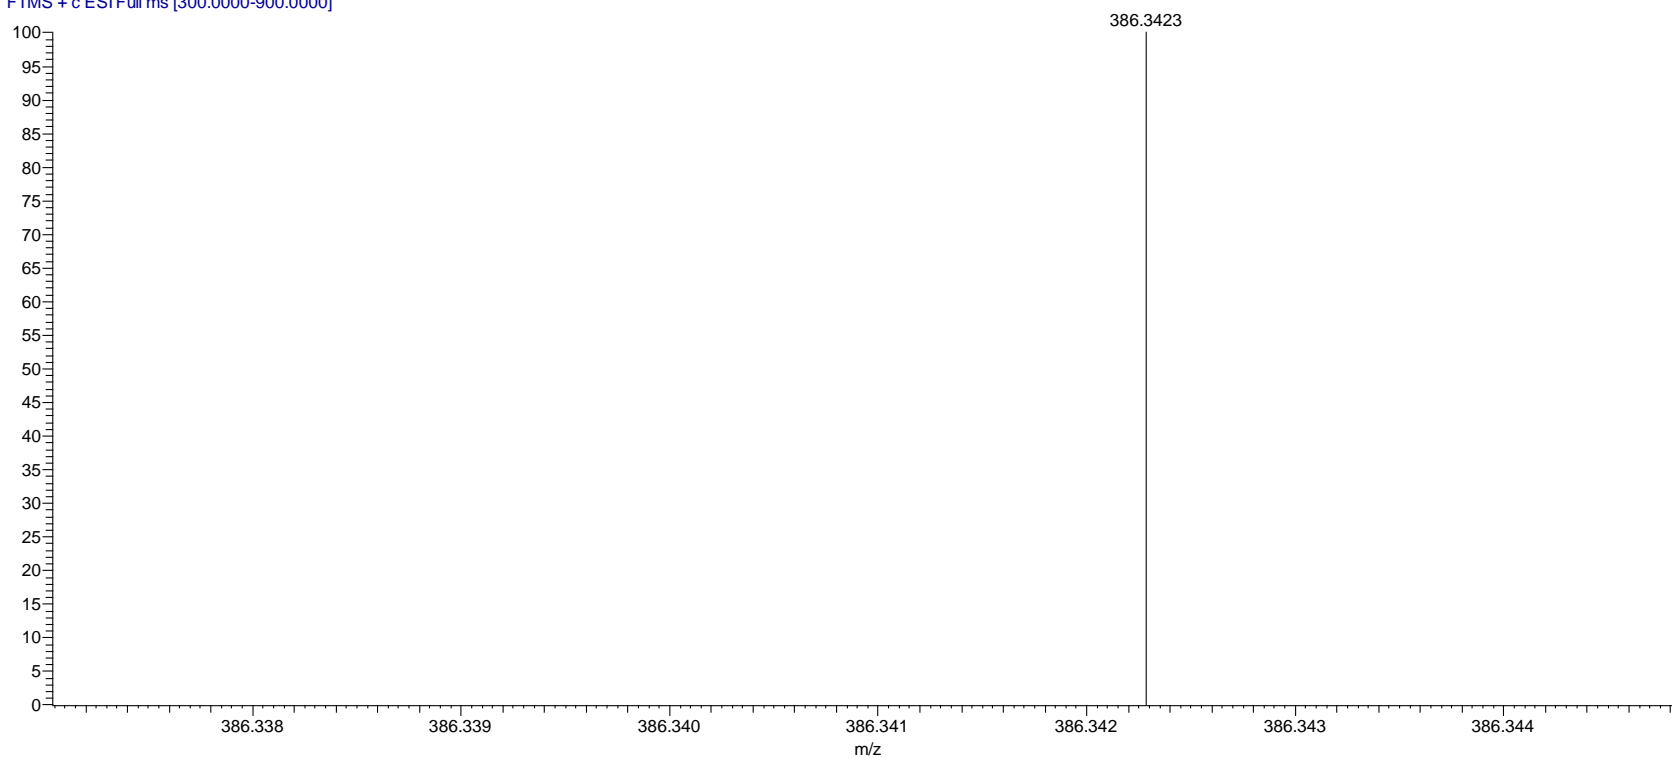

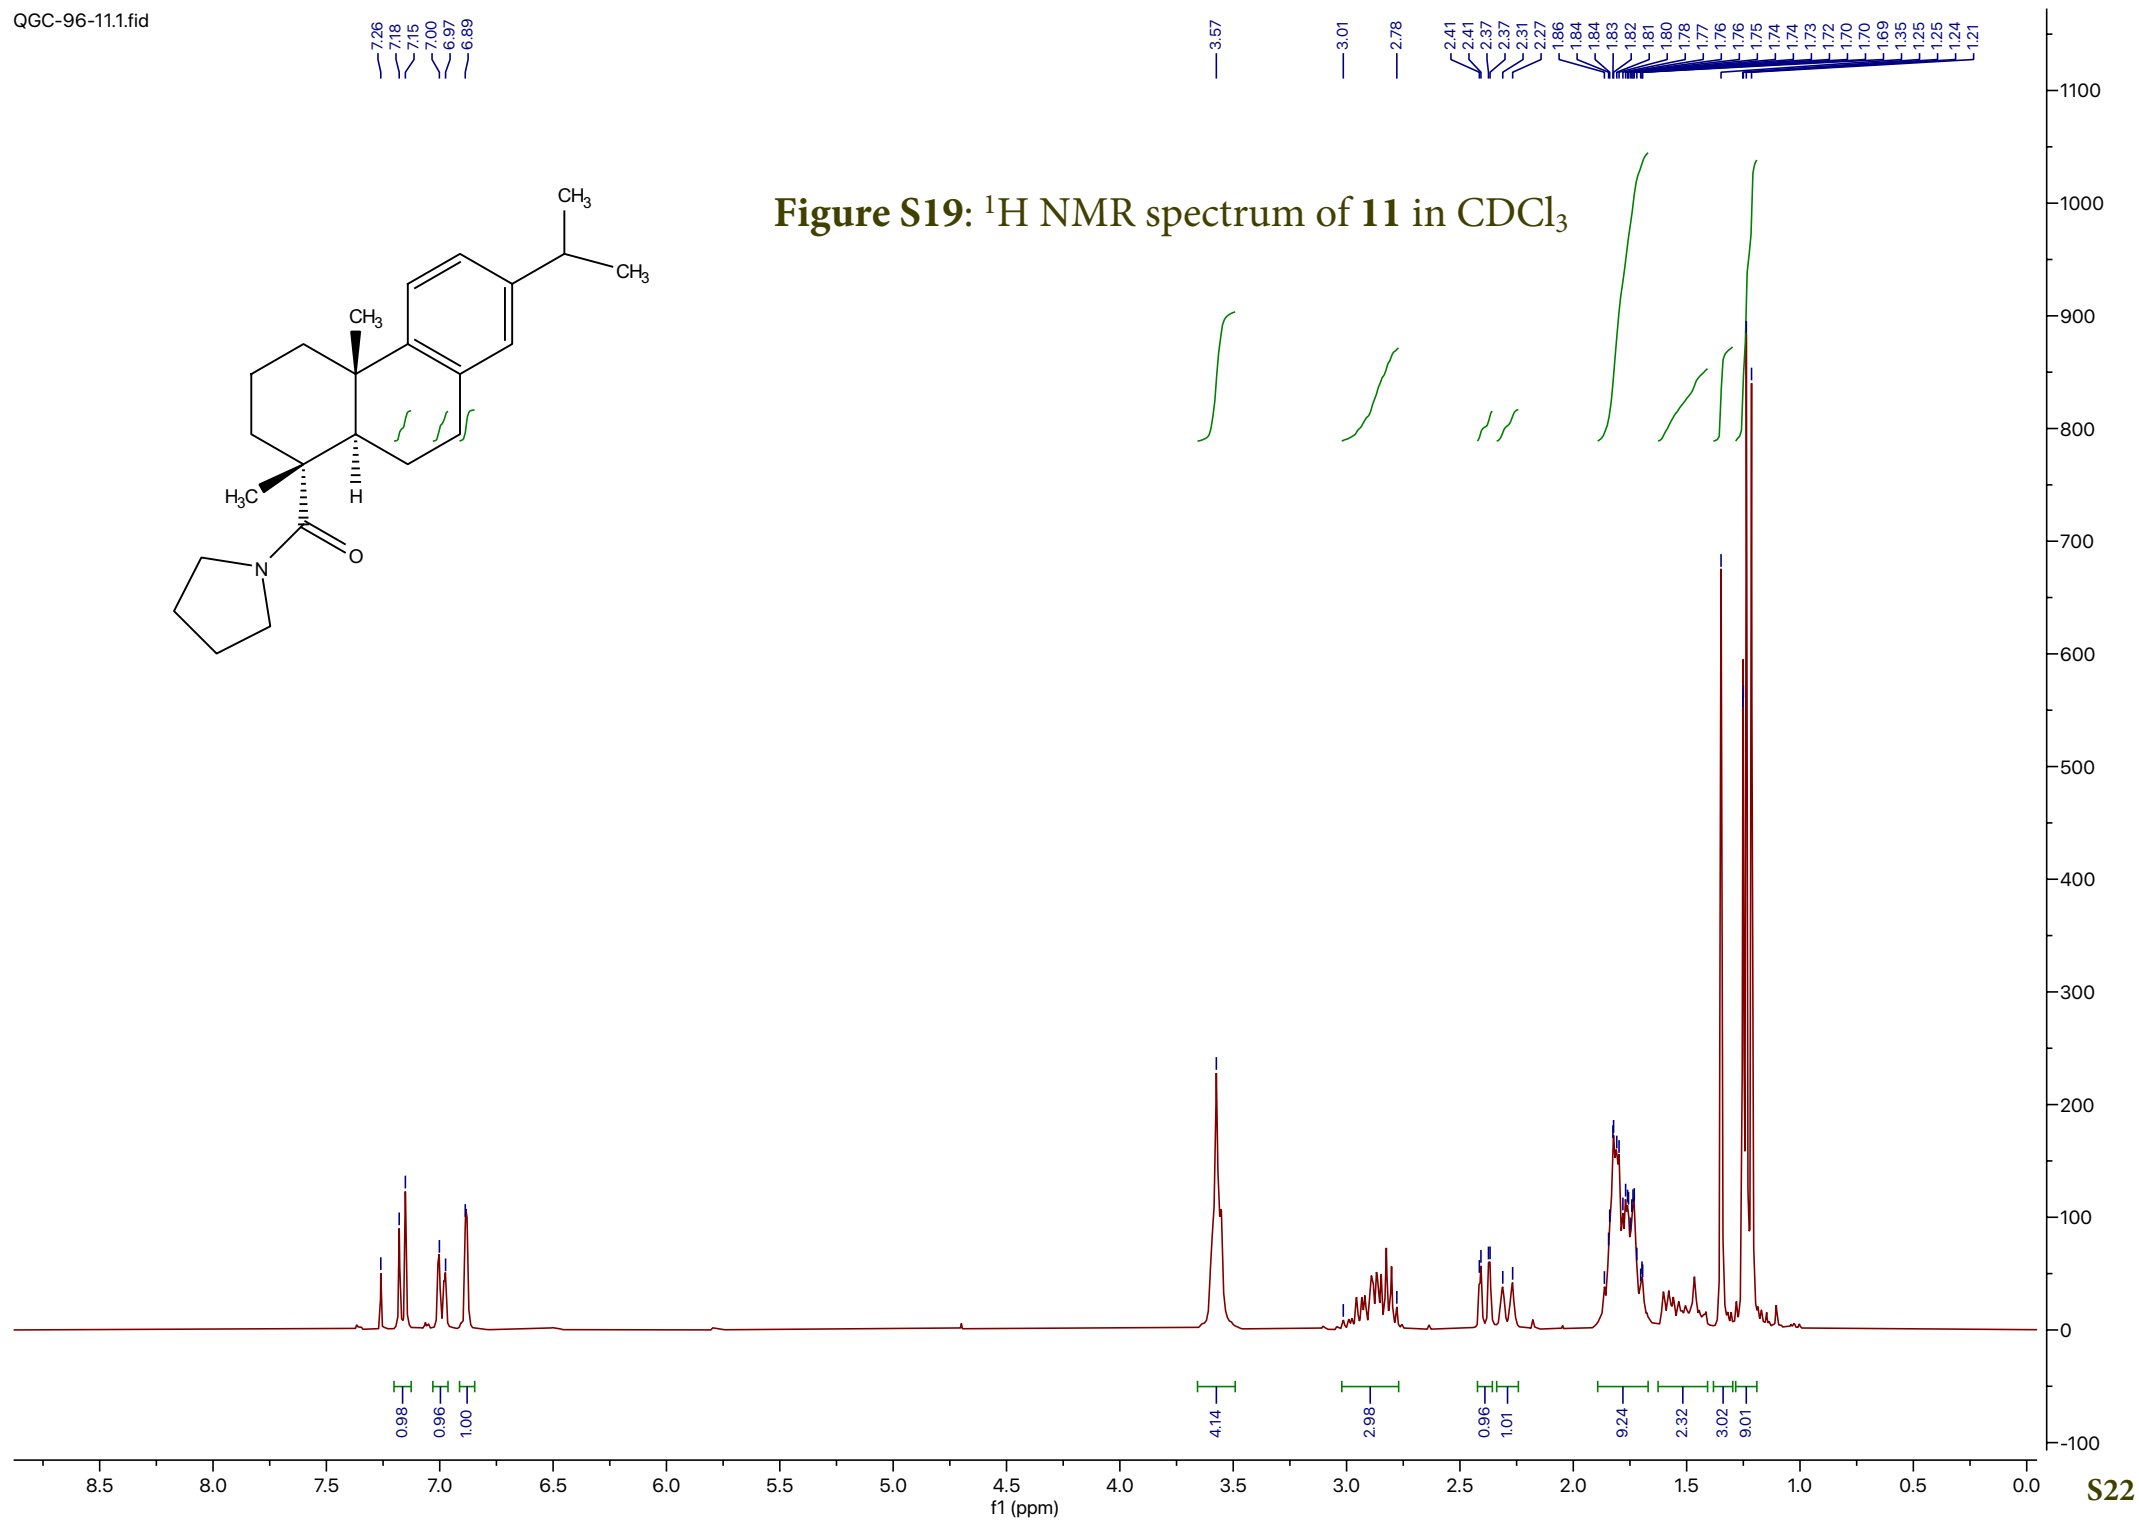

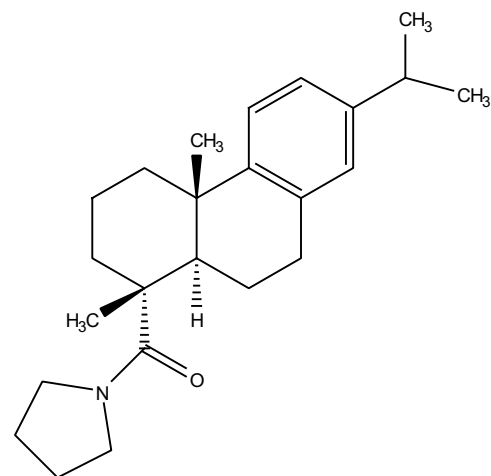

**Figure S20:**  $^{13}\text{C}$  NMR spectrum of **11** in  $\text{CDCl}_3$

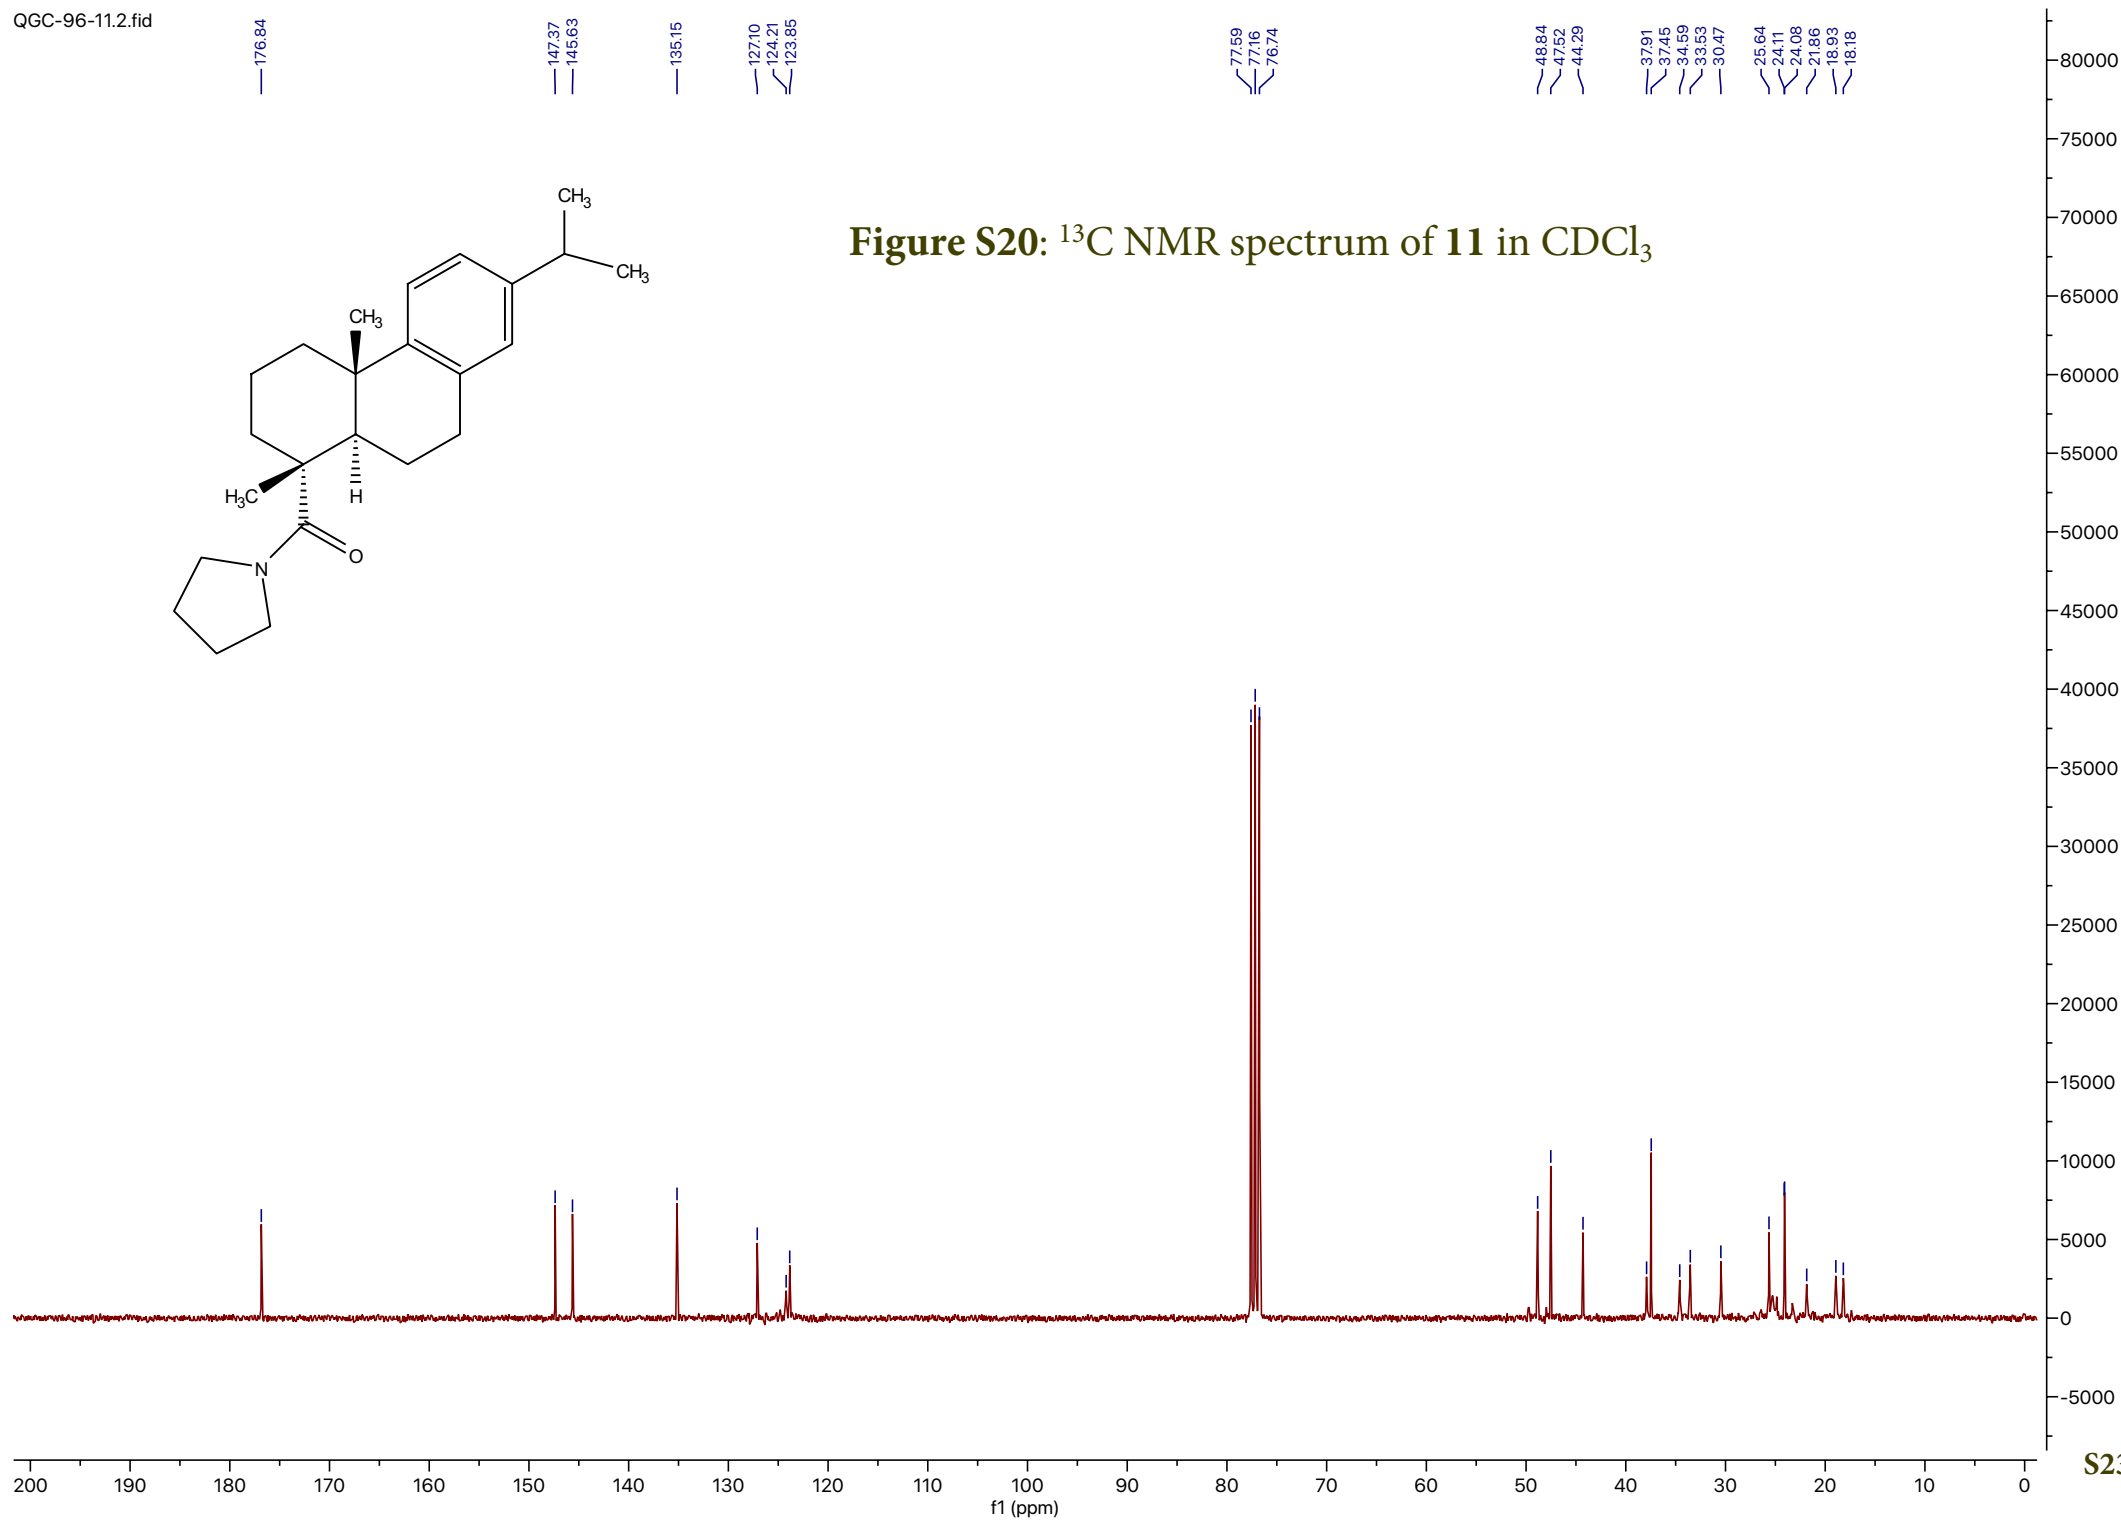

**Figure S21:** High resolution mass spectrum of **11**

| Sample Name | Mol Fomula                         | MW       | M+H      | observed | delta   | ppm   |
|-------------|------------------------------------|----------|----------|----------|---------|-------|
| IS-78-67    | C <sub>24</sub> H <sub>35</sub> NO | 353.2719 | 354.2797 | 354.2796 | -0.0001 | -0.17 |

IS-78-67- #2667-2691 RT: 14.42-14.55 AV: 25 NL: 5.73E5  
T: FTMS + c NSI Full ms [120.0000-750.0000]

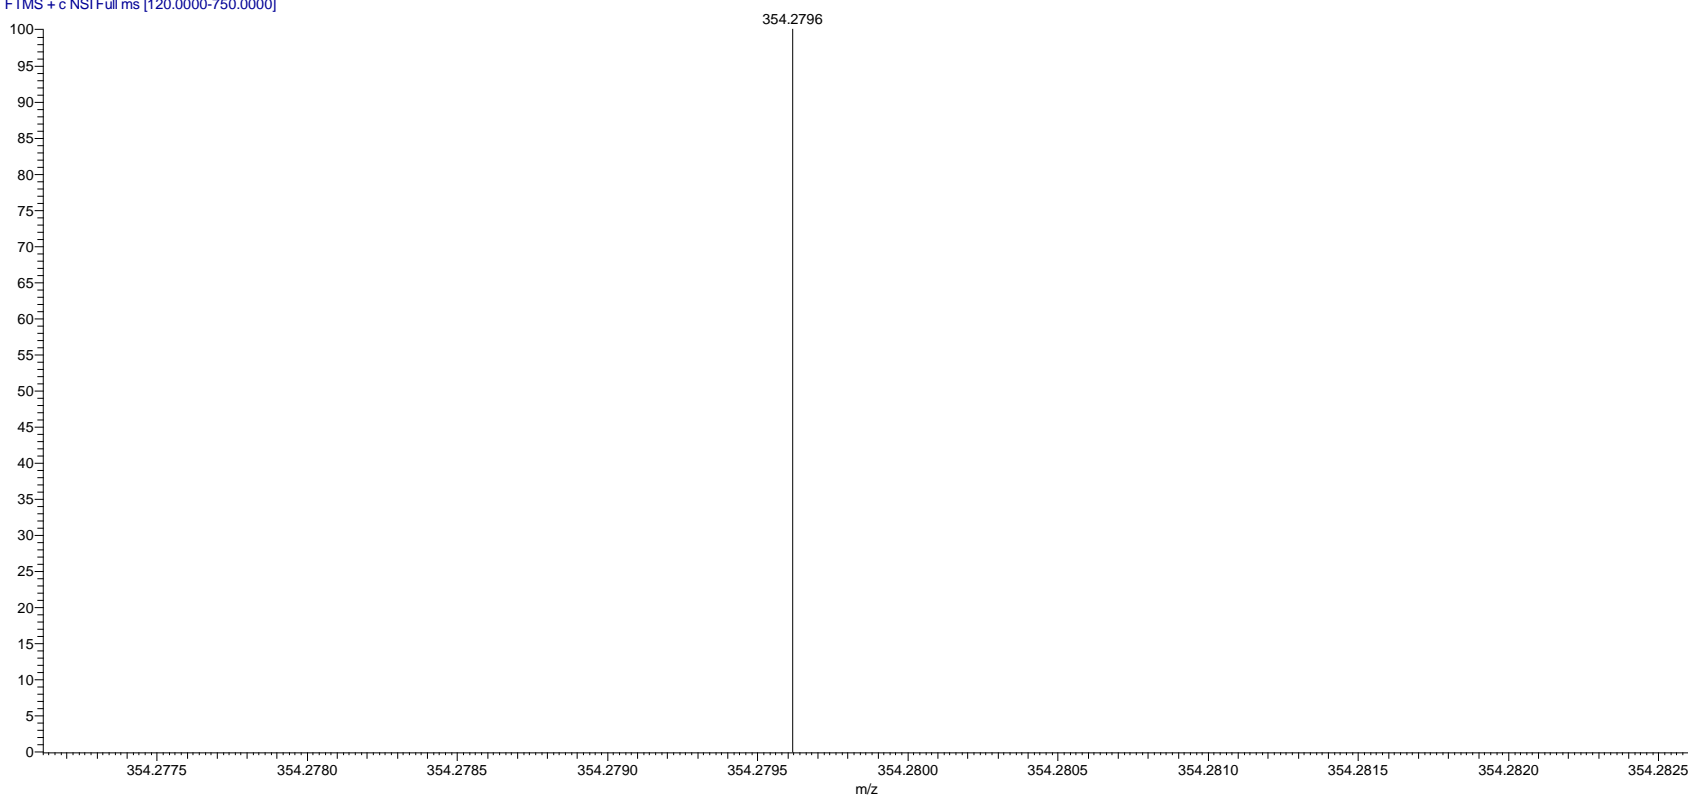



7.260  
7.175  
7.147  
7.006  
6.979  
6.900

3.652  
3.587  
3.507

3.058  
3.002  
2.939  
2.895  
2.826  
2.757

2.371  
2.332  
2.248

1.838  
1.756  
1.697  
1.651  
1.619  
1.594  
1.577  
1.550  
1.443  
1.407  
1.340  
1.250  
1.239  
1.216

**Figure S22:**  $^1\text{H}$  NMR spectrum of **12** in  $\text{CDCl}_3$

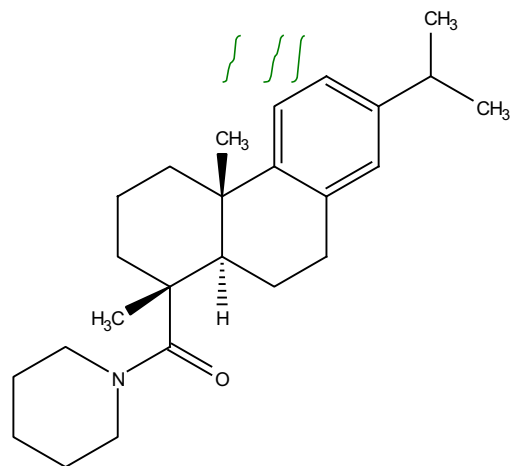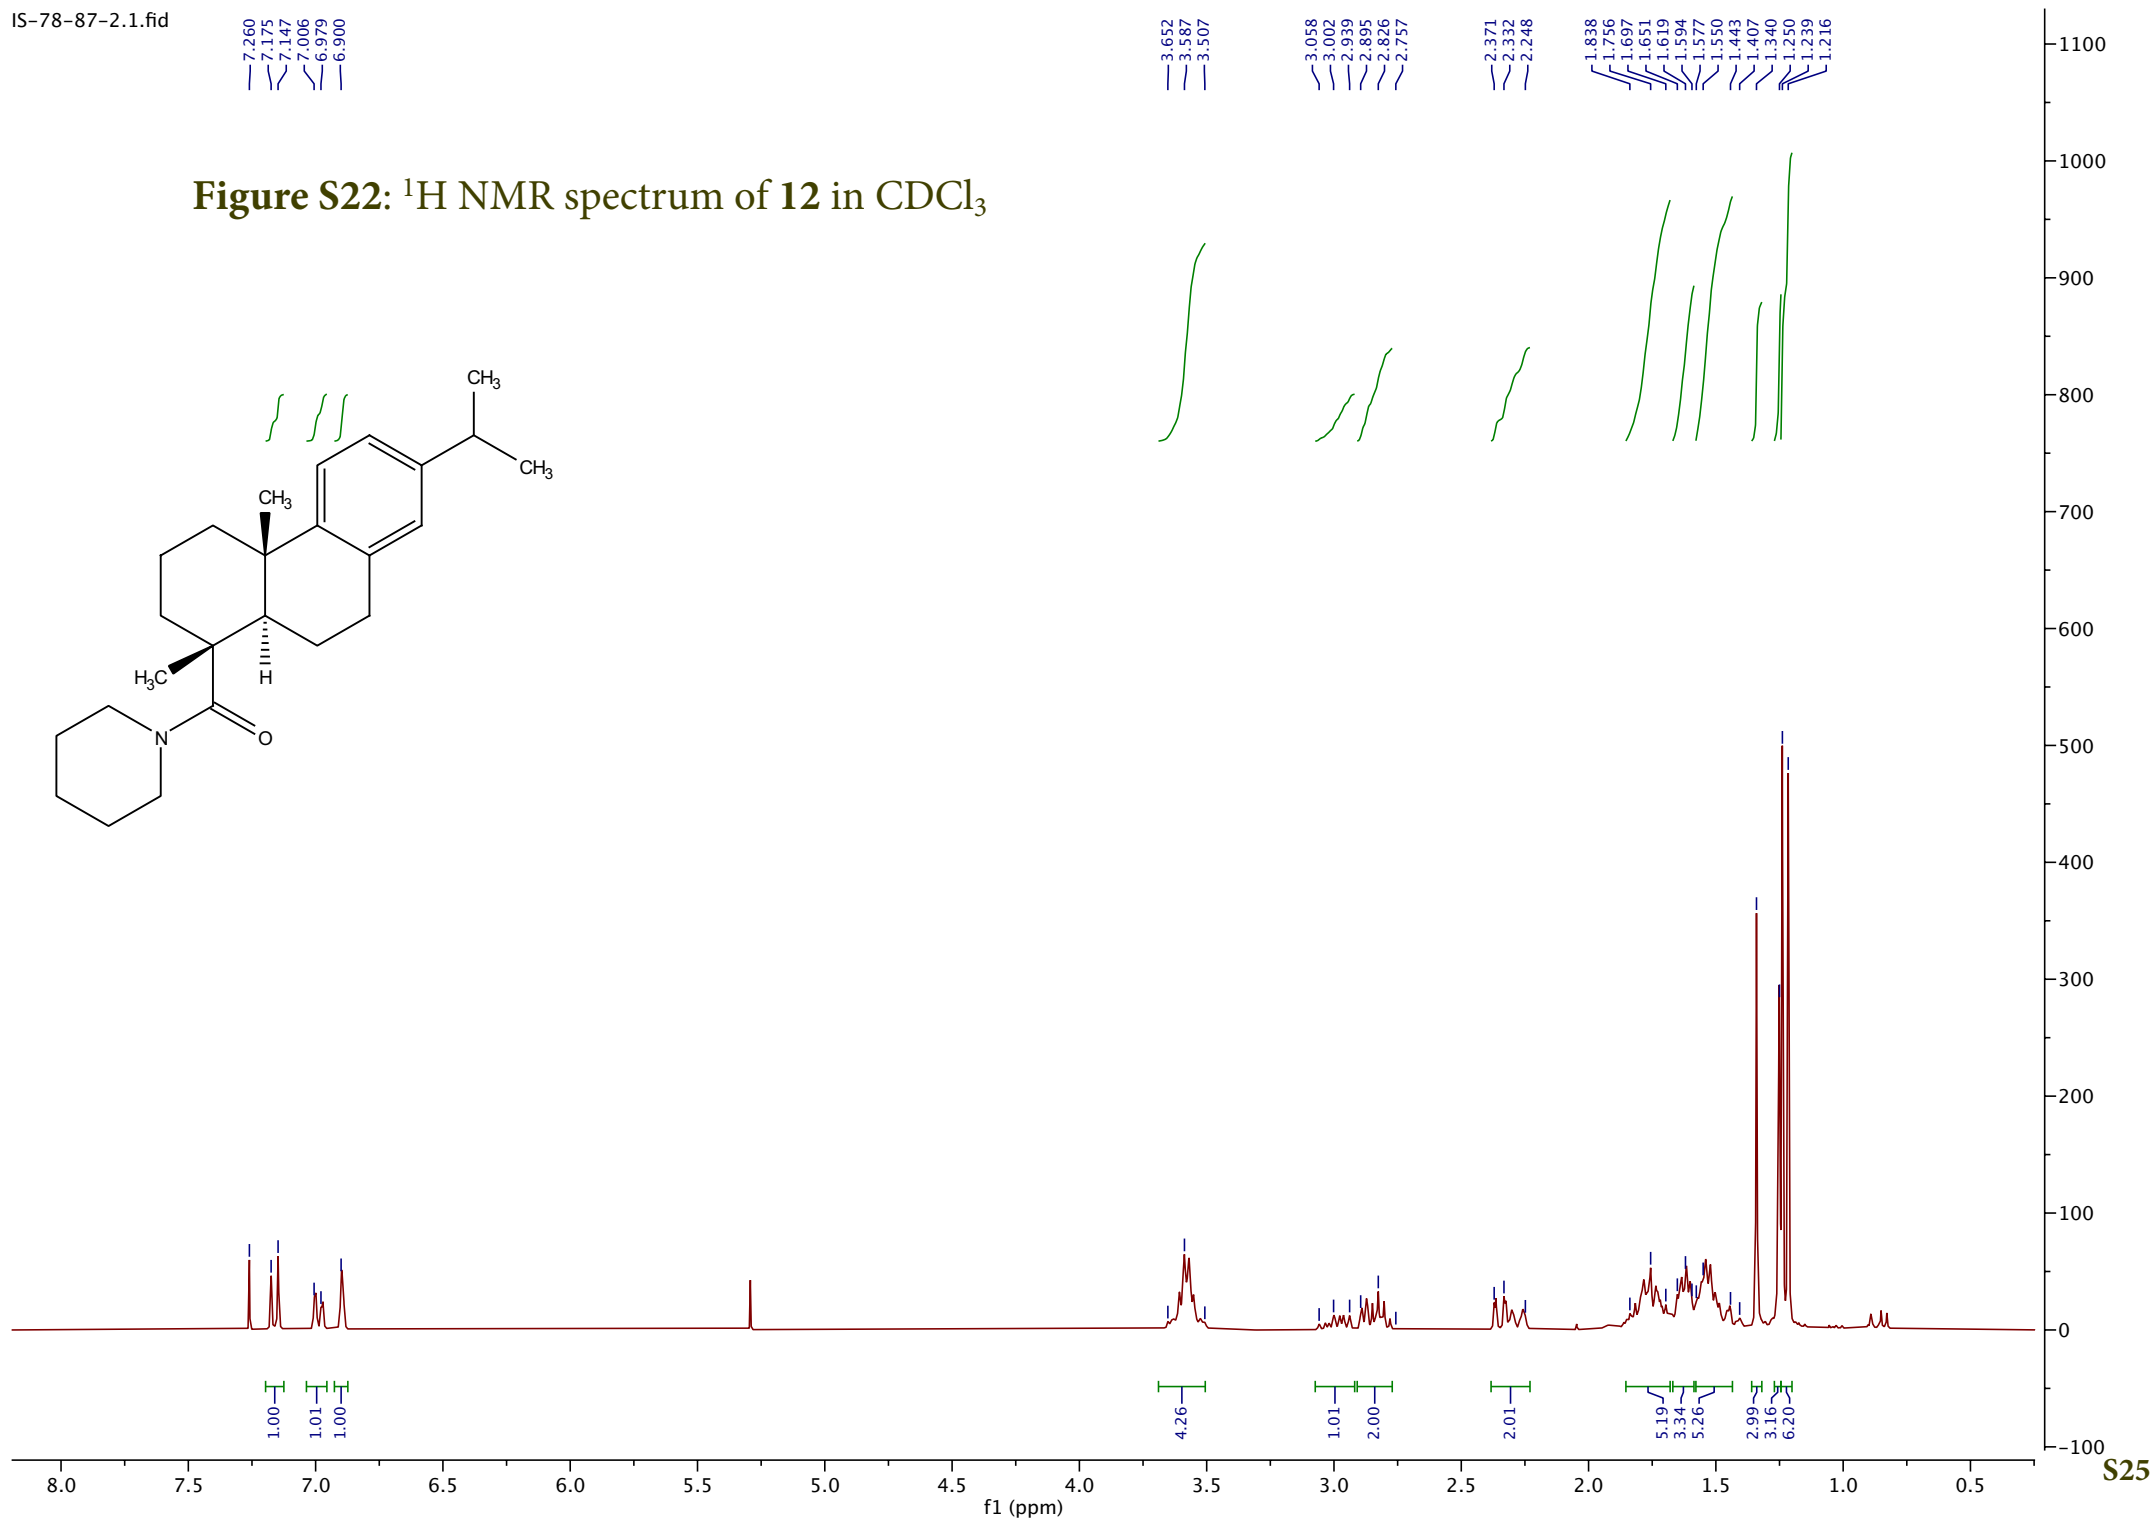

177.02

147.25  
145.62

135.36

127.19  
124.24  
123.8077.58  
77.16  
76.7447.20  
46.88  
45.4037.81  
37.60  
35.33  
33.55

30.81

26.37  
25.67  
24.89  
24.11  
24.08  
22.26  
19.05**Figure S23:**  $^{13}\text{C}$  NMR spectrum of **12** in  $\text{CDCl}_3$ 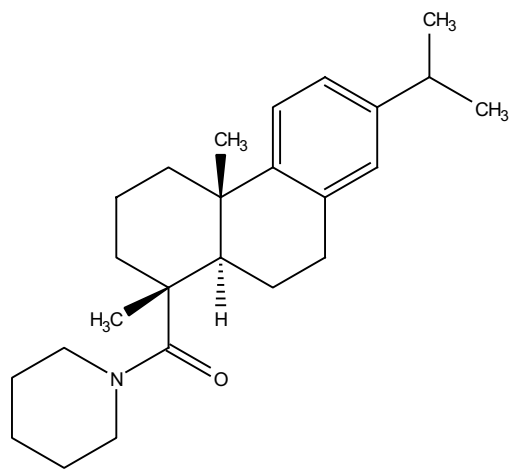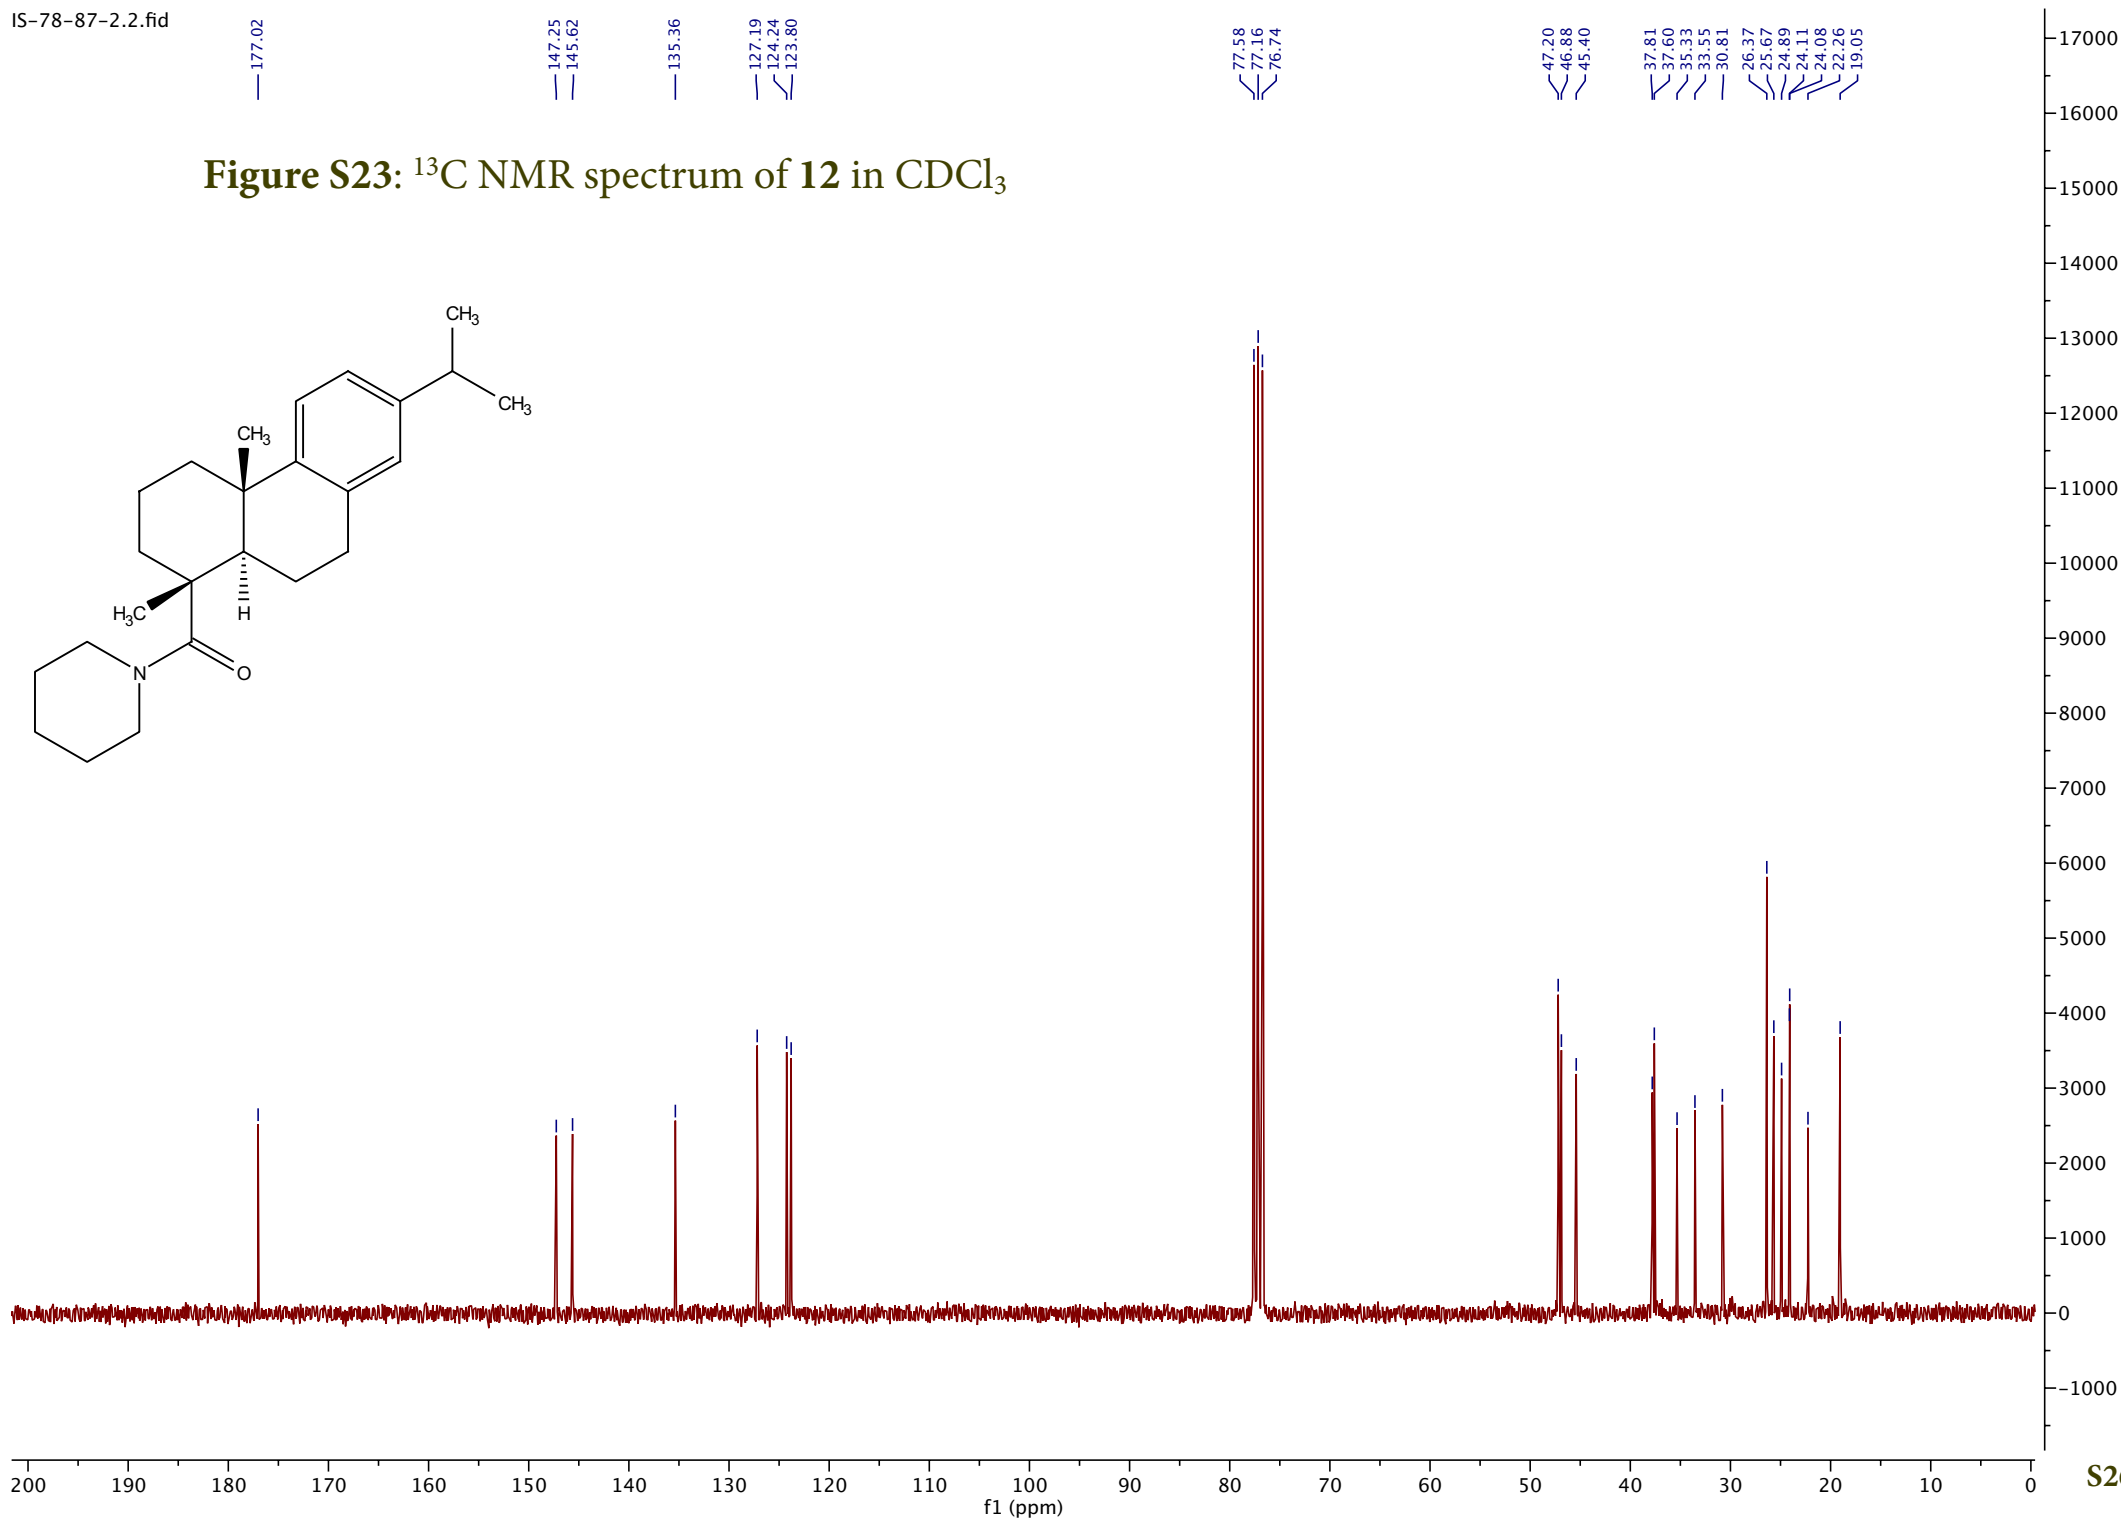

**Figure S24:** High resolution mass spectrum of **12**

| Sample Name | Mol Fomula | MW       | M+H      | observed | delta   | ppm   |
|-------------|------------|----------|----------|----------|---------|-------|
| IS-78-69    | C25H37NO   | 367.2875 | 368.2953 | 368.2948 | -0.0005 | -1.38 |

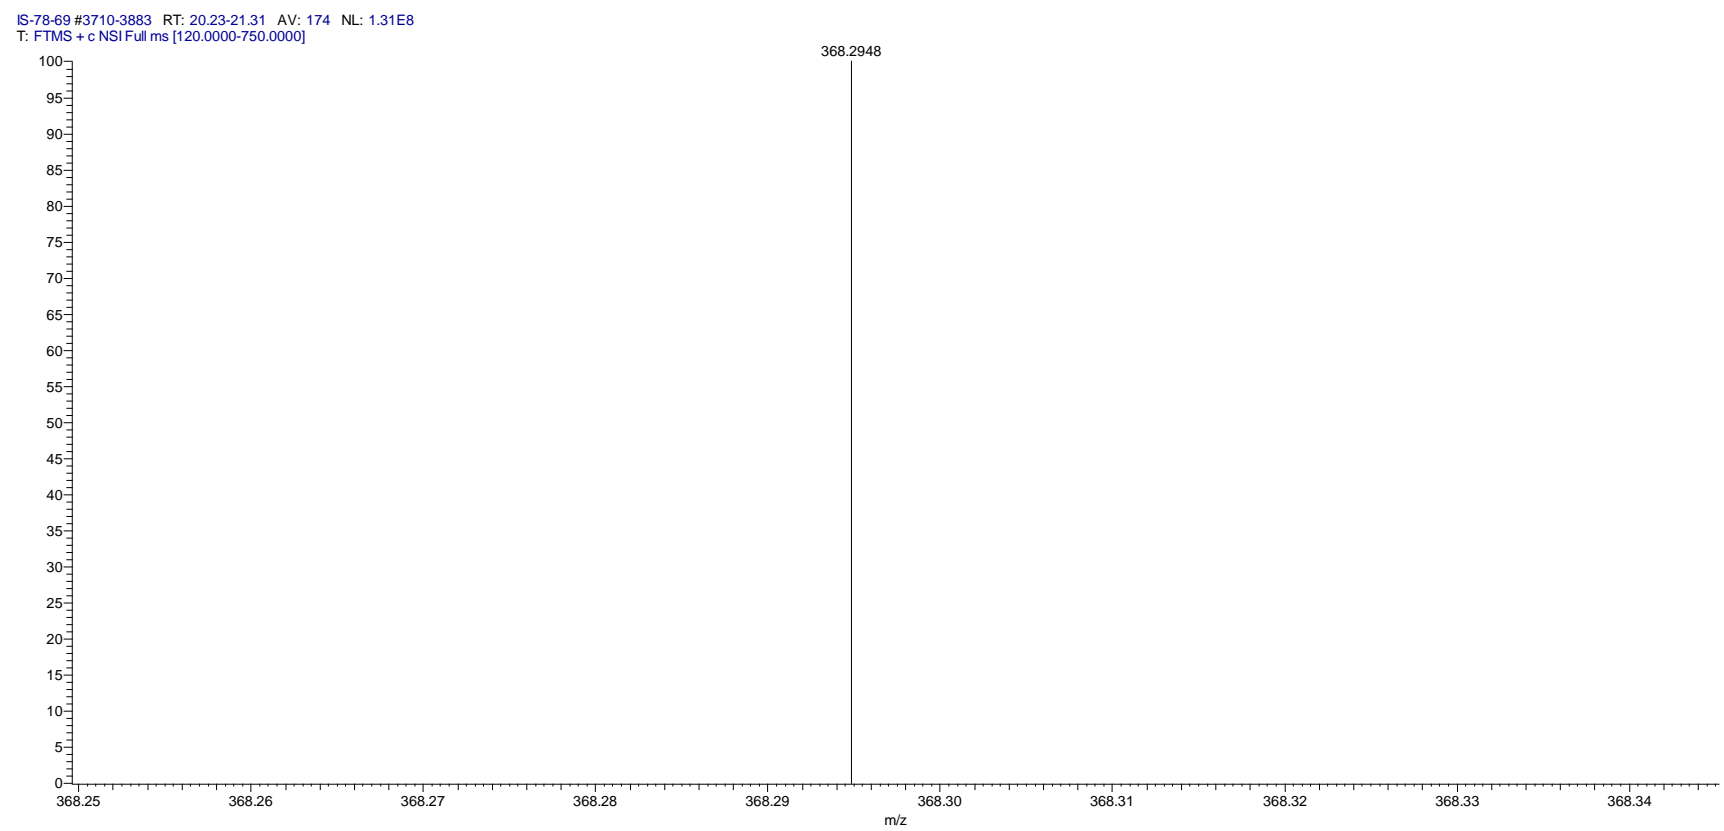

**Figure S25:**  $^1\text{H}$  NMR spectrum of **13** in  $\text{CDCl}_3$ 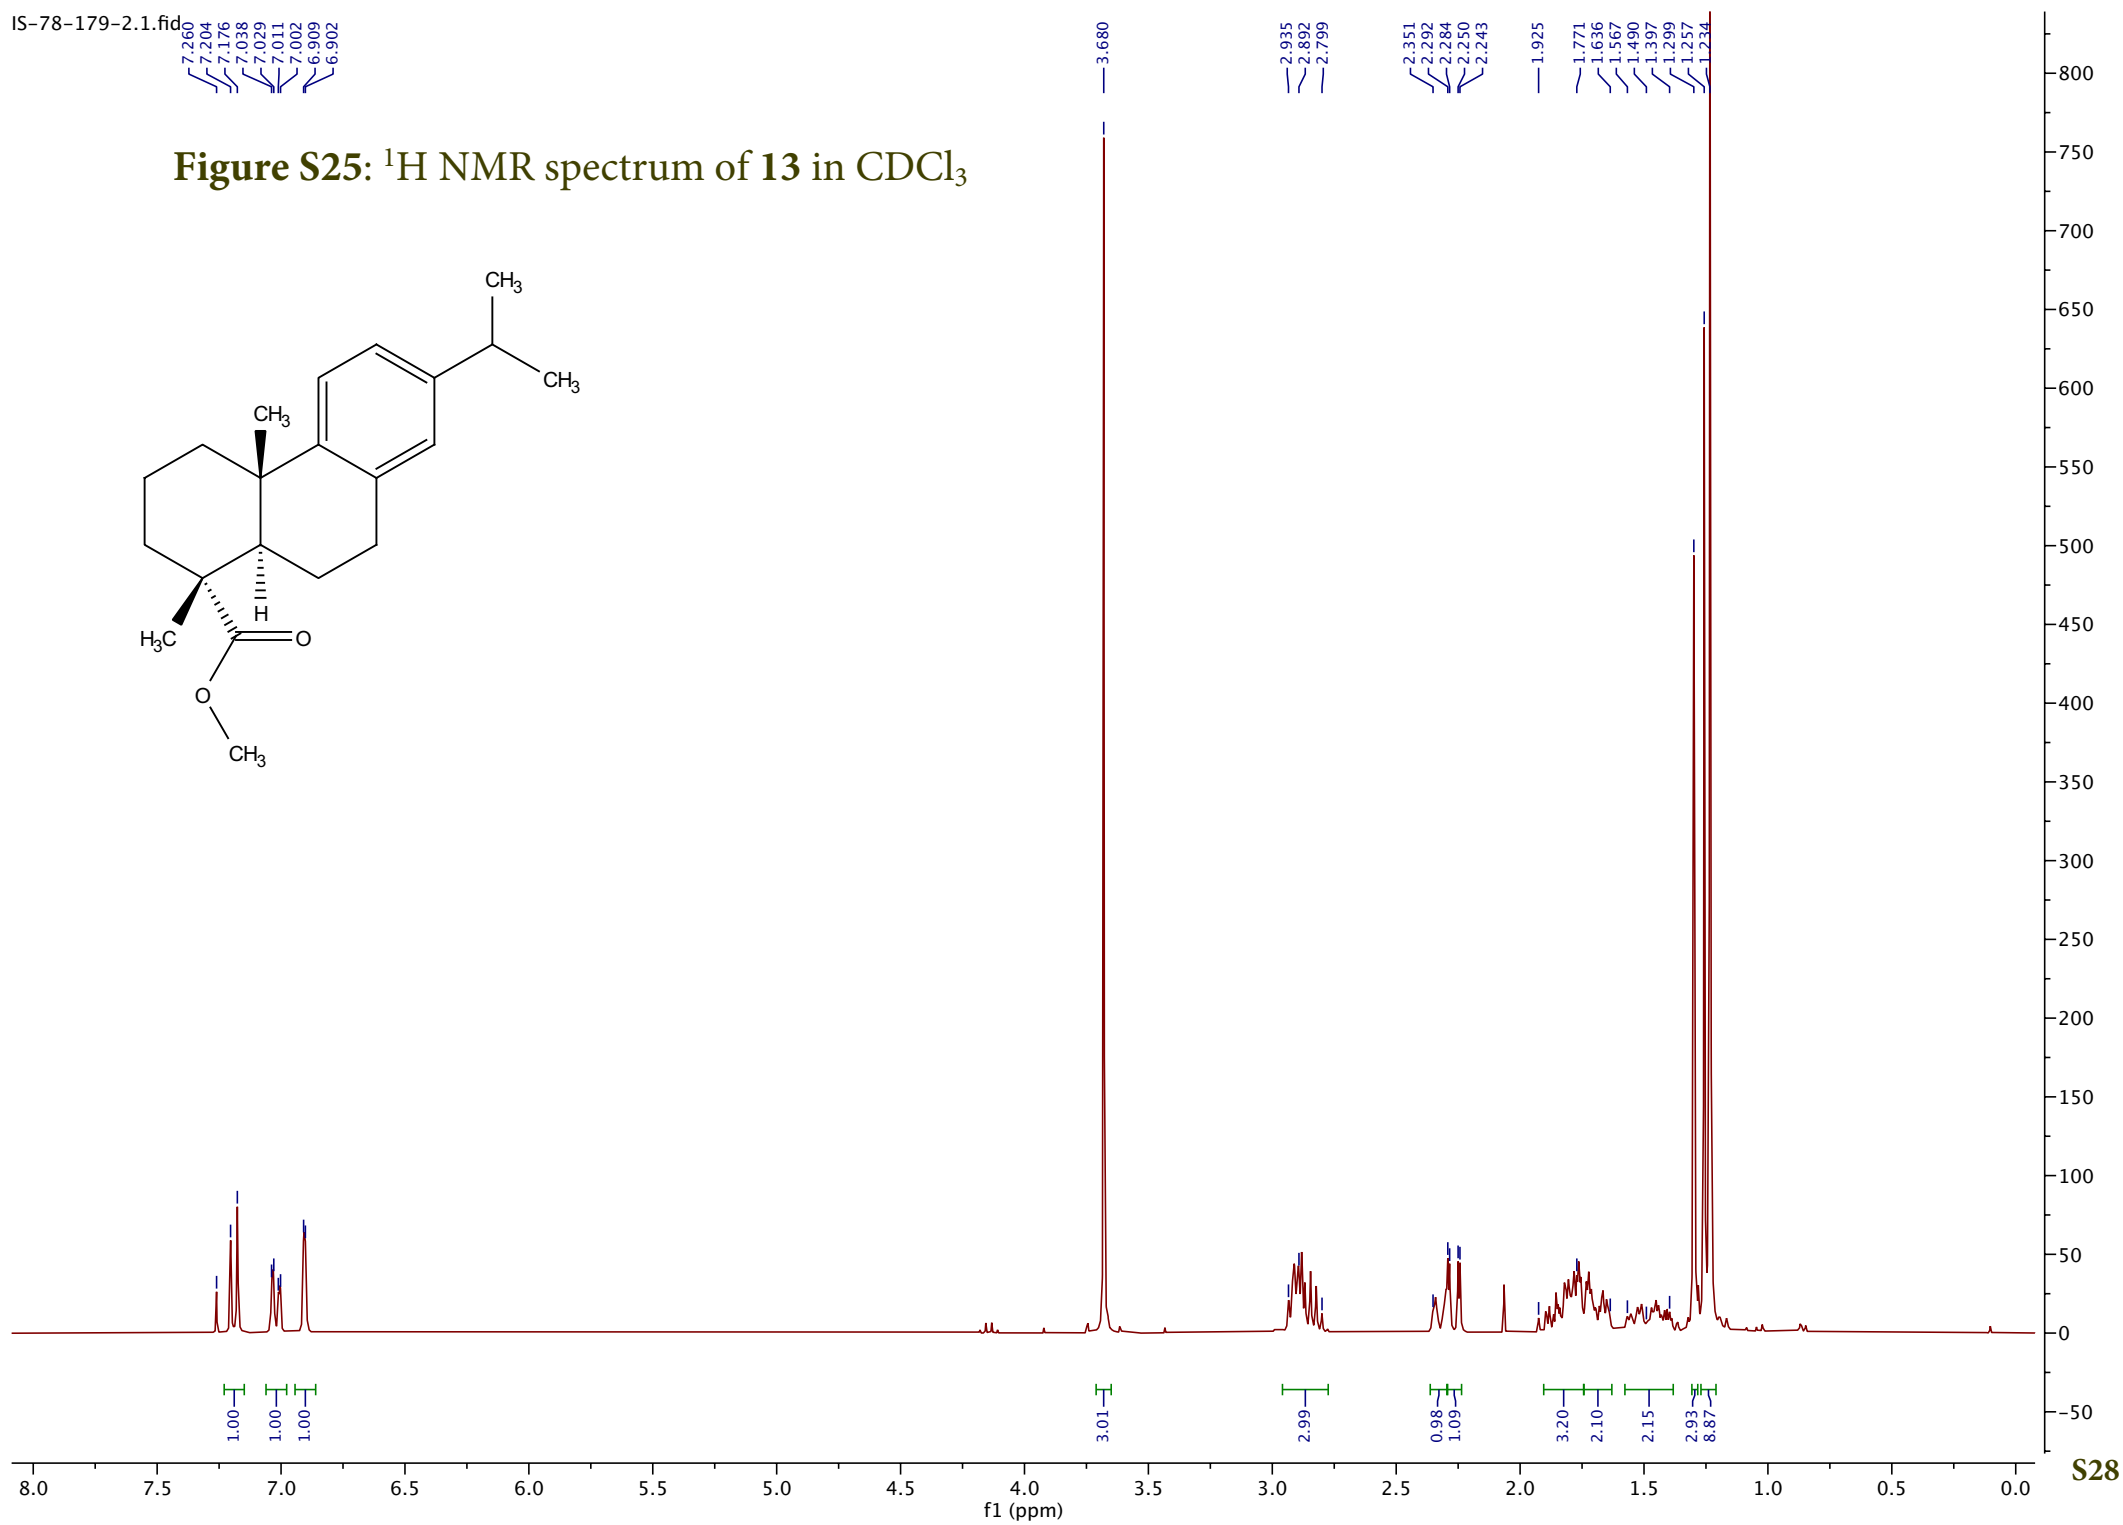

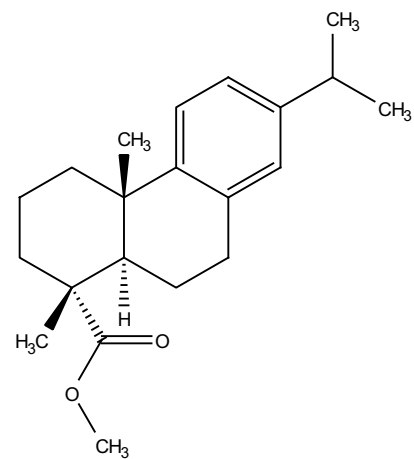

**Figure S26:** <sup>13</sup>C NMR spectrum of **13** in CDCl<sub>3</sub>

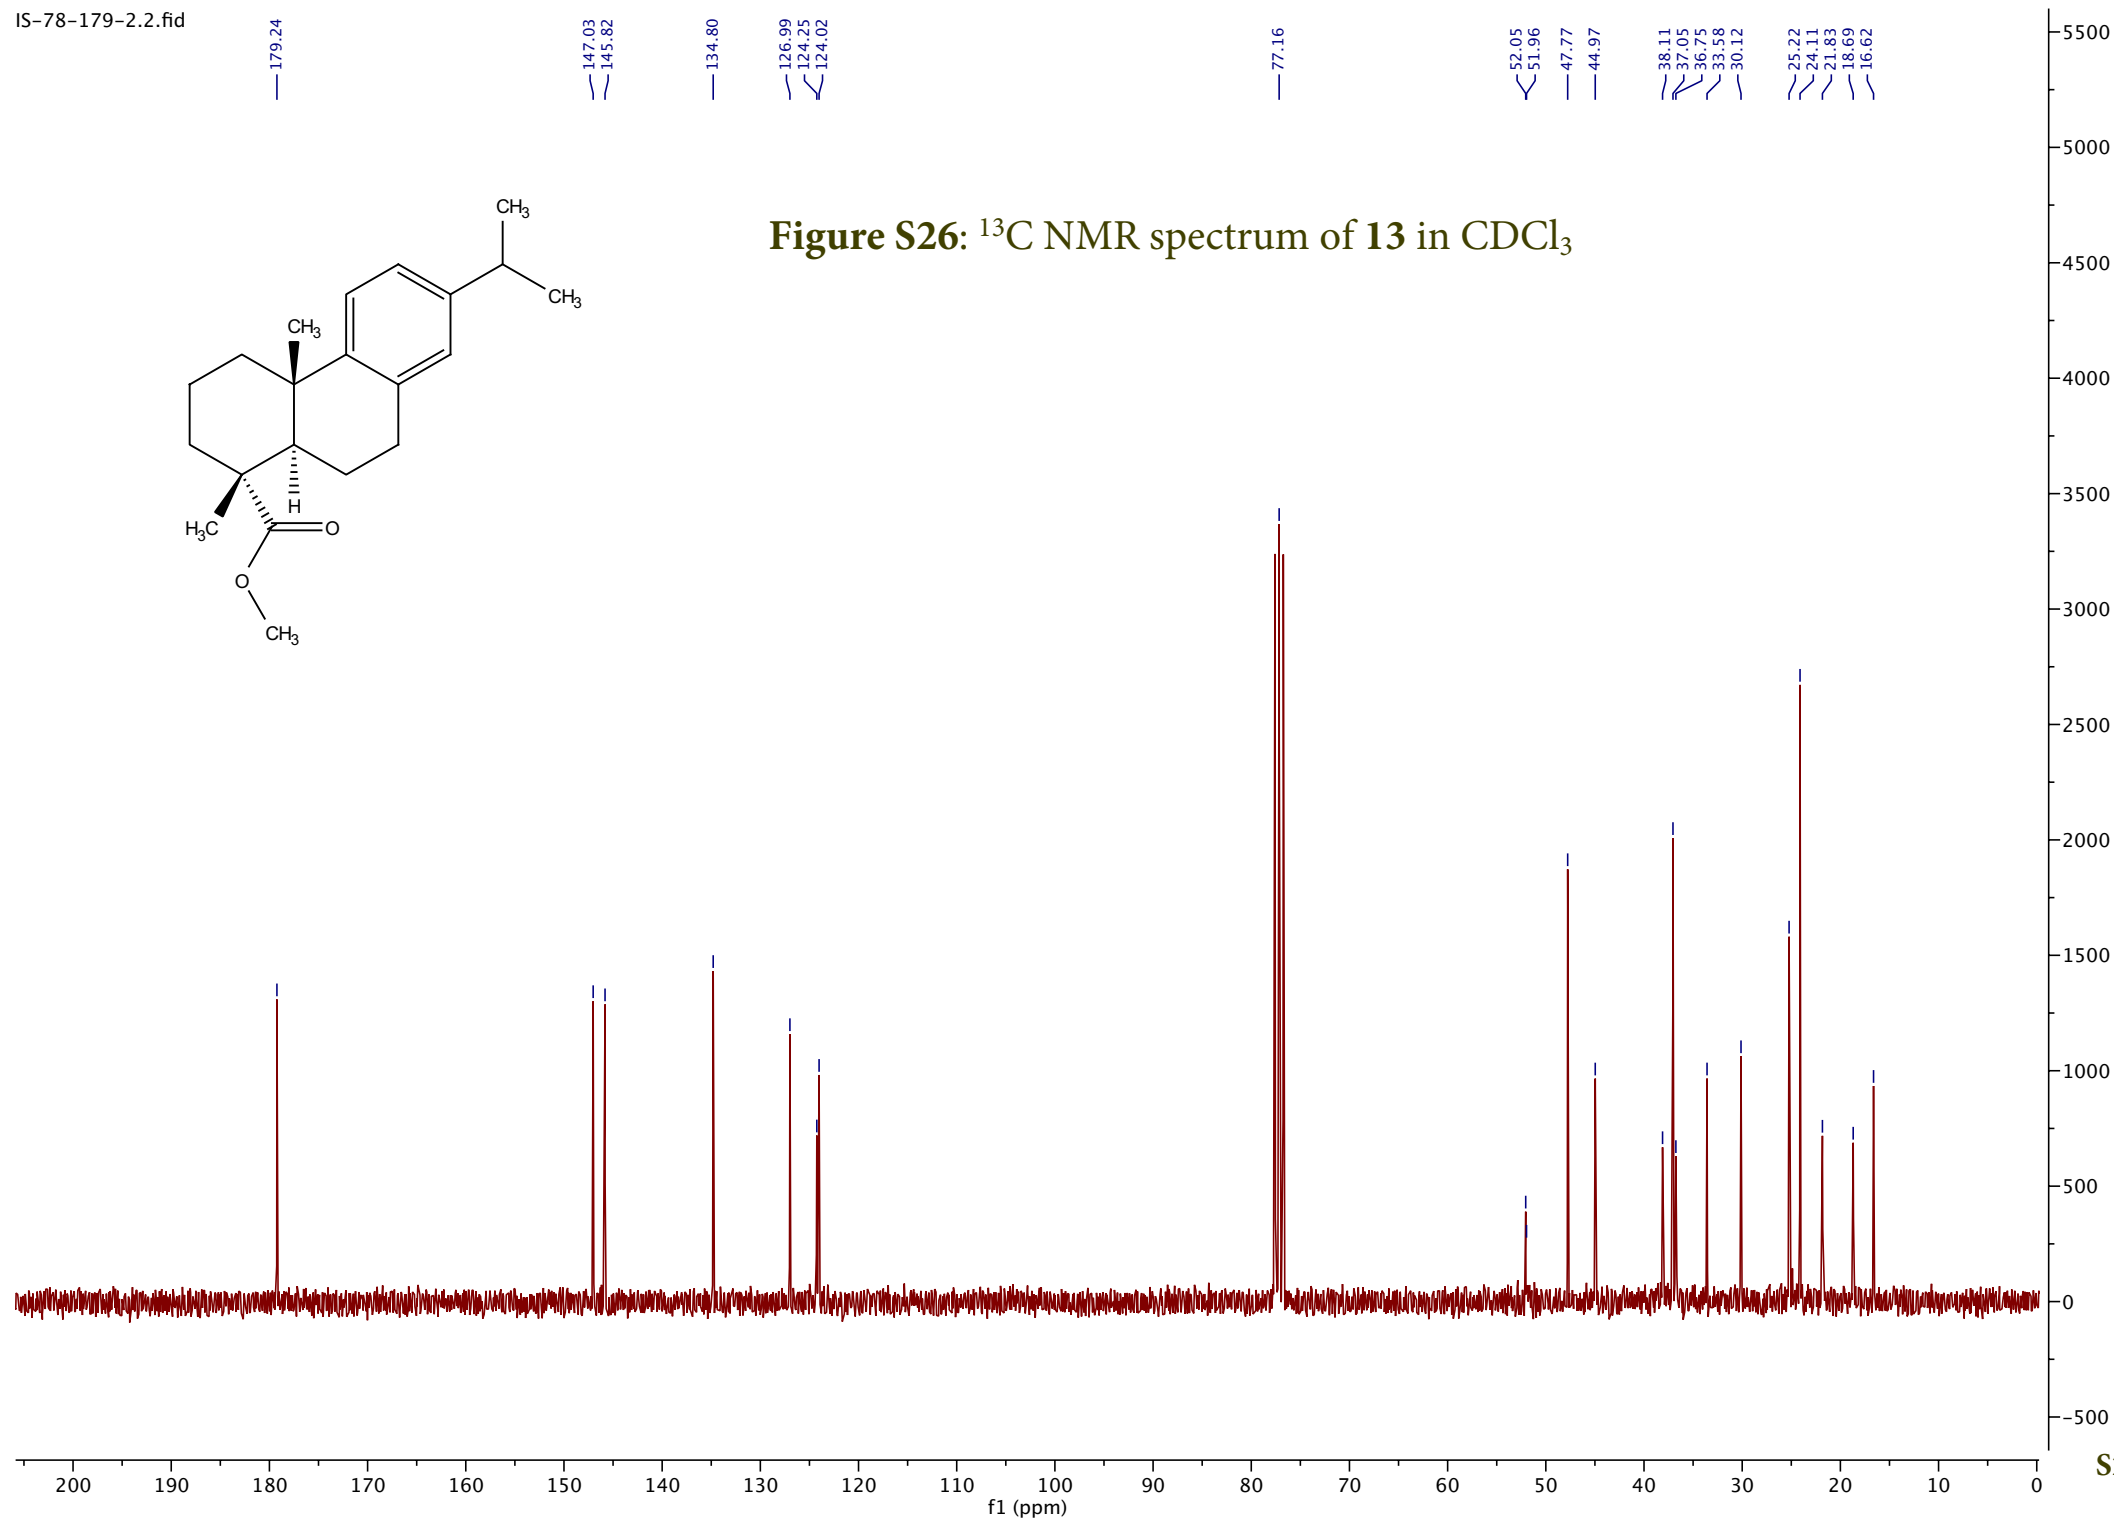

**Figure S27:** High resolution mass spectrum of **13**

| Sample Name | Mol Fomula | MW       | M+H      | observed | delta   | ppm   |
|-------------|------------|----------|----------|----------|---------|-------|
| IS-78-179-2 | C21H31O2   | 314.2246 | 315.2324 | 315.2321 | -0.0003 | -0.92 |

IS-78-179-2 #2765-2885 RT: 14.49-15.12 AV: 121 NL: 1.98E7  
T: FTMS + c NSI Full ms [100.0000-1000.0000]

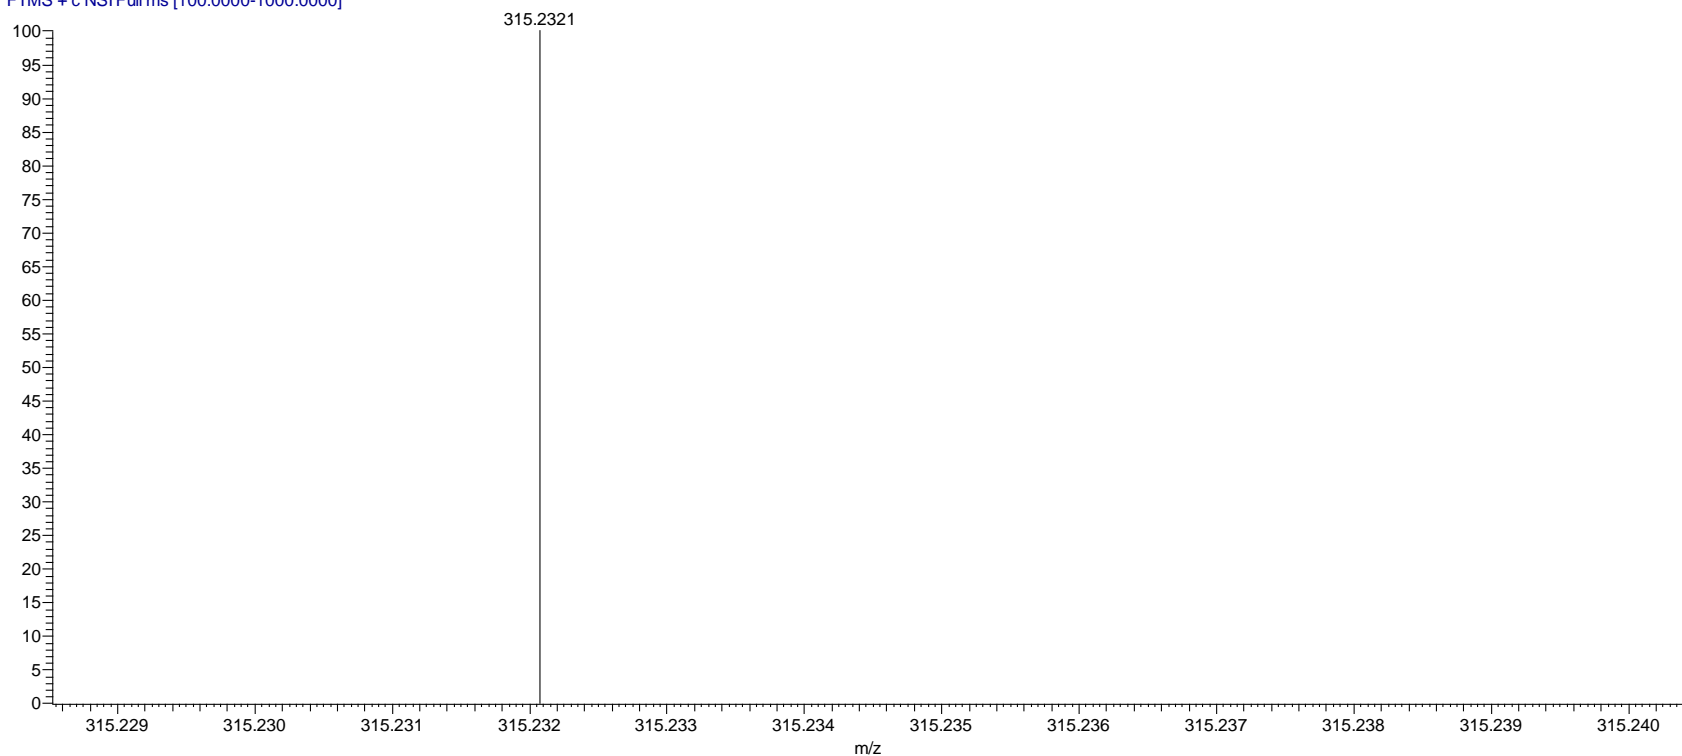

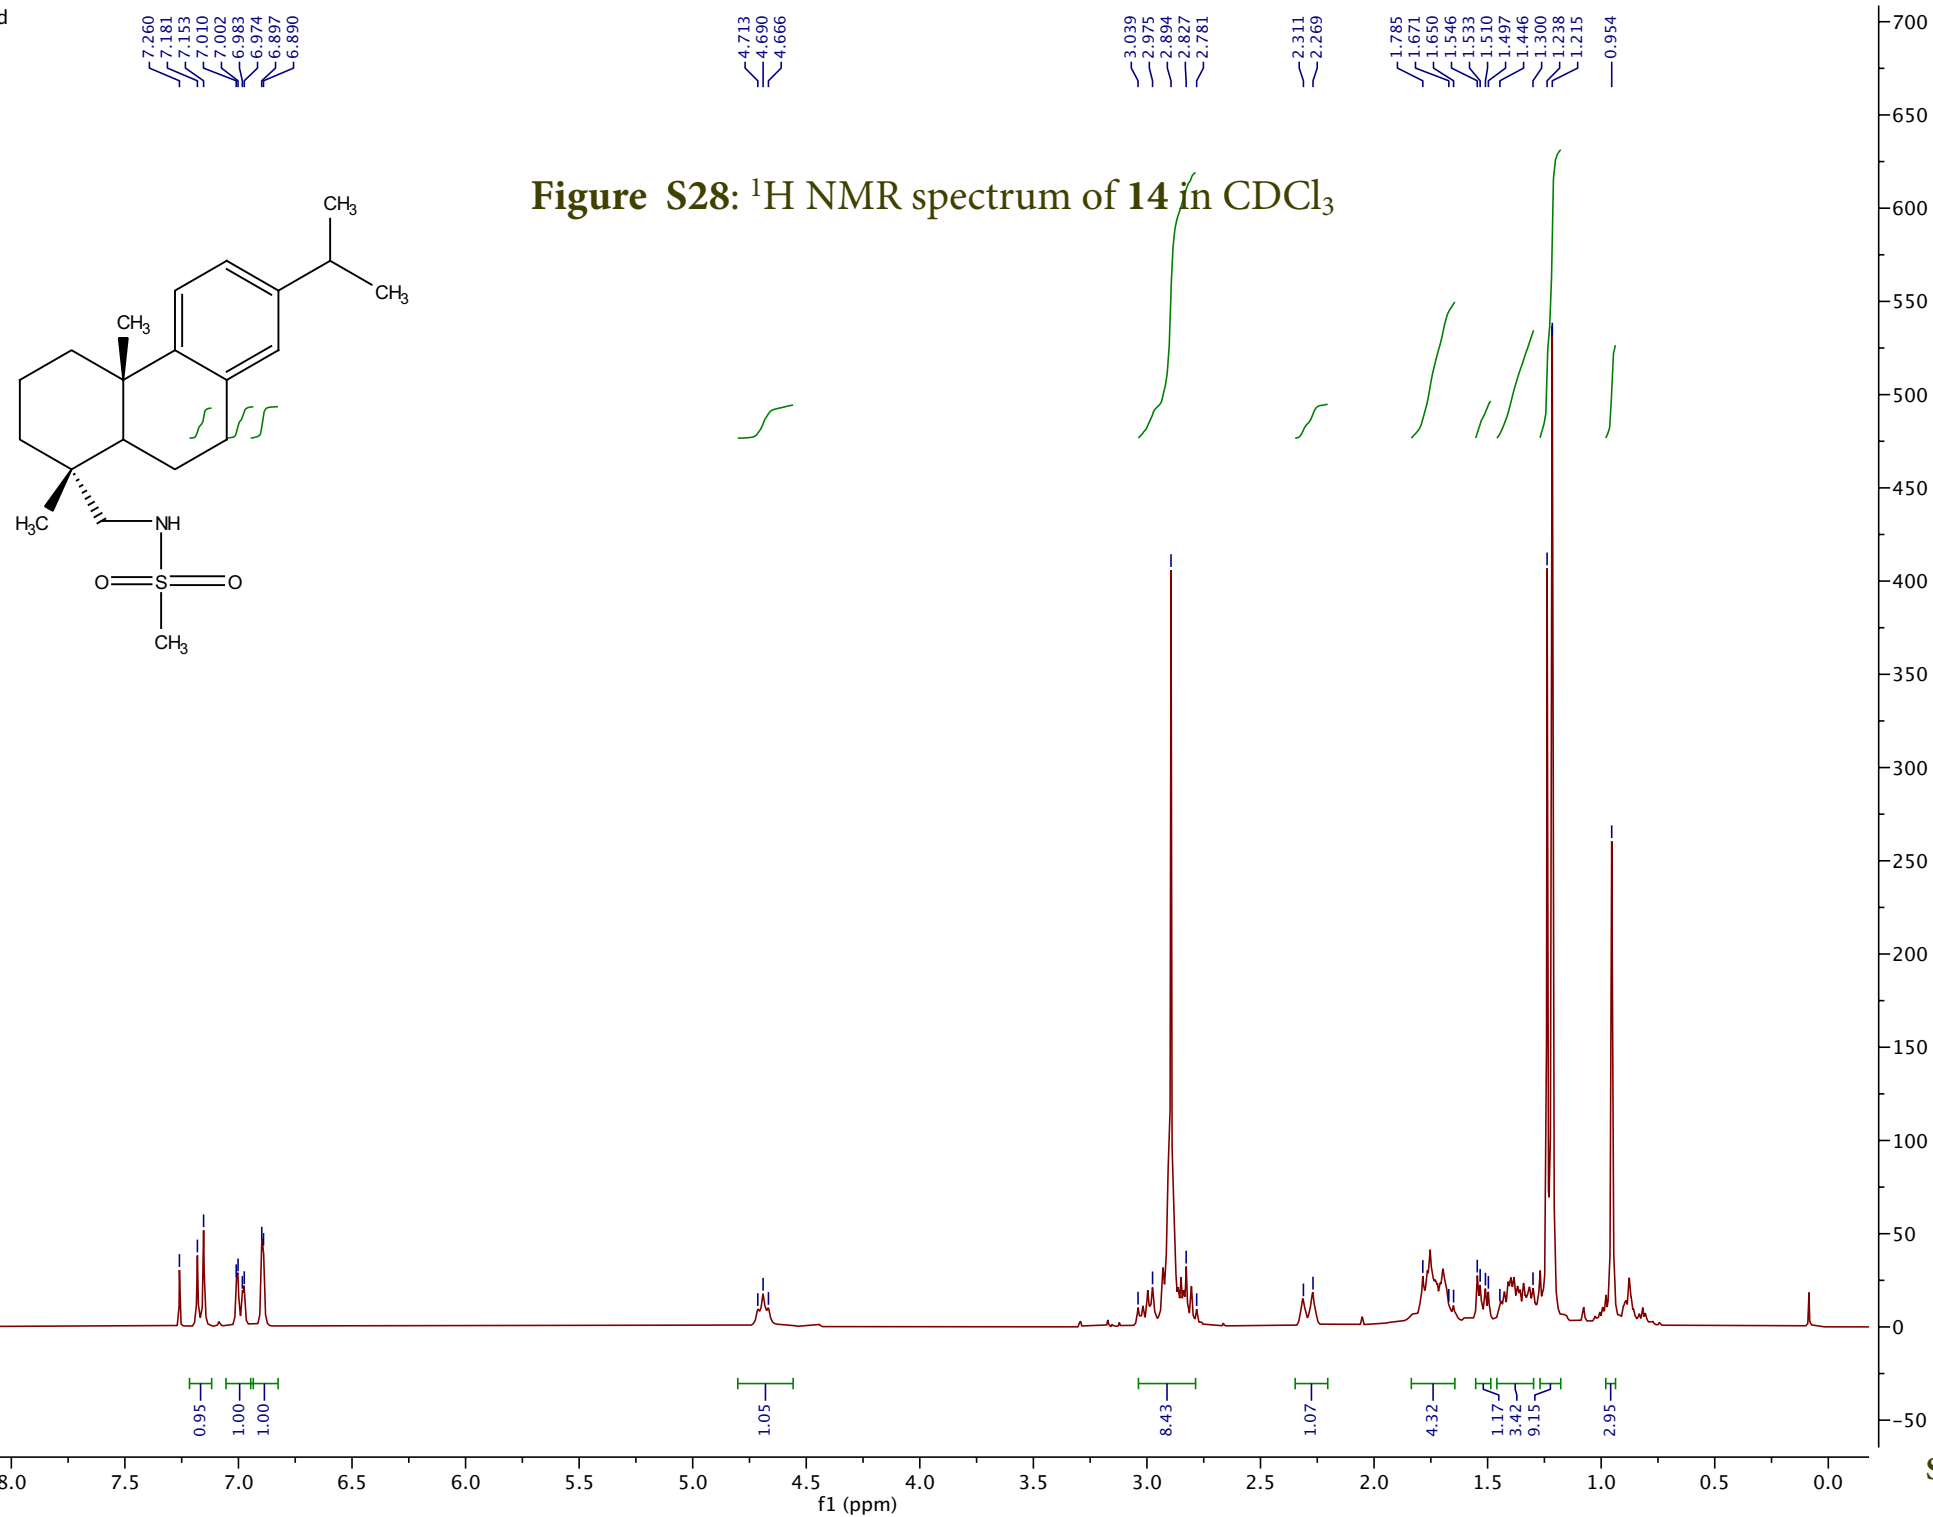

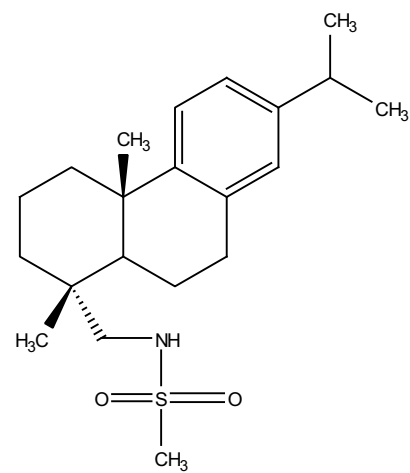

Figure S29: <sup>13</sup>C NMR spectrum of 14 in CDCl<sub>3</sub>

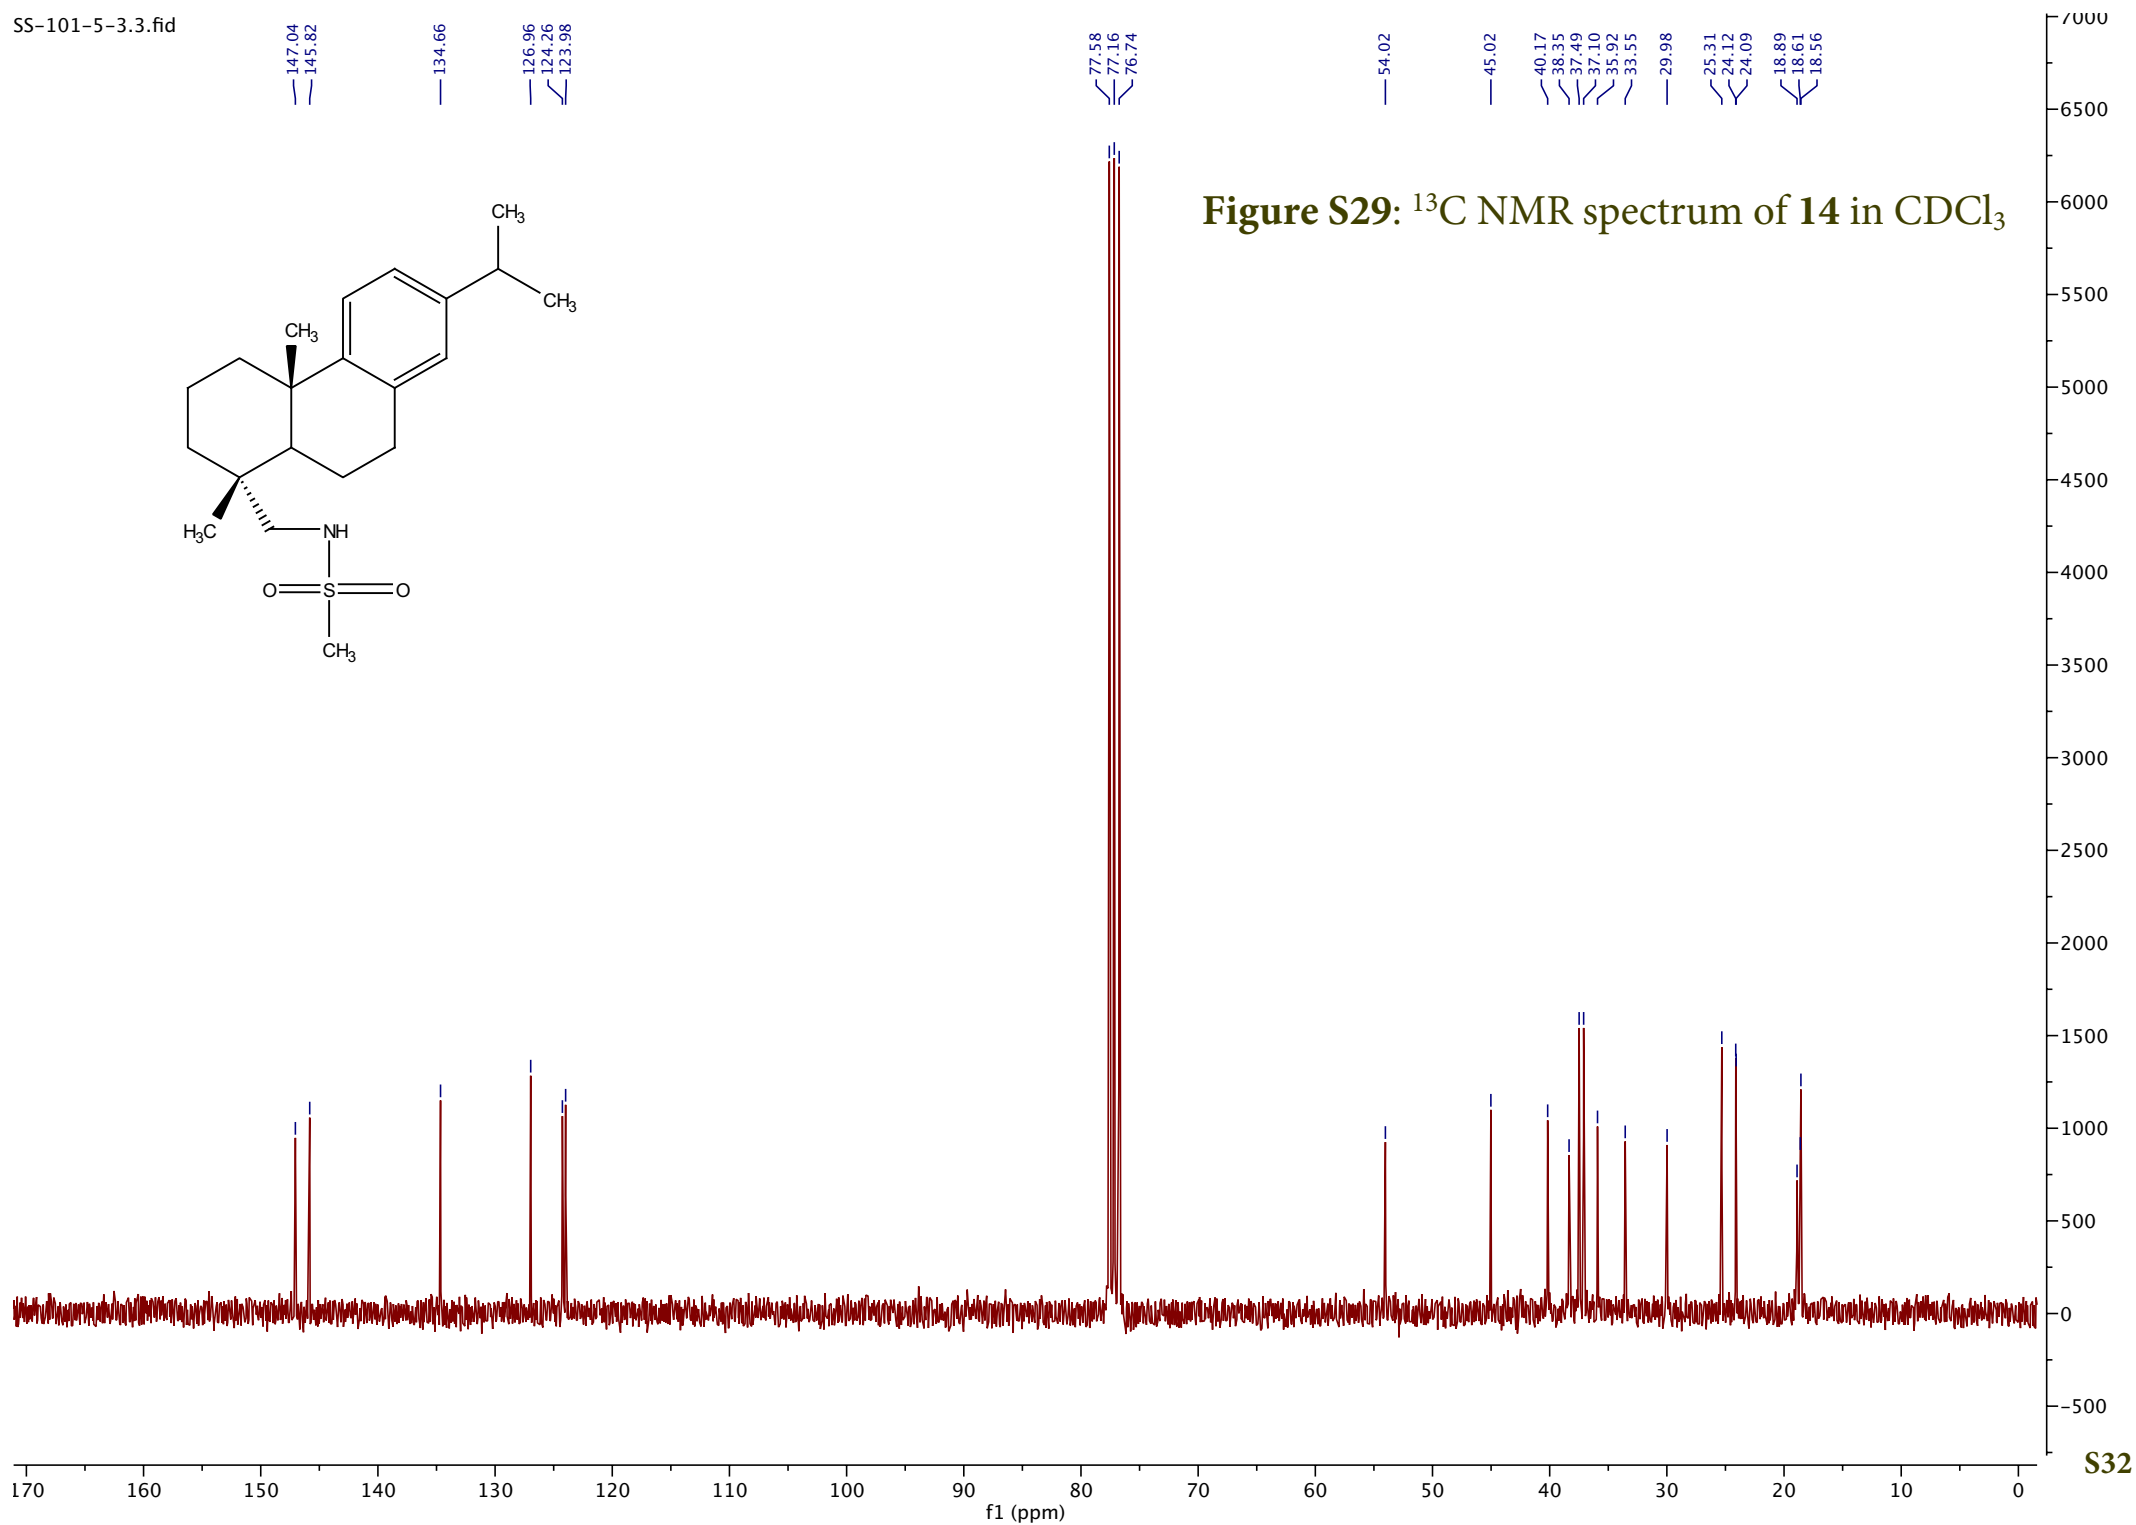



Figure S30: High resolution mass spectrum of 14

| Sample Name | Mol Fomula | MW       | M+H      | observed | delta   | ppm   |
|-------------|------------|----------|----------|----------|---------|-------|
| SS-101-5-3  | C21H33NO2S | 363.2232 | 364.2310 | 364.2303 | -0.0007 | -1.92 |

SS-101-5-3 #2022-3892 RT: 10.74-20.54 AV: 1871 NL: 1.26E6  
T: FTMS + c NSI Full ms [100.0000-1000.0000]

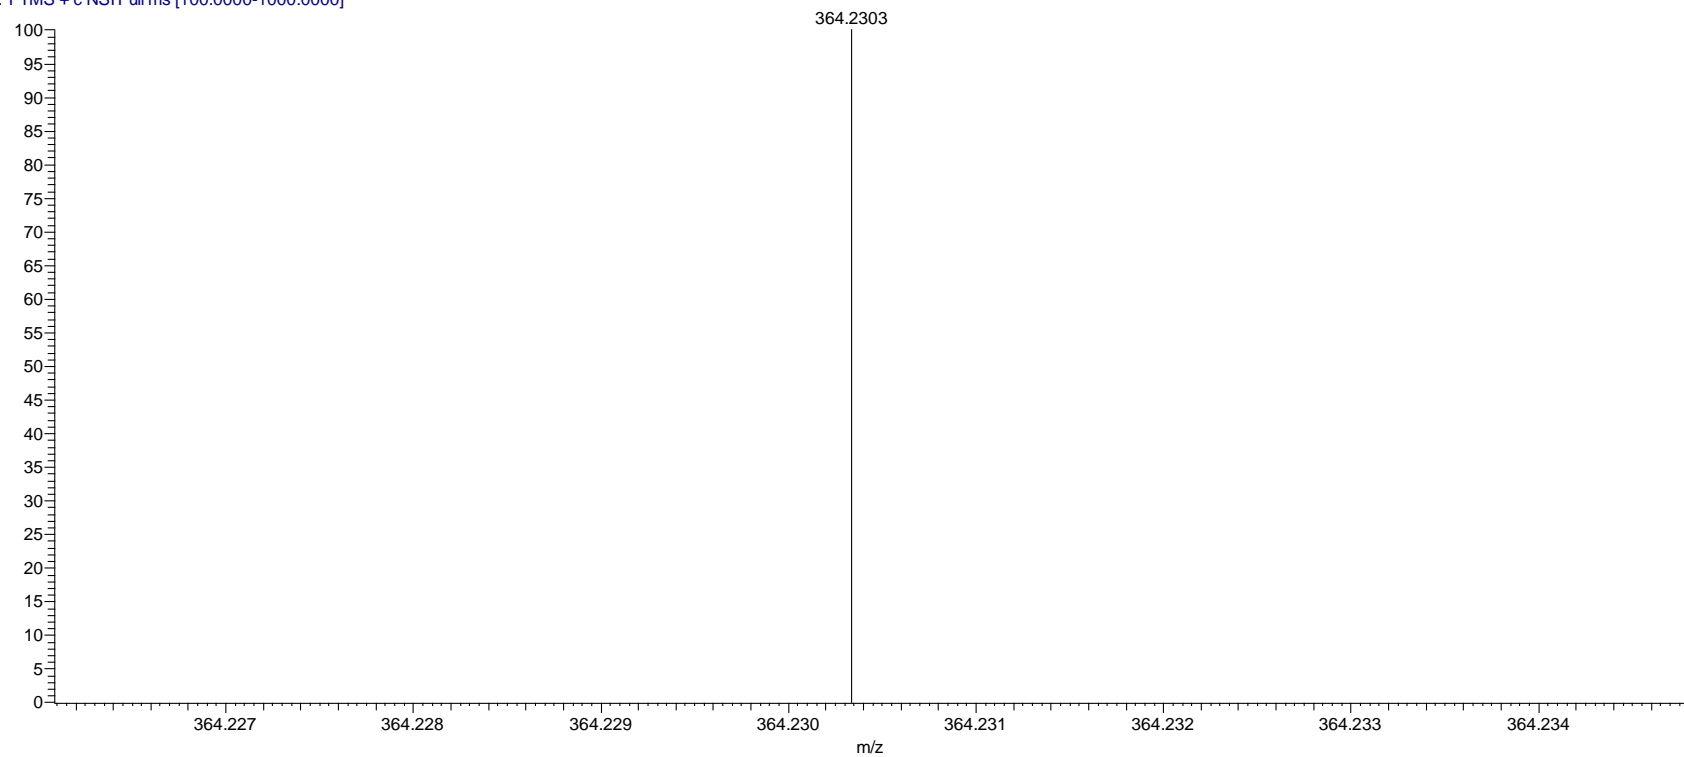

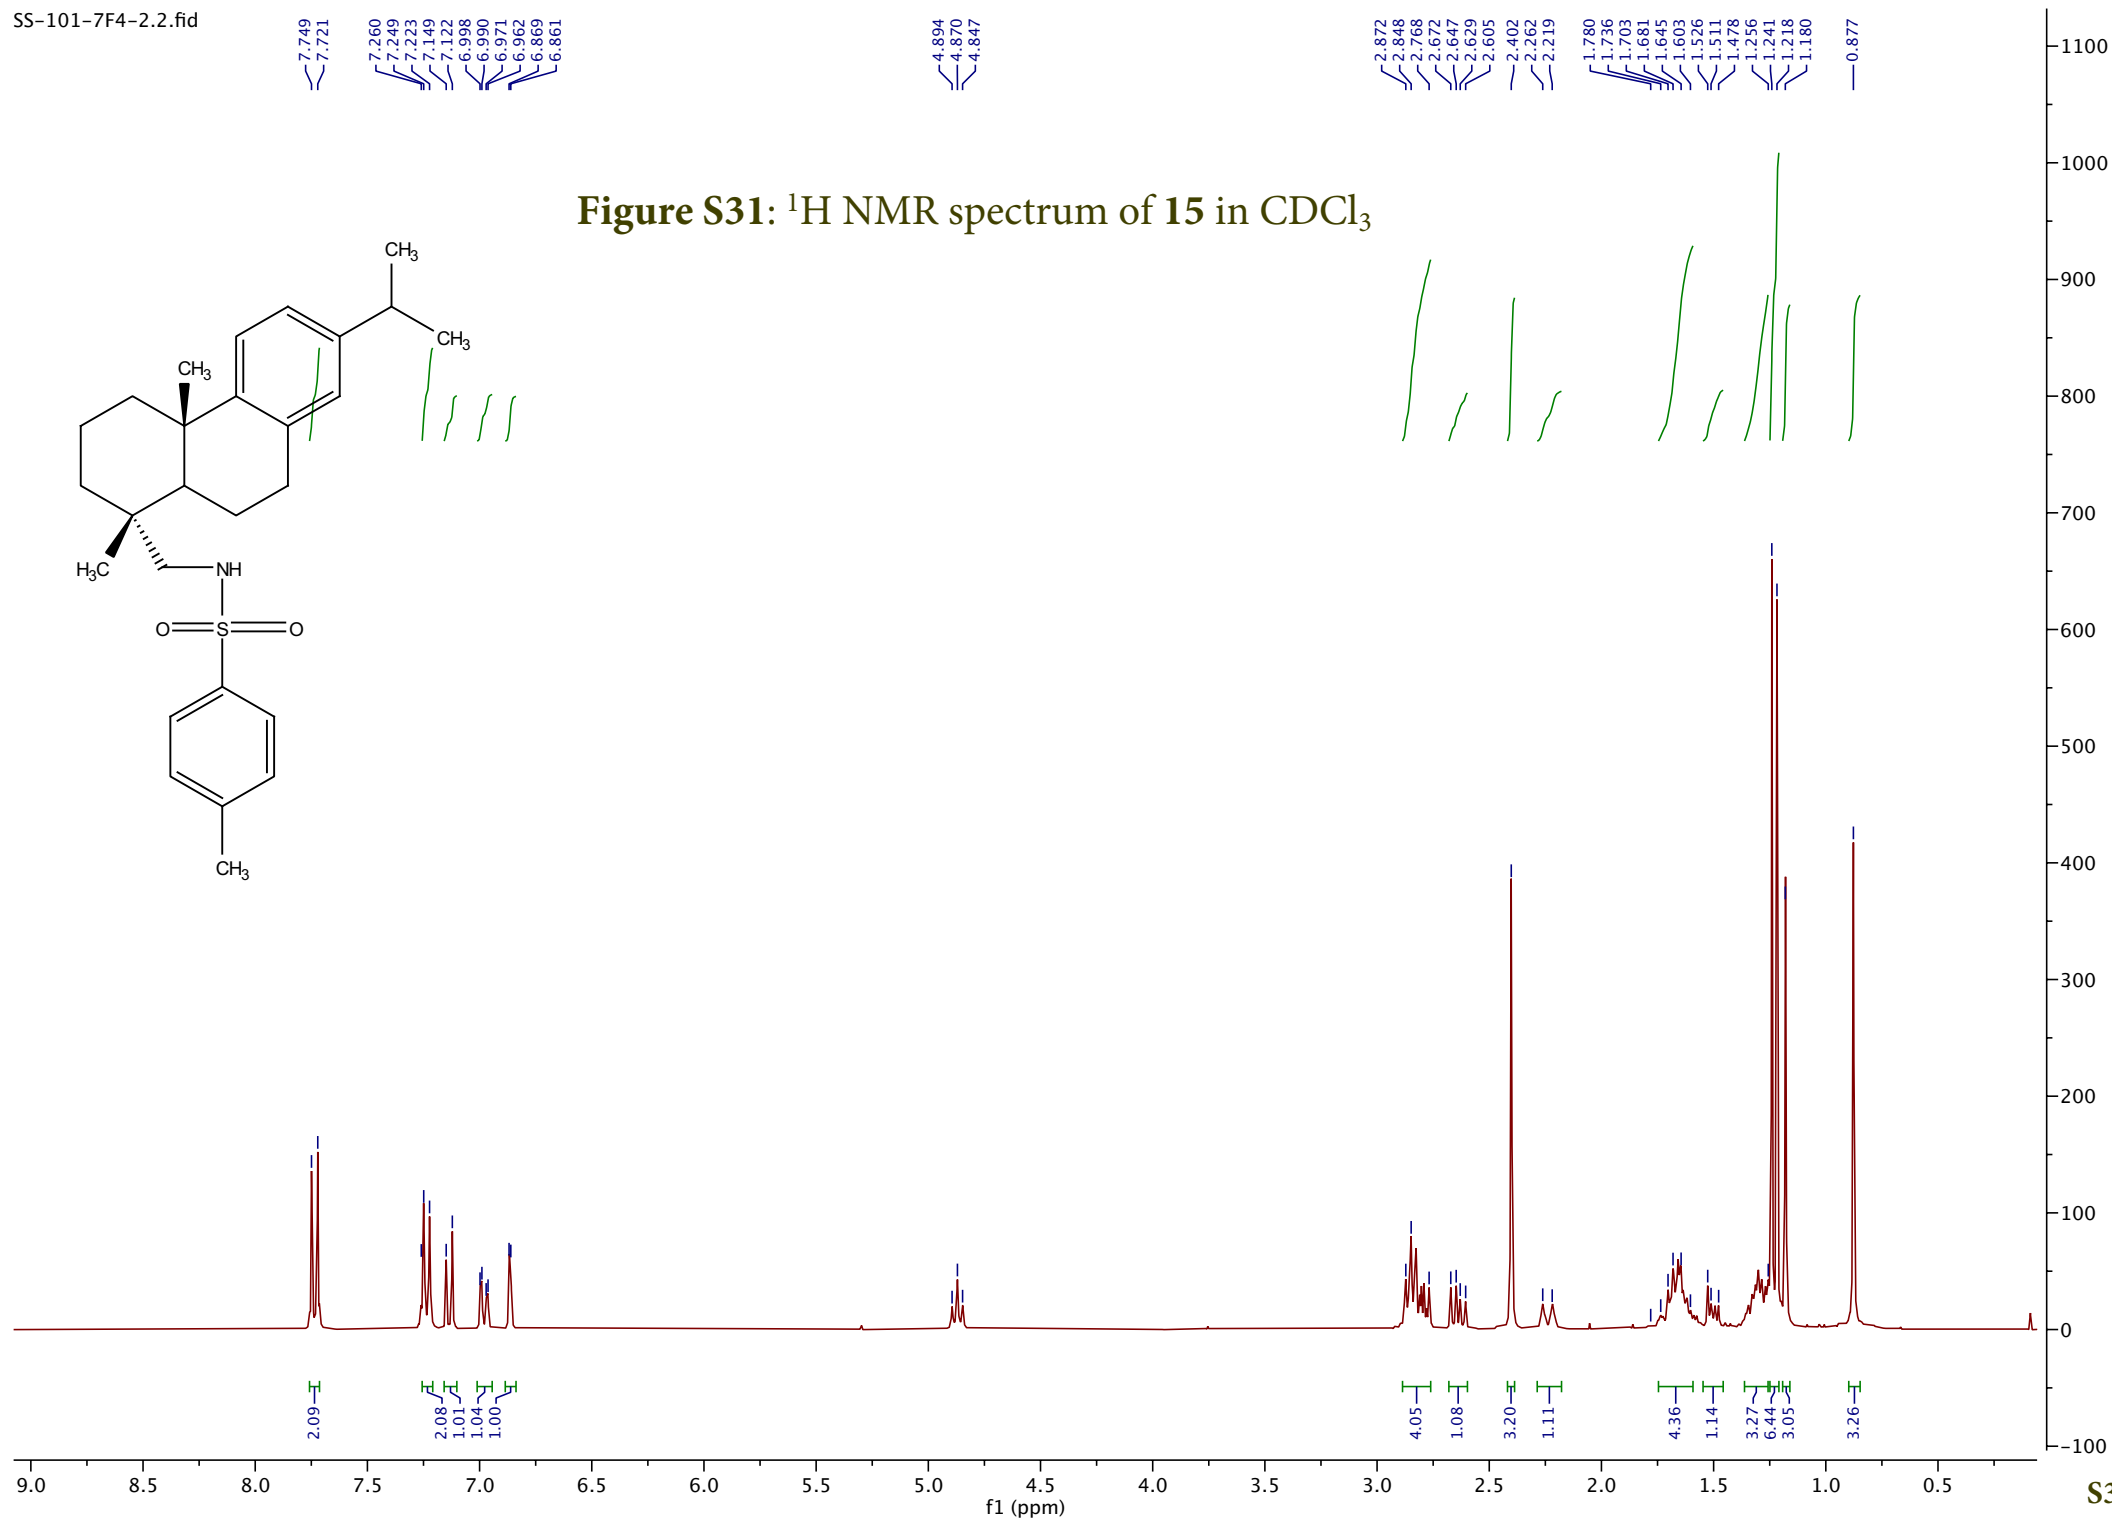

147.07  
145.66  
143.33  
137.19  
134.76  
129.81  
127.08  
126.93  
124.22  
123.88

77.58  
77.16  
76.74

53.89

44.92

38.29  
37.47  
37.04  
35.83  
33.55

29.95

25.31  
24.15  
21.61  
18.80  
18.66  
18.60

**Figure S32:**  $^{13}\text{C}$  NMR spectrum of **15** in  $\text{CDCl}_3$

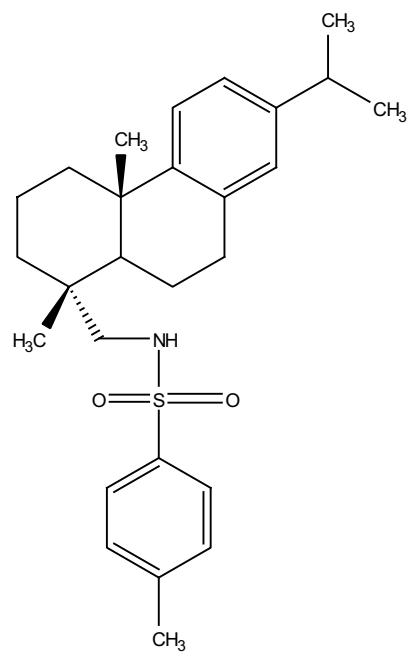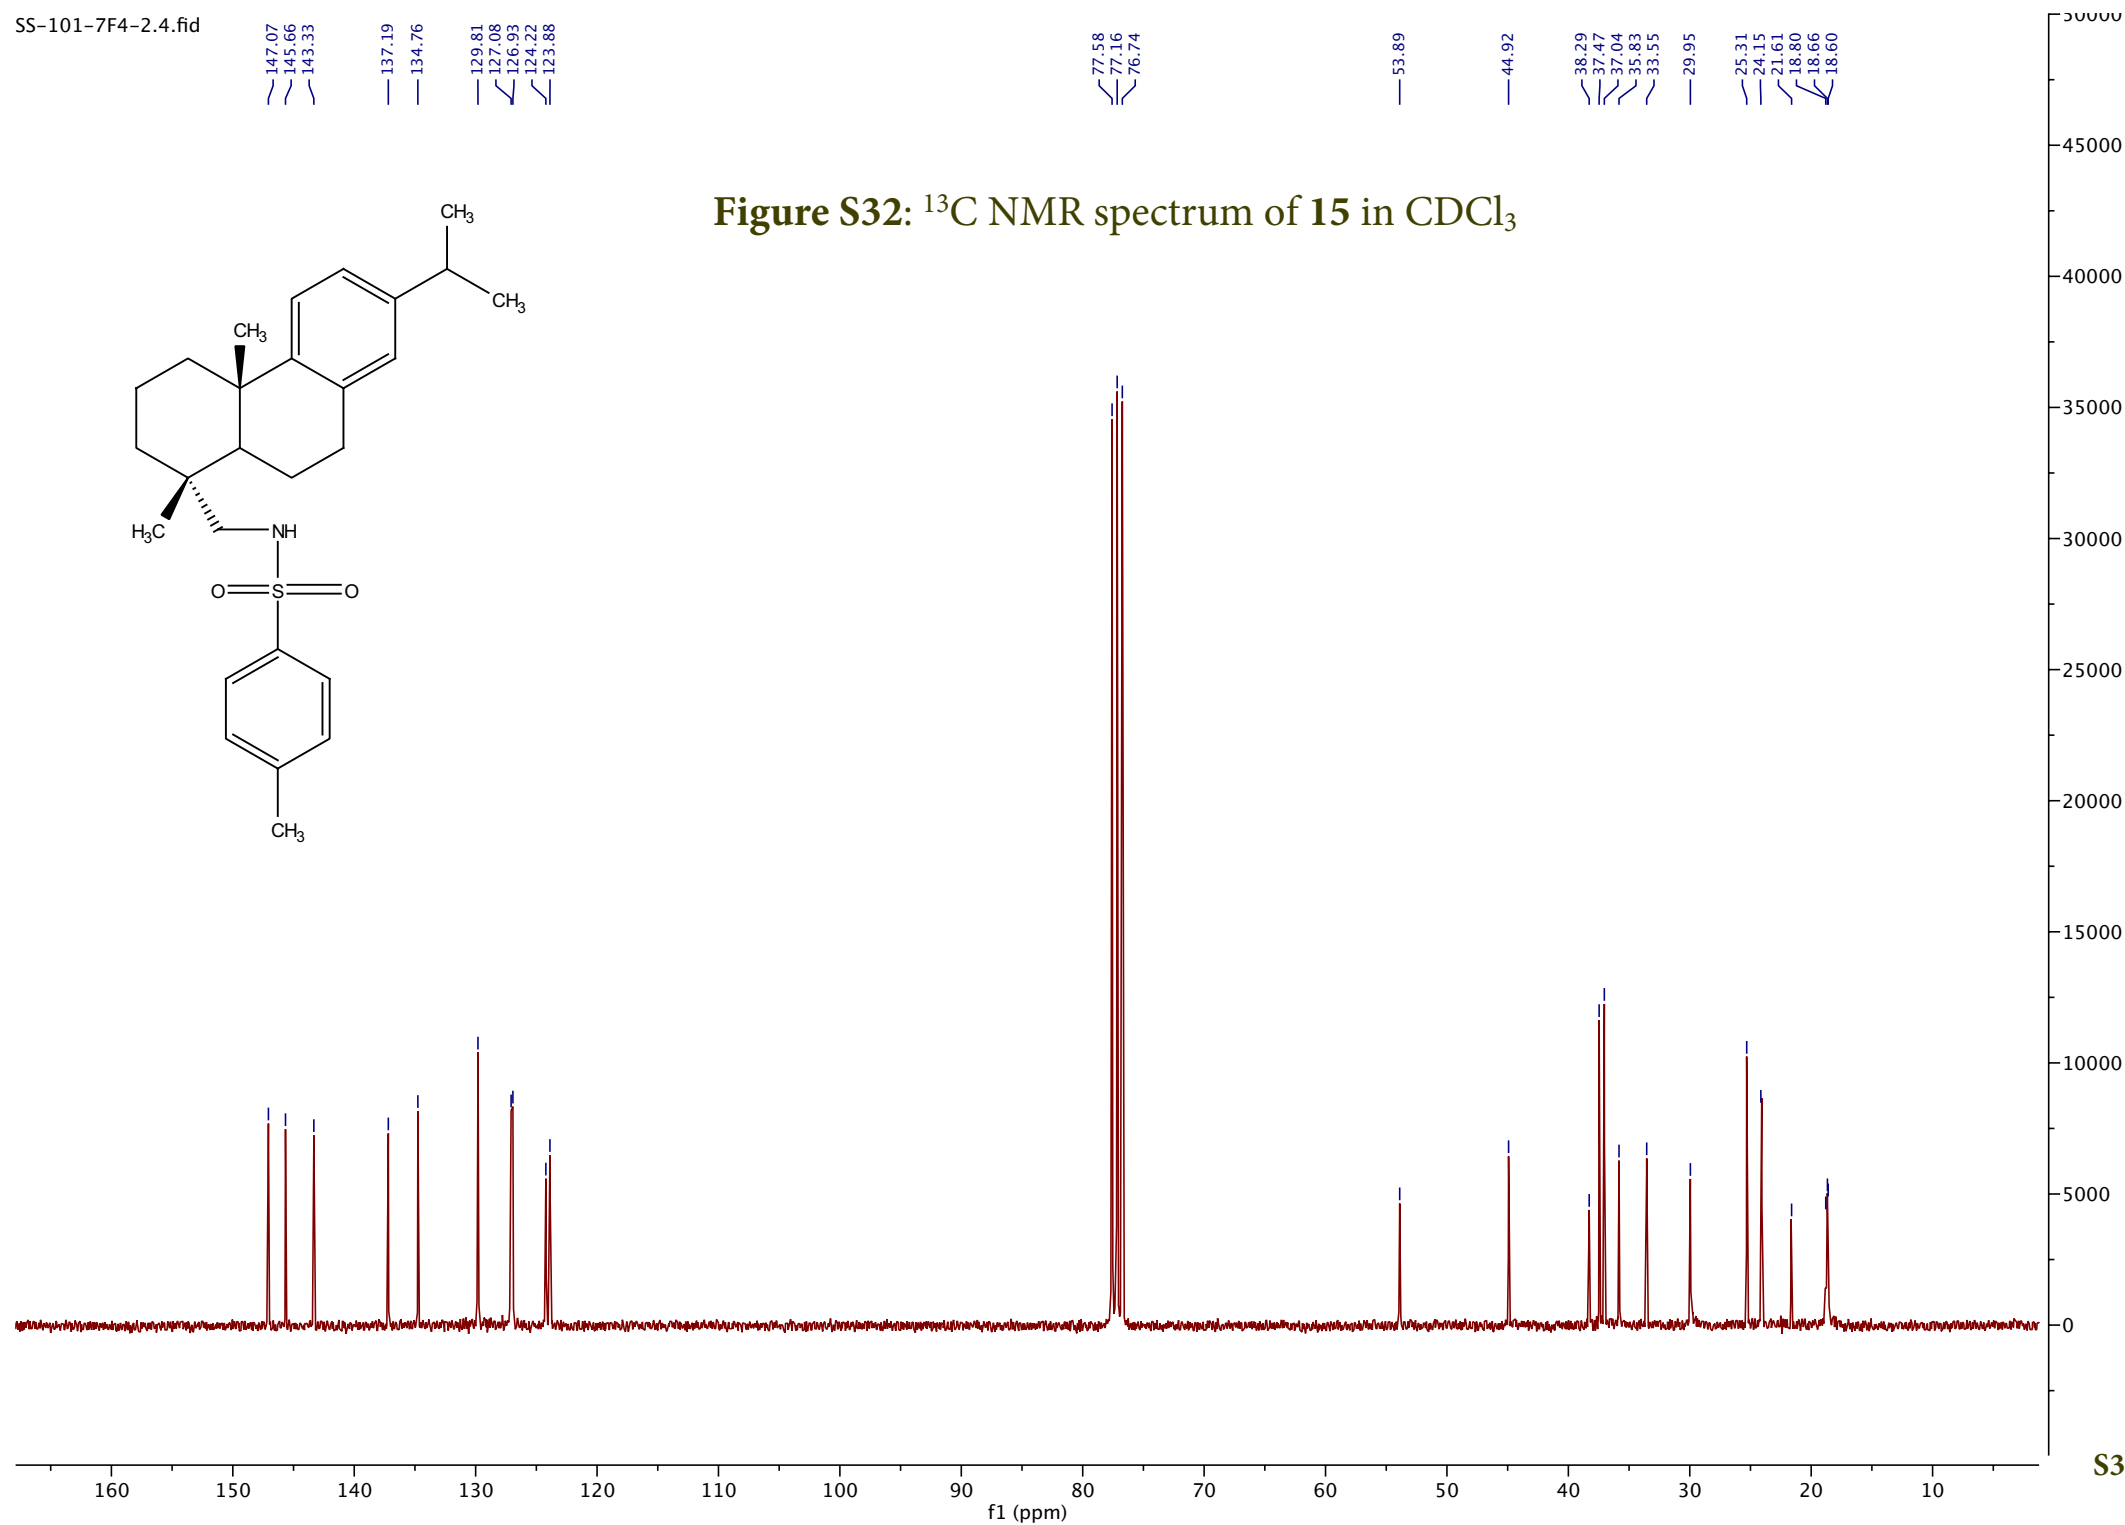

**Figure S33:** High resolution mass spectrum of **15**

| Sample Name | Mol Fomula | MW       | M+H      | observed | delta   | ppm   |
|-------------|------------|----------|----------|----------|---------|-------|
| SS-101-7-4  | C27H37NO2S | 439.2545 | 440.2623 | 440.2616 | -0.0007 | -1.59 |

SS-101-7-4- #3988-4051 RT: 21.22-21.58 AV: 64 NL: 2.04E7  
T: FTMS + c NSI Full ms [100.0000-1000.0000]

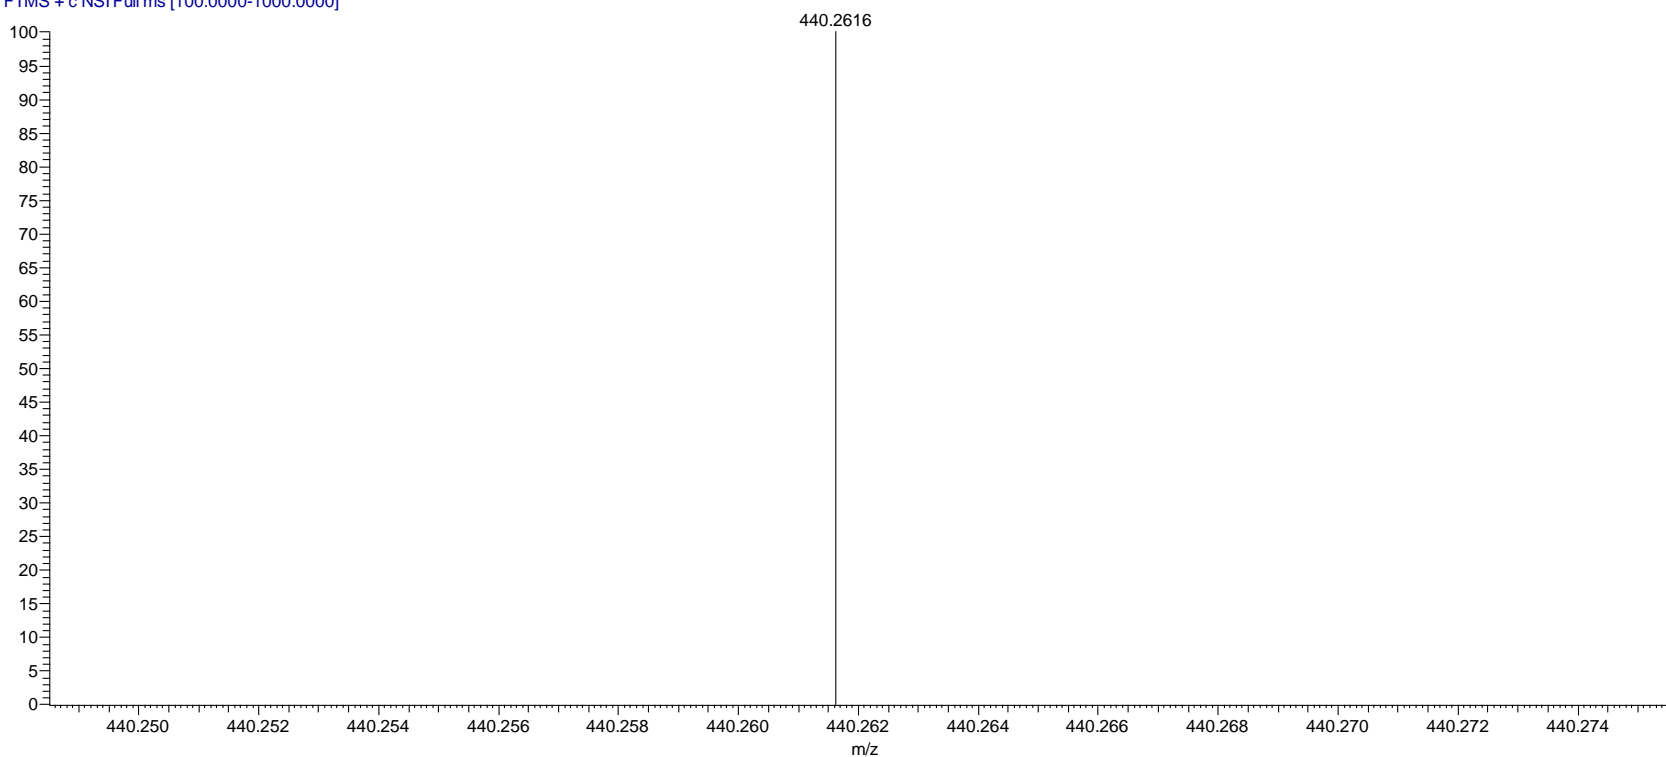

7.399  
7.378  
7.339  
7.291  
7.268  
7.260  
7.182  
7.155  
6.984  
6.982  
6.965  
6.957  
6.884  
6.876

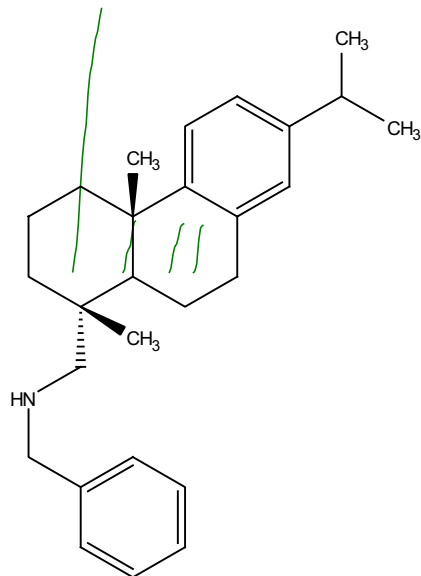

**Figure S34:**  $^1\text{H}$  NMR spectrum of **16** in  $\text{CDCl}_3$

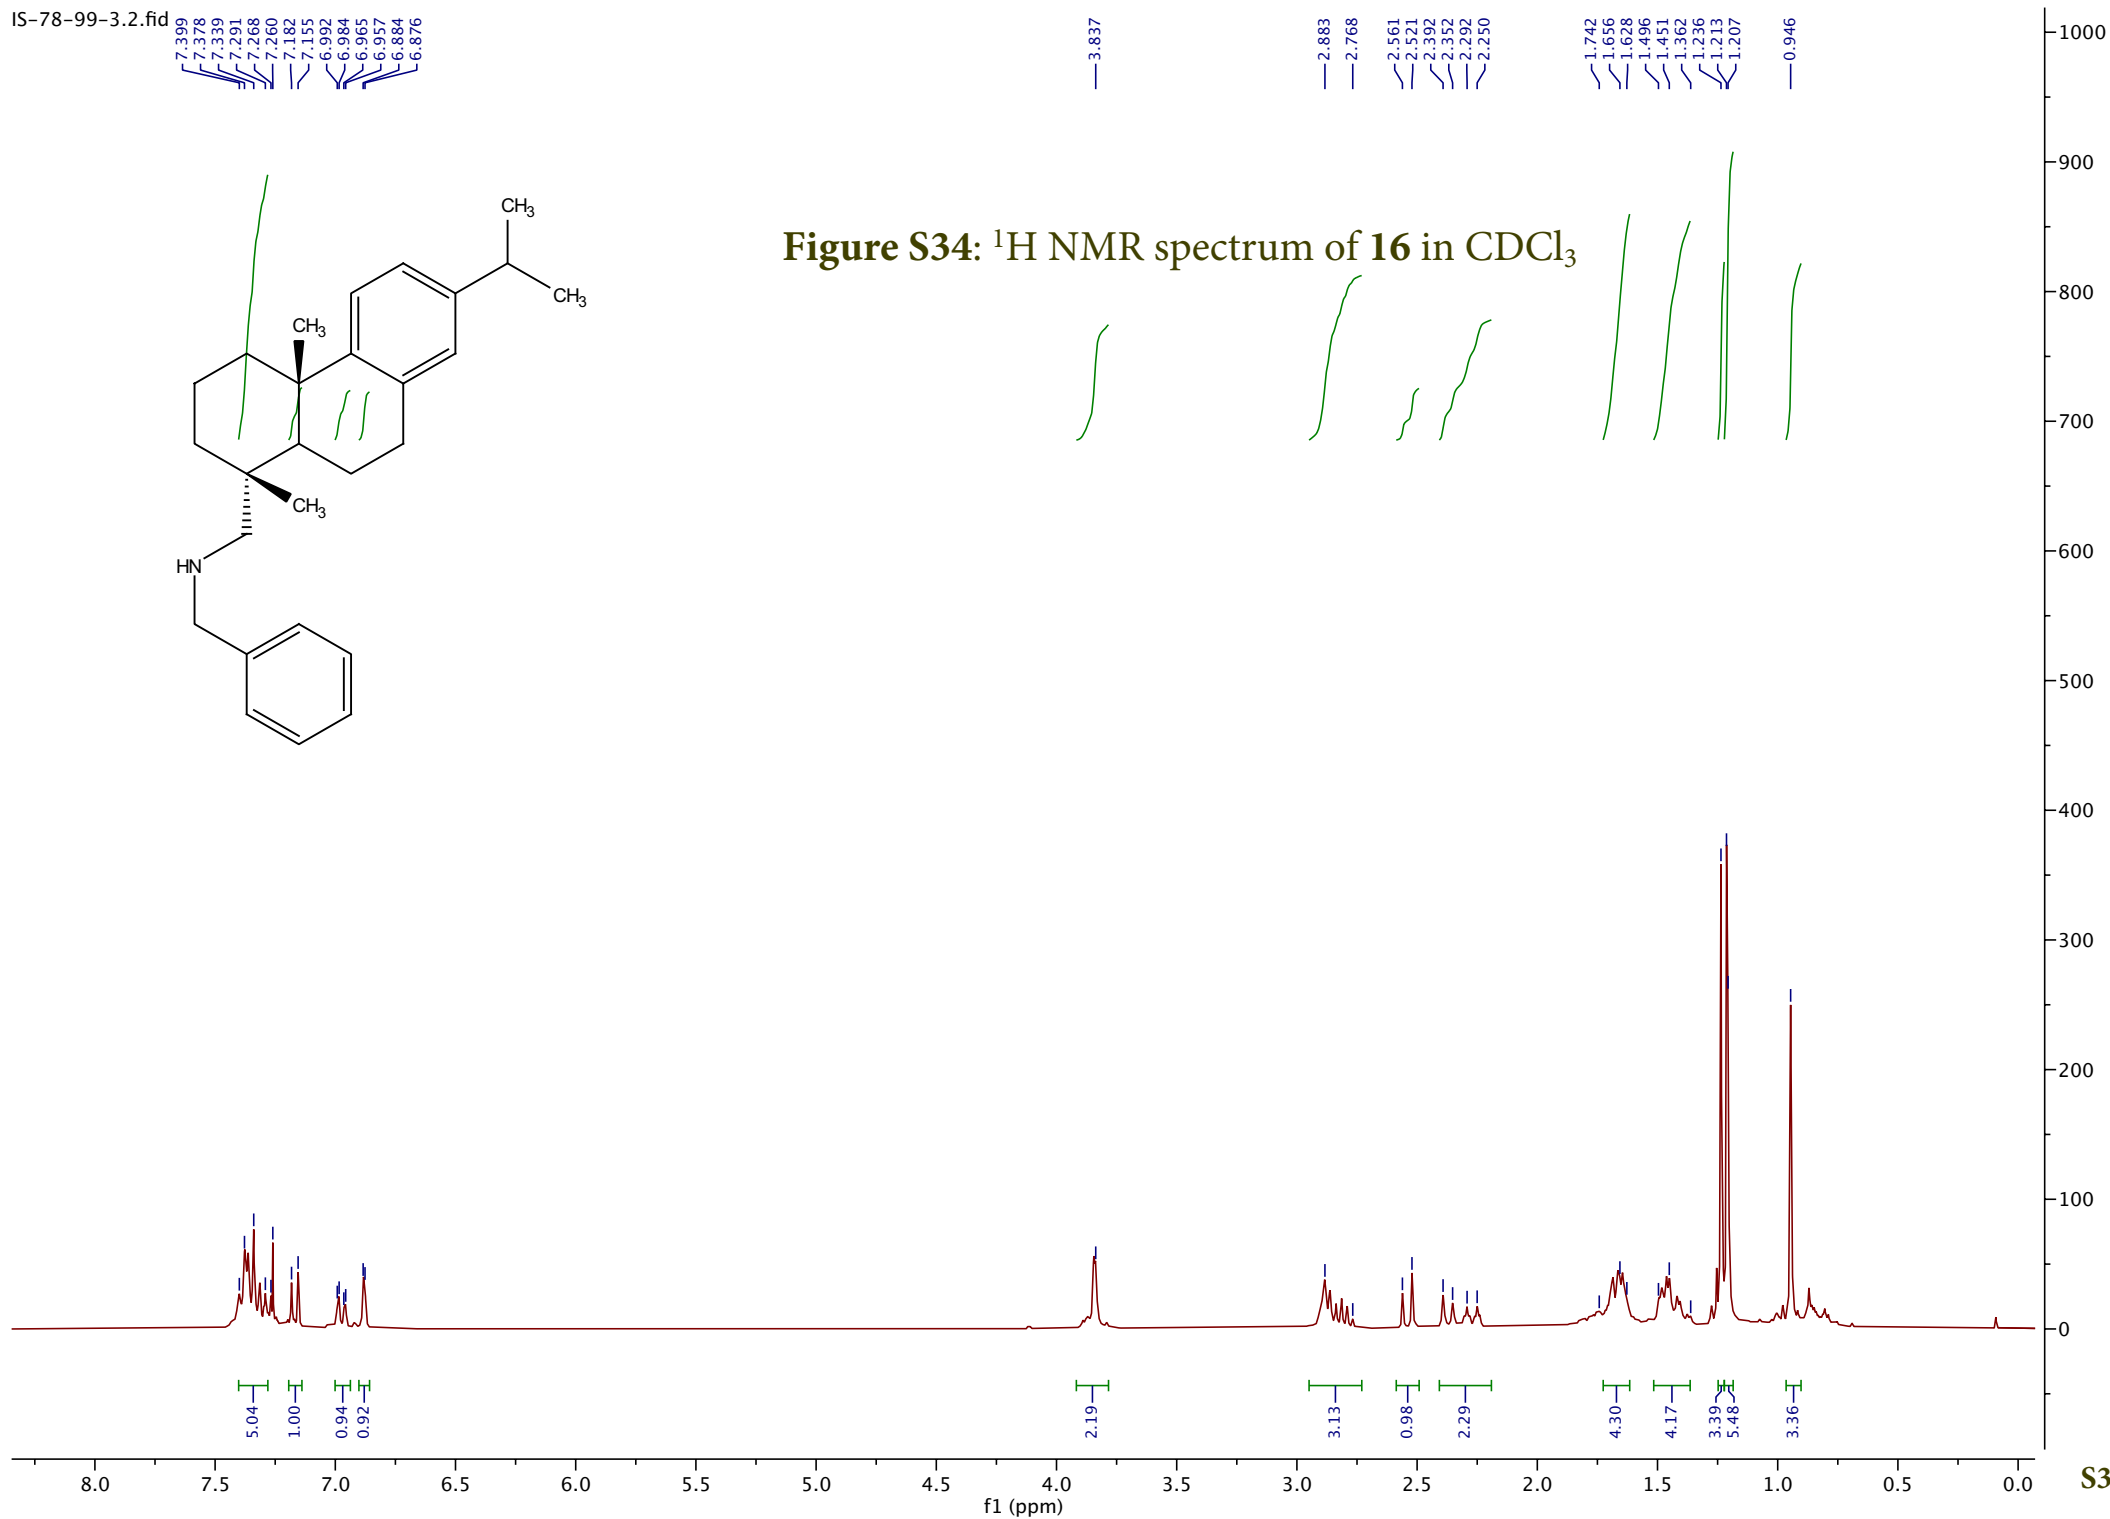

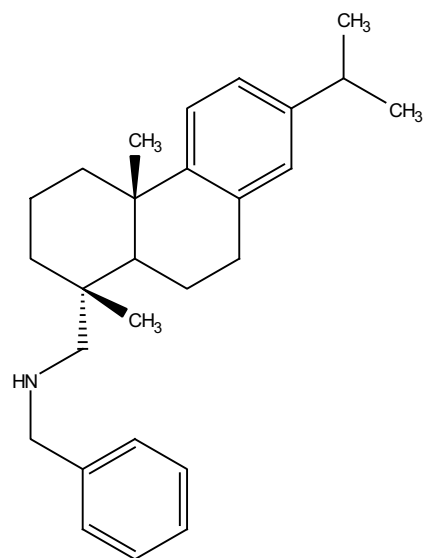147.53  
145.55

134.87

128.52  
127.31  
126.89  
124.34  
123.9077.58  
77.36  
76.74

60.33

54.26

45.52

38.48  
37.55  
37.06

33.53

30.27

25.49  
24.1119.31  
18.93**Figure S35:**  $^{13}\text{C}$  NMR spectrum of **16** in  $\text{CDCl}_3$ 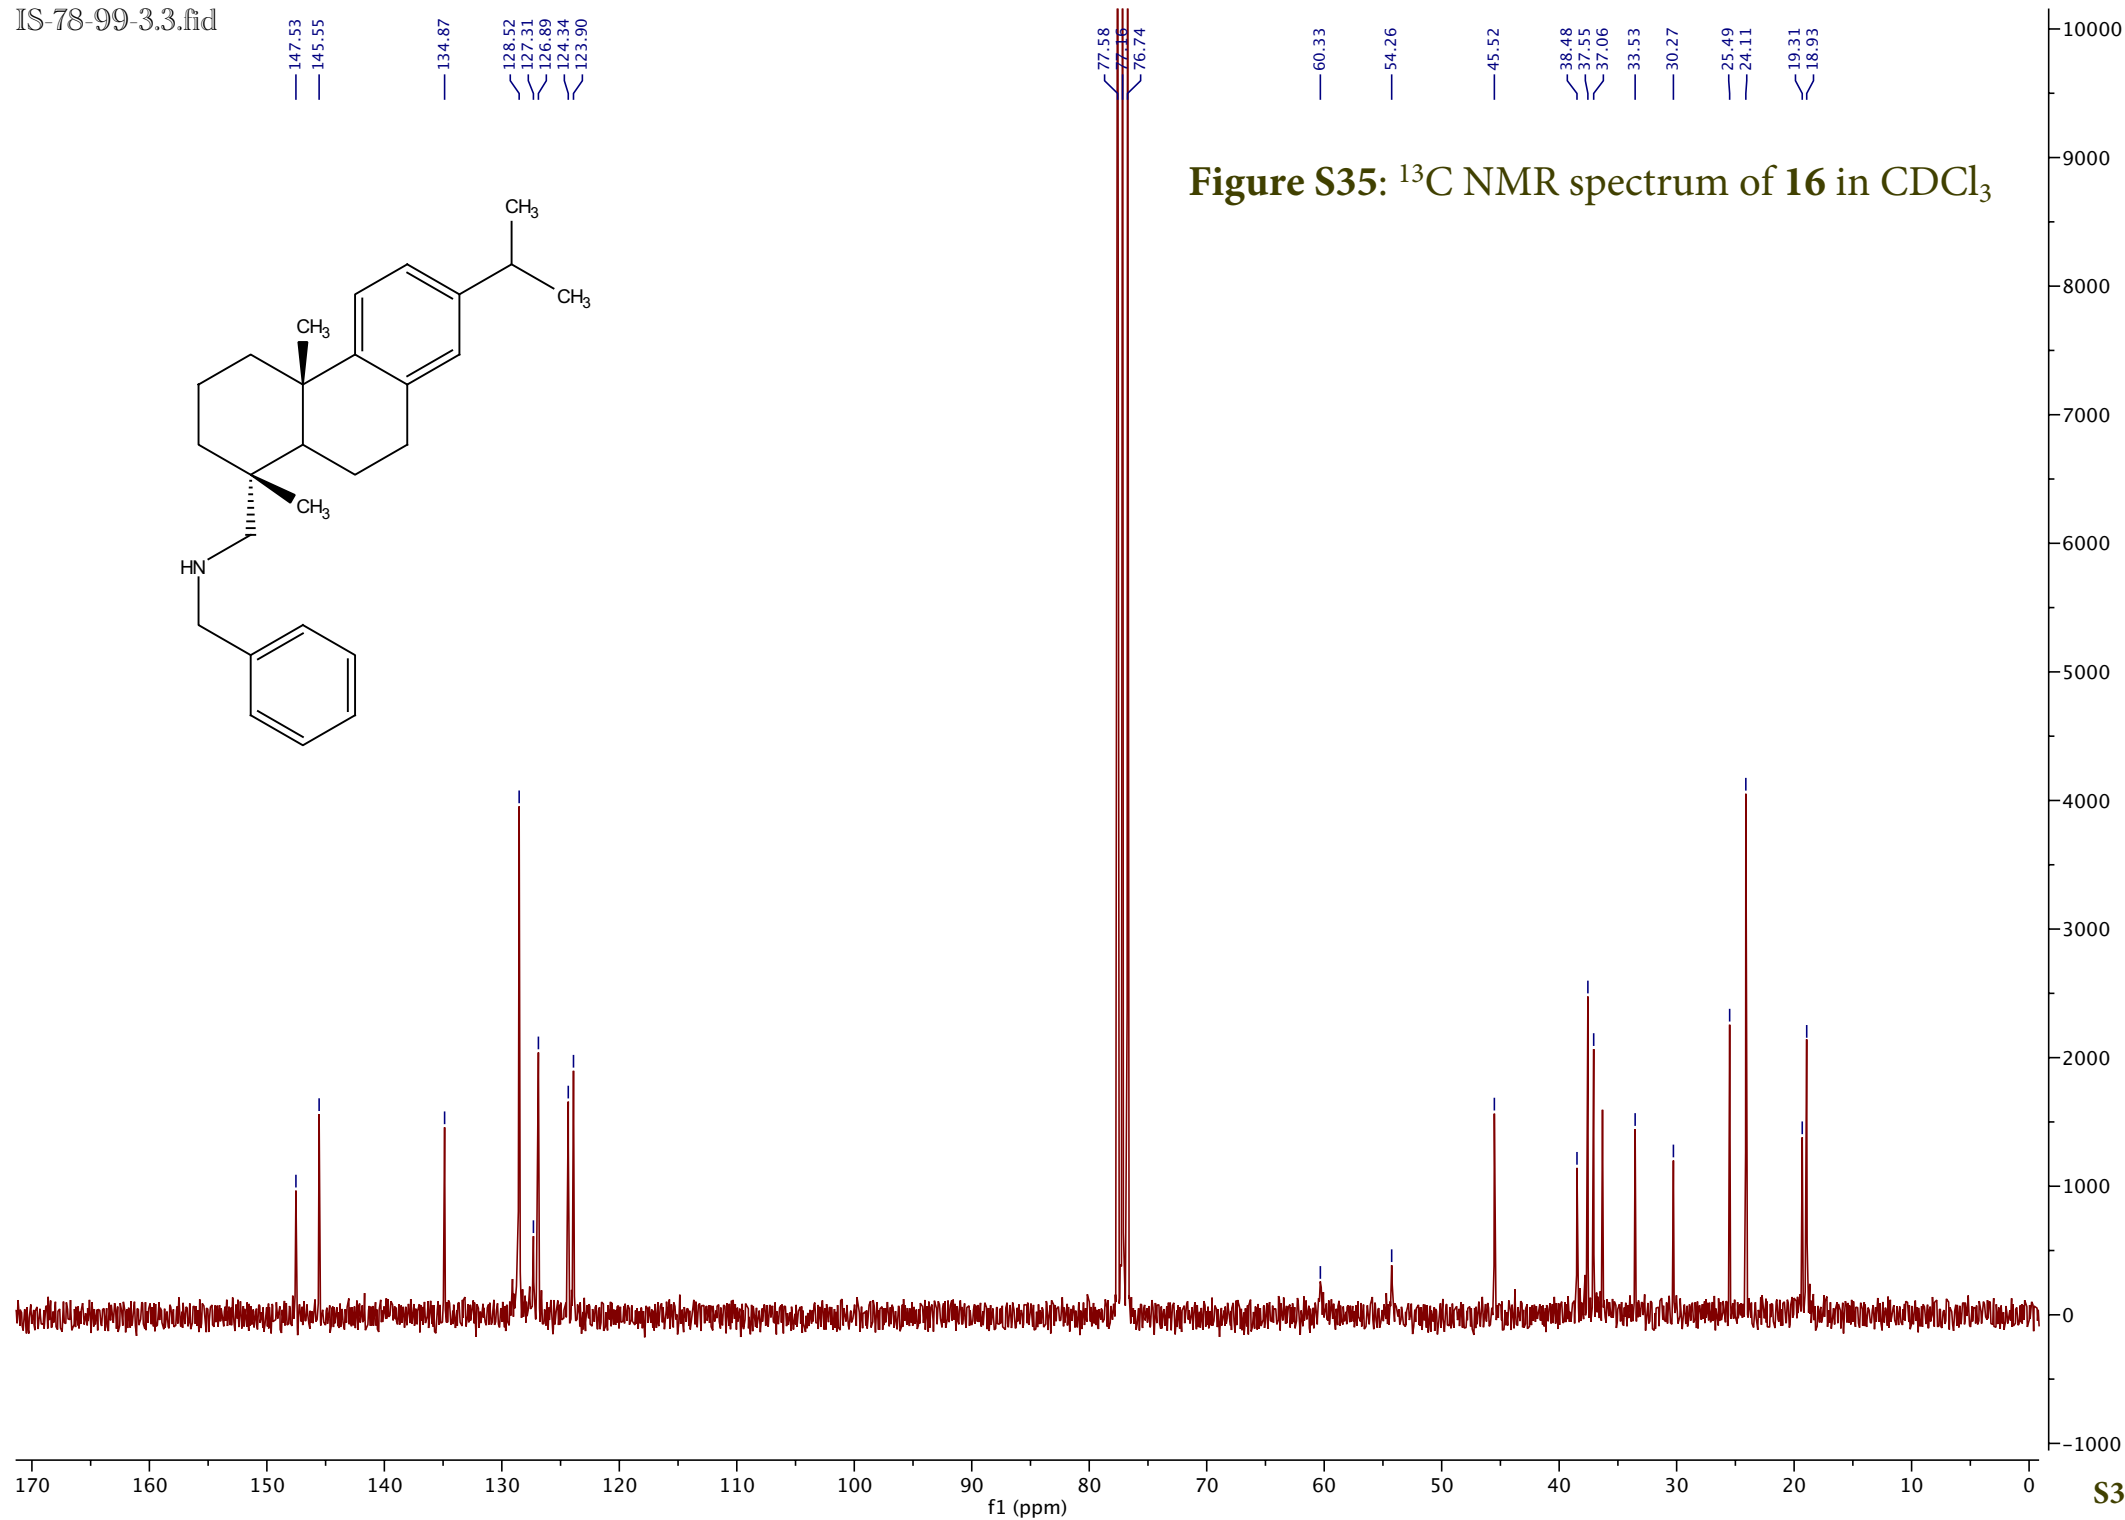

Figure S36: High resolution mass spectrum of 16

| Sample Name | Mol Fomula | MW       | M+H      | observed | delta   | ppm   |
|-------------|------------|----------|----------|----------|---------|-------|
| IS-78-99-3  | C27H37N    | 375.2926 | 376.3004 | 376.3001 | -0.0003 | -0.77 |

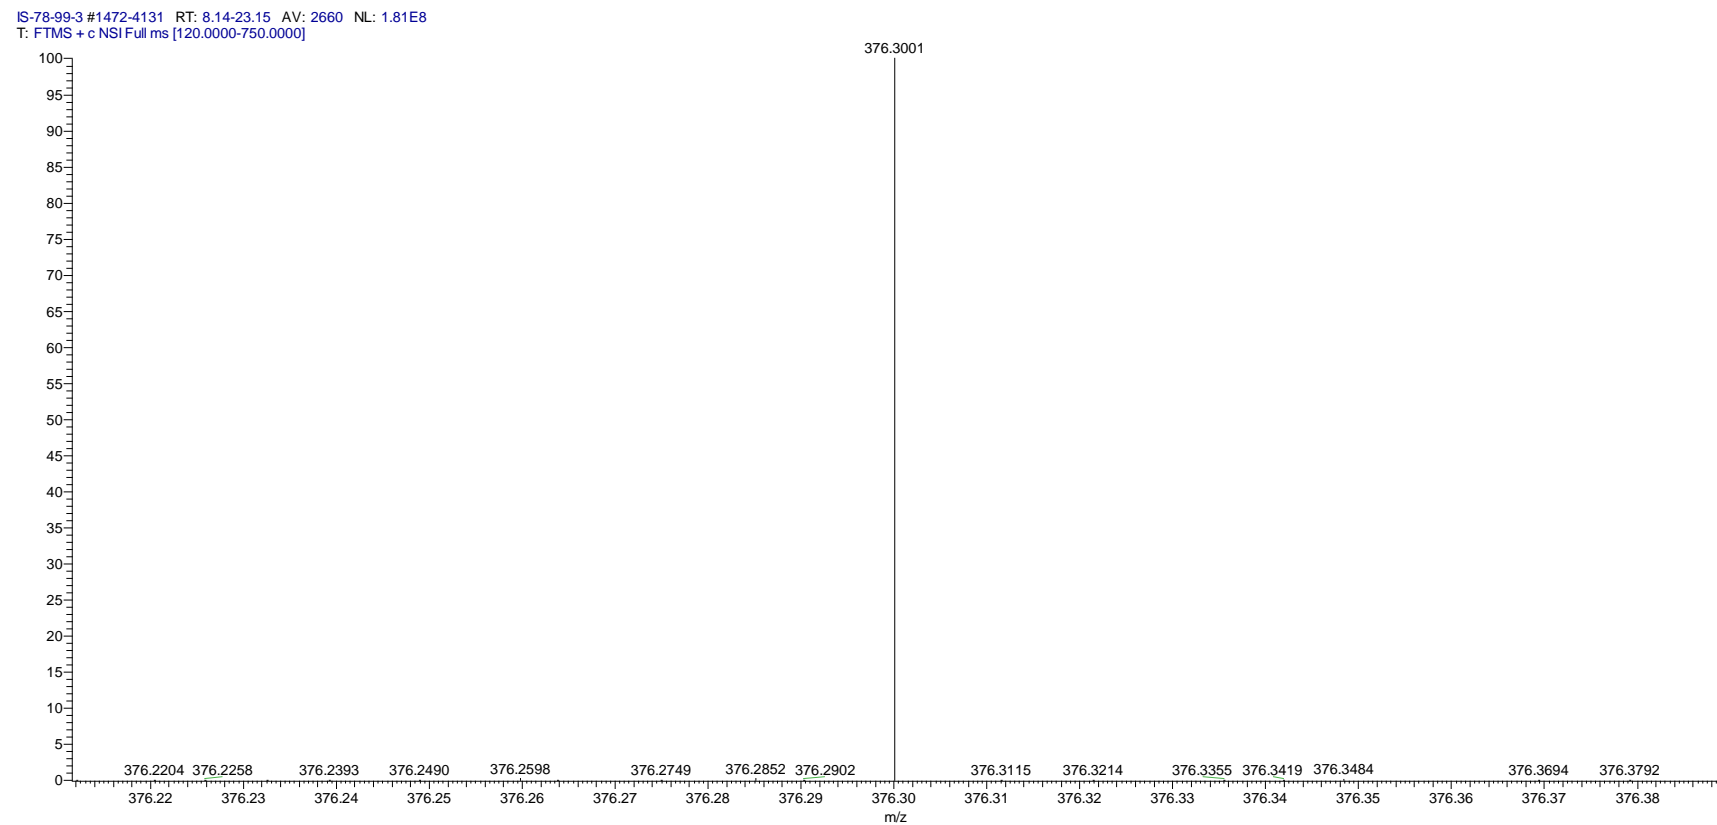

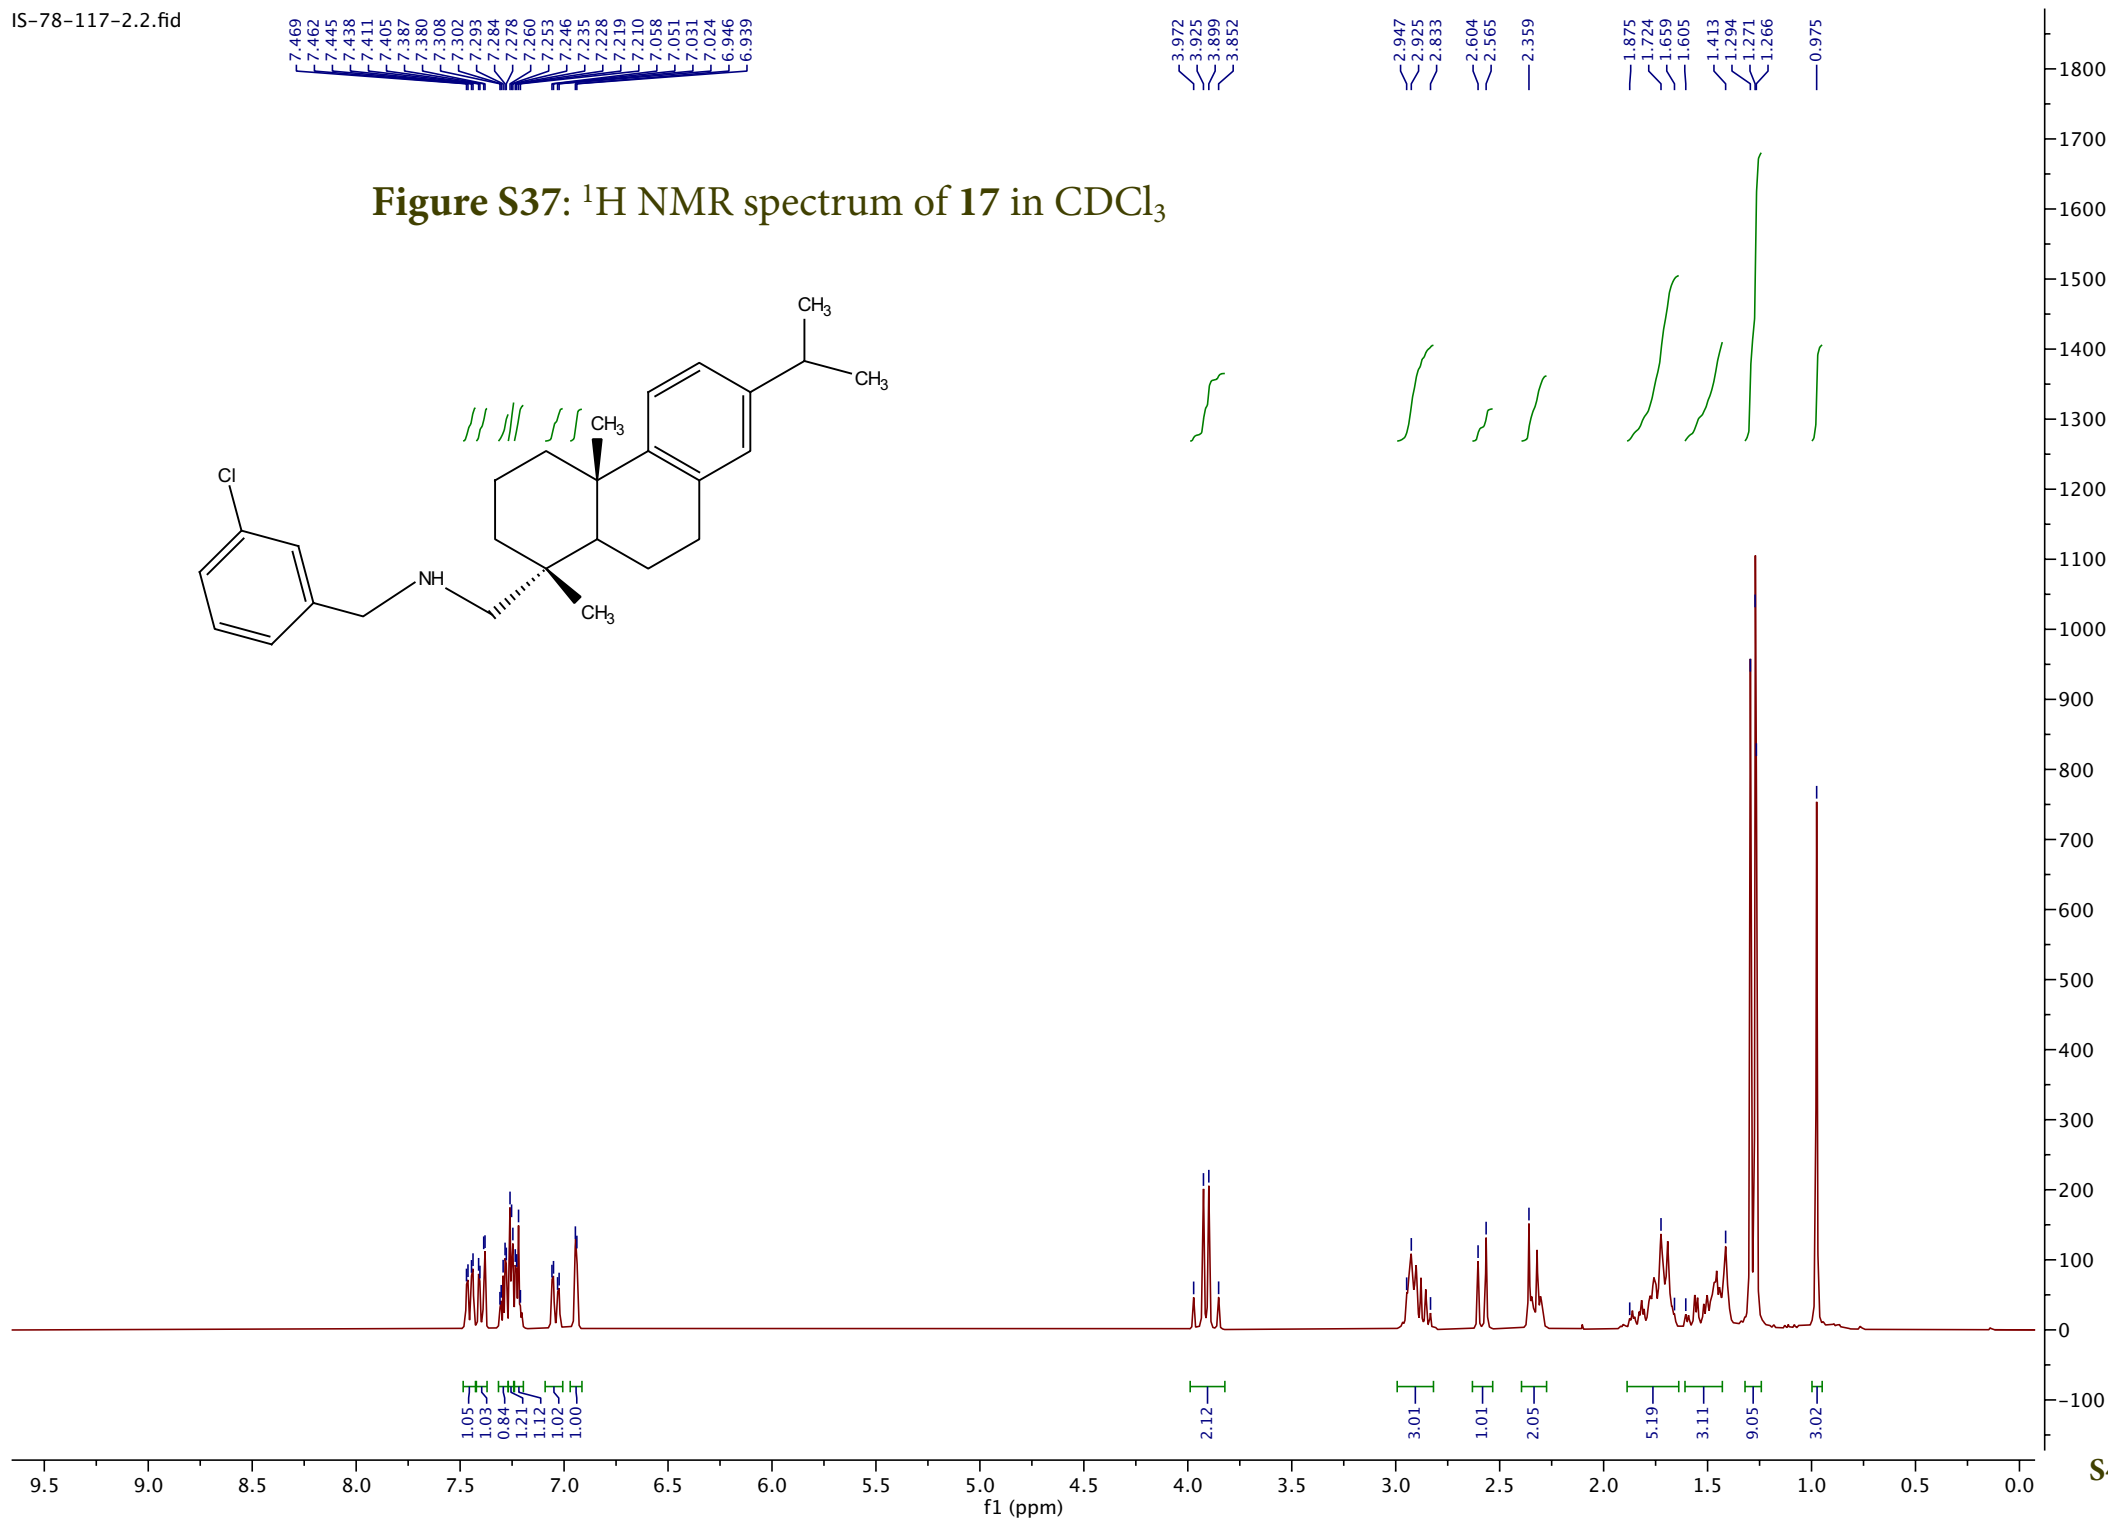



147.67  
145.55138.32  
134.96  
133.76130.15  
129.51  
128.19126.92  
126.79  
124.45  
123.9277.58  
77.16  
76.73

61.02

52.30

45.34

38.66  
37.58  
37.1936.33  
33.57  
30.4325.54  
24.1319.56  
19.03  
18.88**Figure S38:**  $^{13}\text{C}$  NMR spectrum of **17** in  $\text{CDCl}_3$ 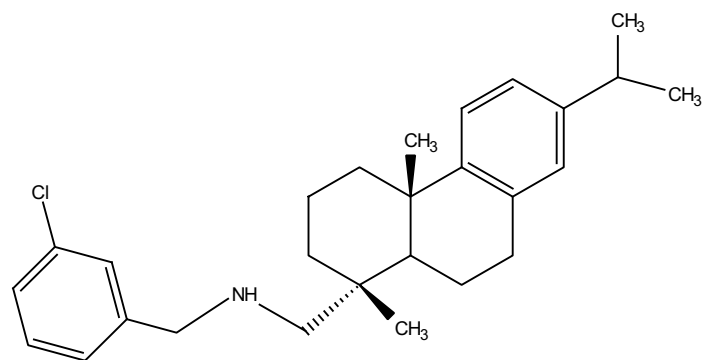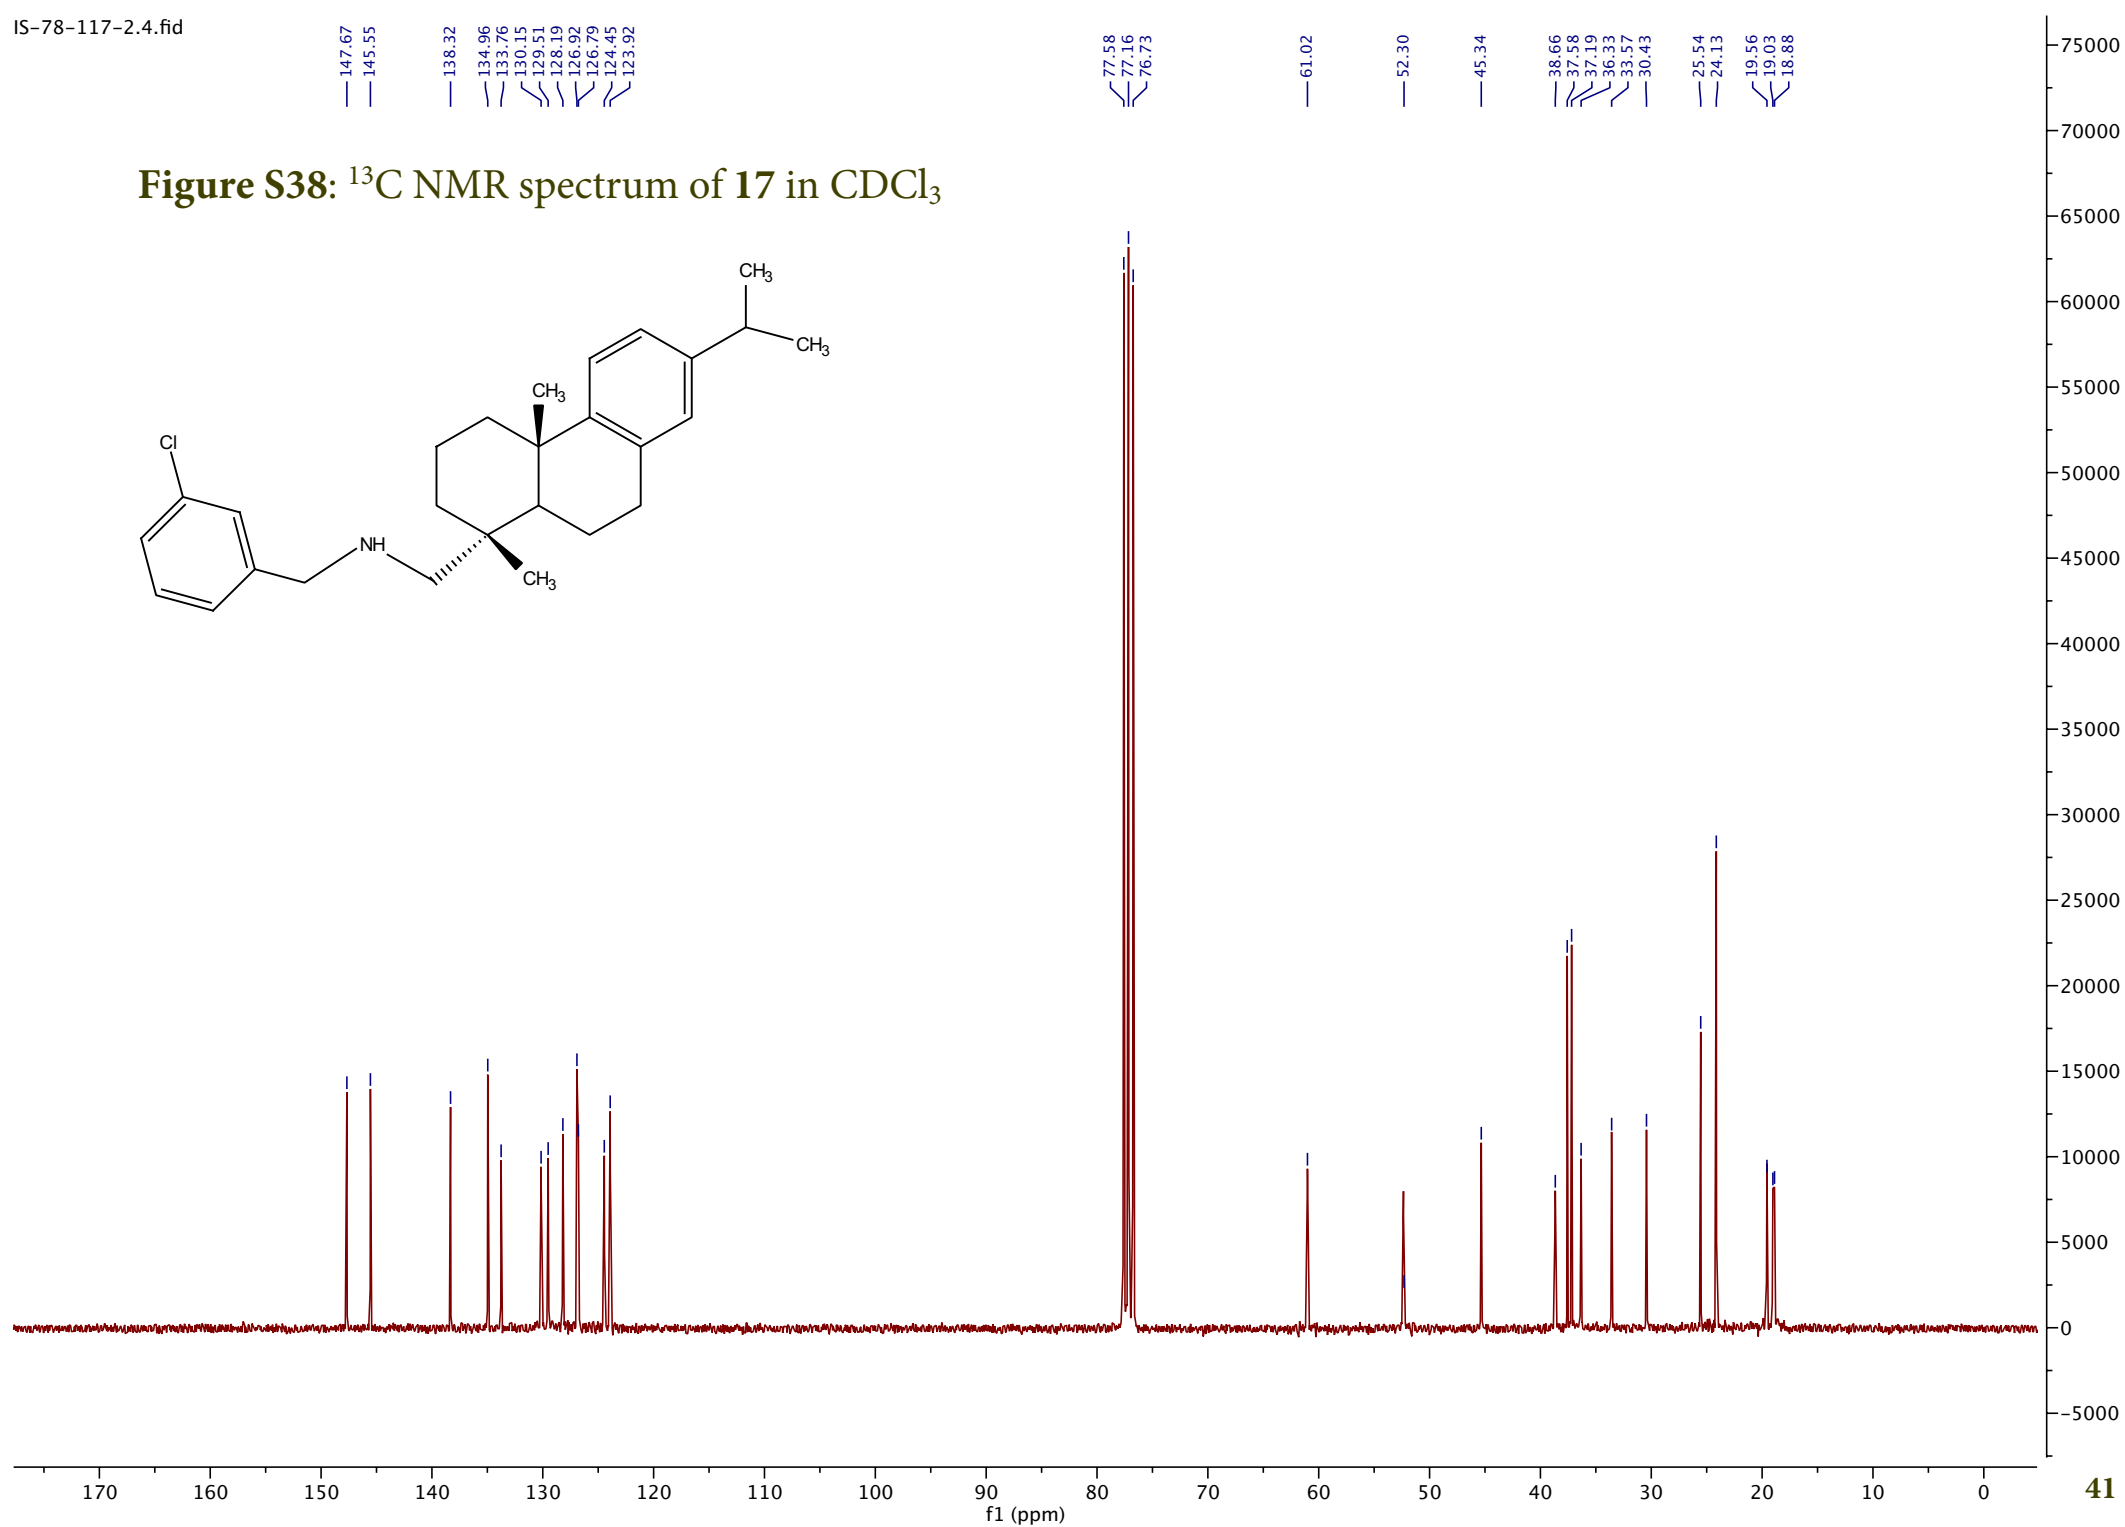

Figure S39: High resolution mass spectrum of 17

| Sample Name | Mol Fomula | MW(COME WITH SAMPLES) | MW(CALCULATED) | M+H      | observed        | delta   | ppm   |
|-------------|------------|-----------------------|----------------|----------|-----------------|---------|-------|
| IS-78-117   | C27H36ClN  | 409.2536              | 409.25362      | 410.2614 | <b>410.2611</b> | -0.0003 | -0.78 |
|             |            |                       | 411.25067      | 412.2585 | <b>412.2575</b> | -0.0010 | -2.35 |

IS-78-117 #582-599 RT: 3.79-3.88 AV: 18 NL: 1.91E8  
T: FTMS + c ESI Full ms [300.0000-900.0000]

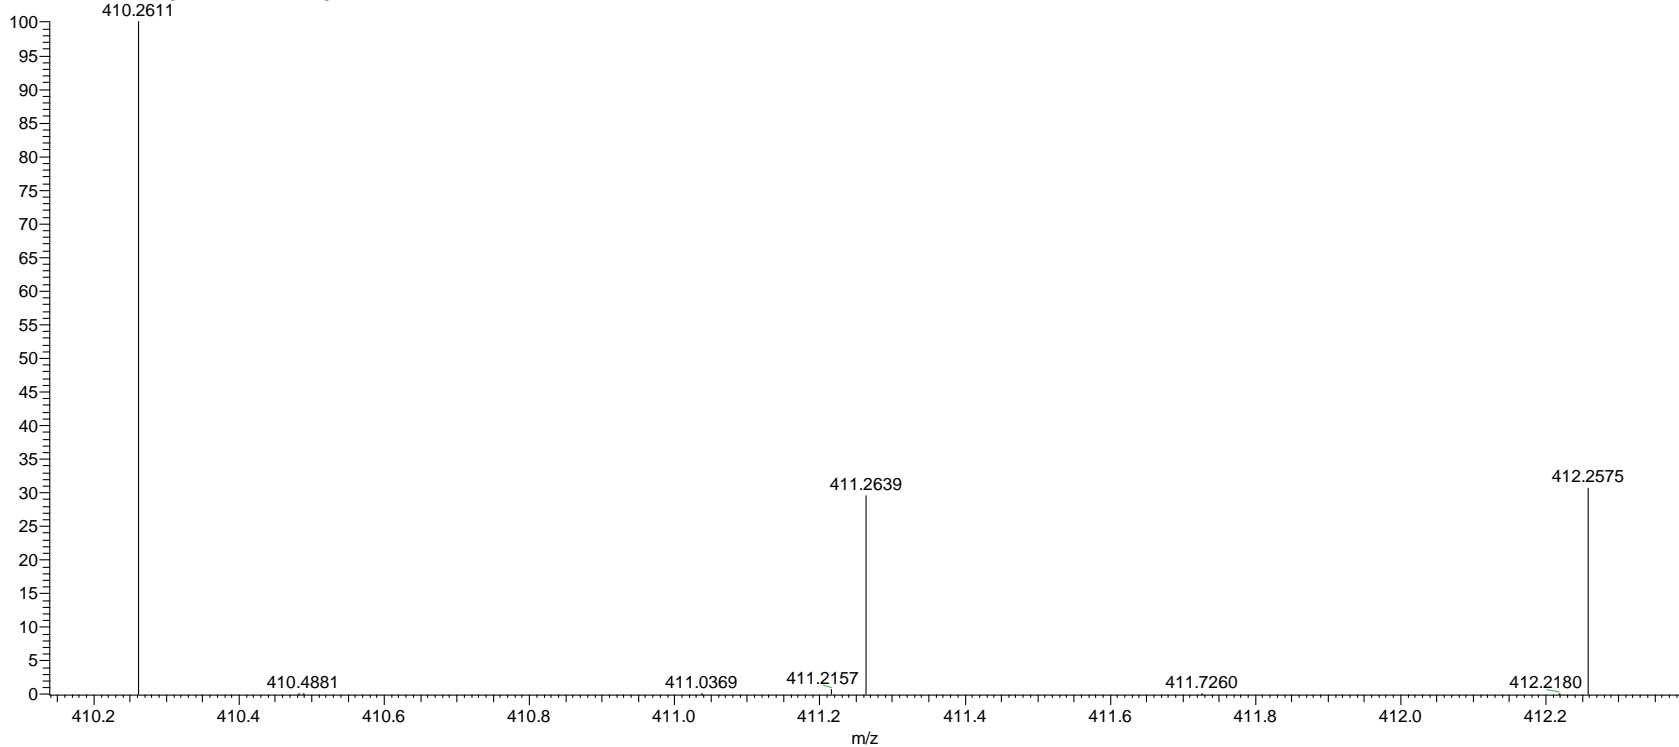

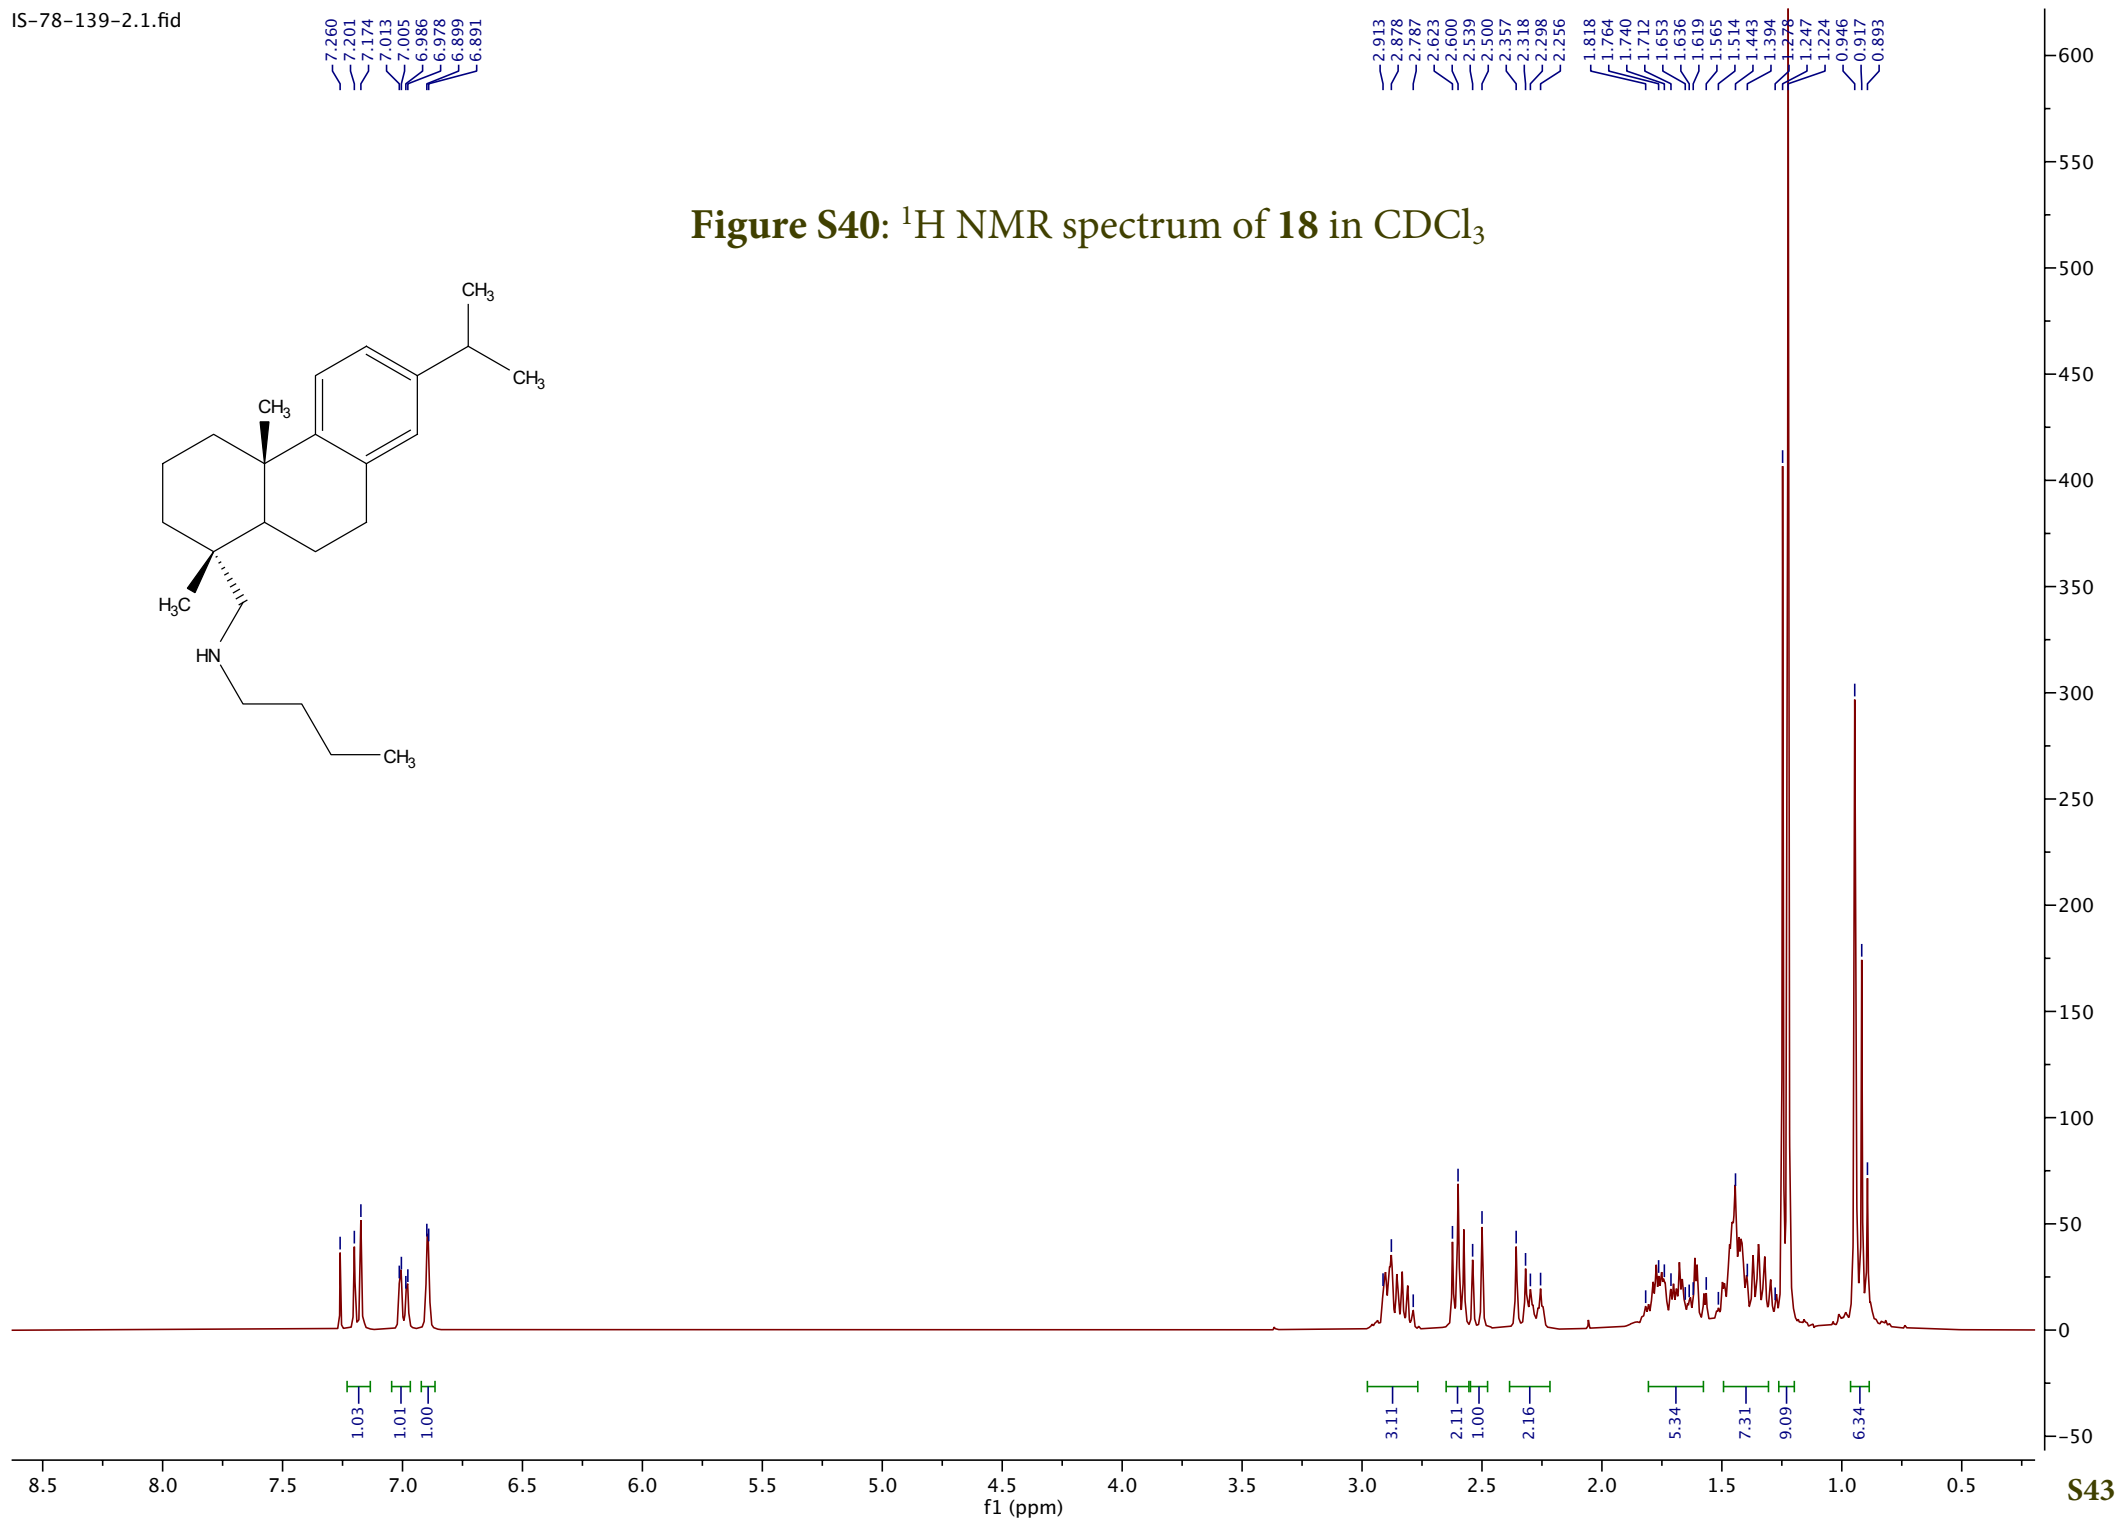

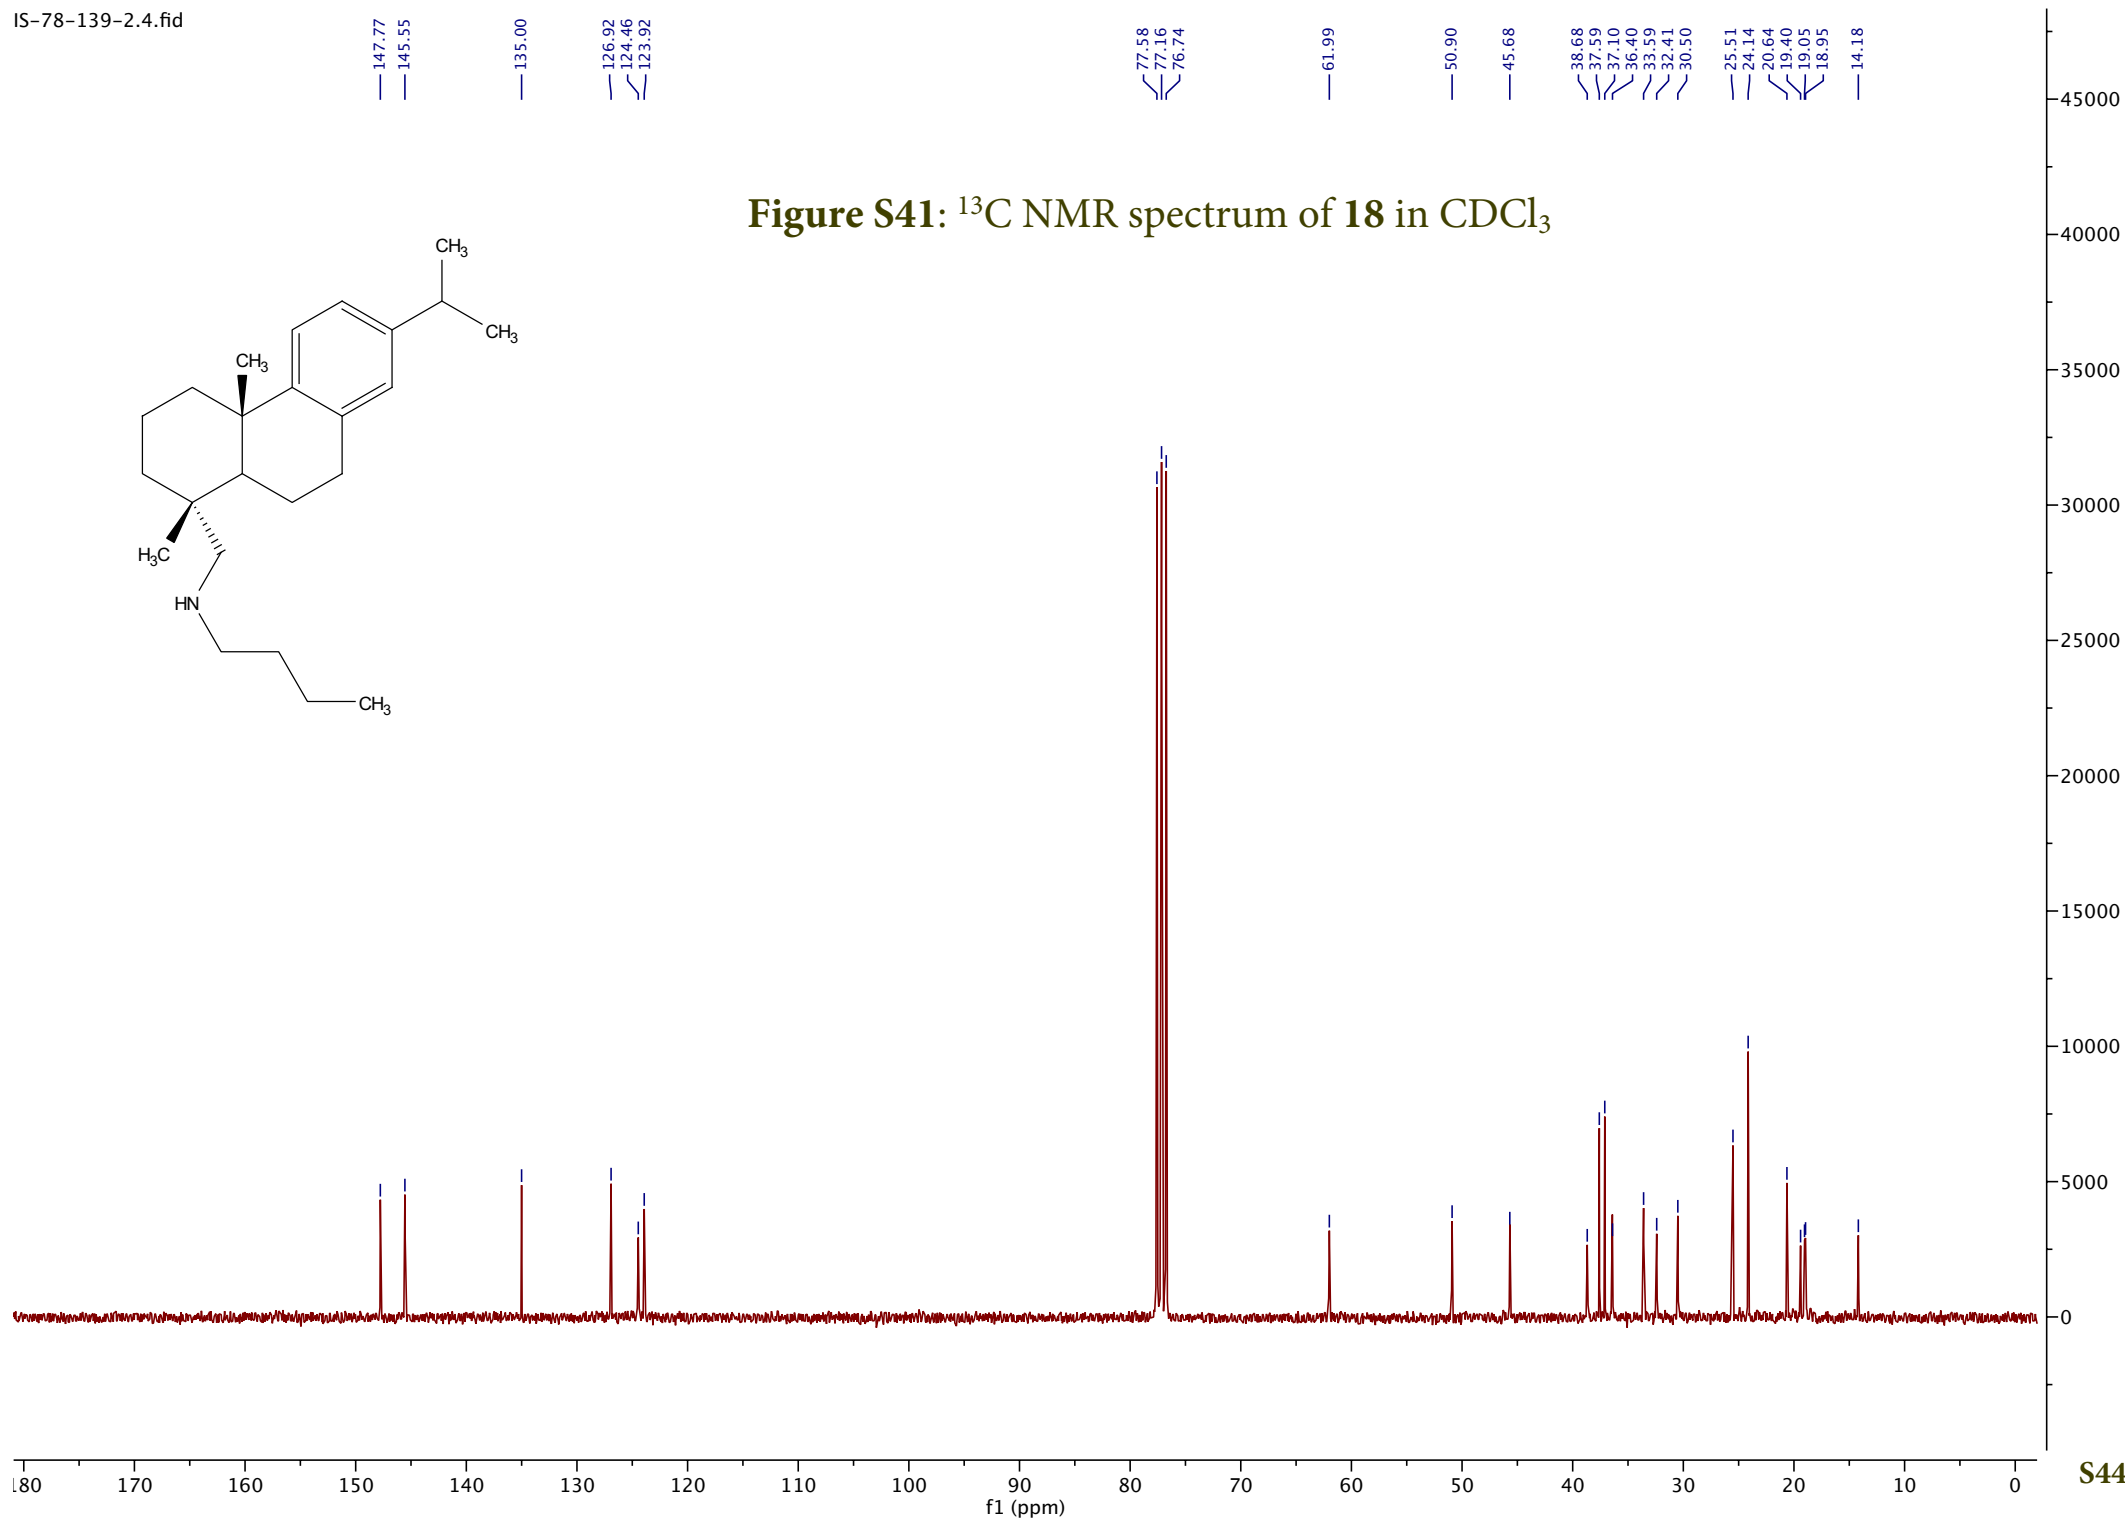

**Figure S42:** High resolution mass spectrum of **18**

| Sample Name | Mol Fomula | MW       | M+H      | observed | delta   | ppm   |
|-------------|------------|----------|----------|----------|---------|-------|
| IS-78-139-2 | C24H39N    | 341.3083 | 342.3161 | 342.3155 | -0.0005 | -1.61 |

IS--78-139-2 #1991-2005 RT: 10.46-10.53 AV: 15 NL: 9.12E8  
T: FTMS + c NSI Full ms [100.0000-1000.0000]

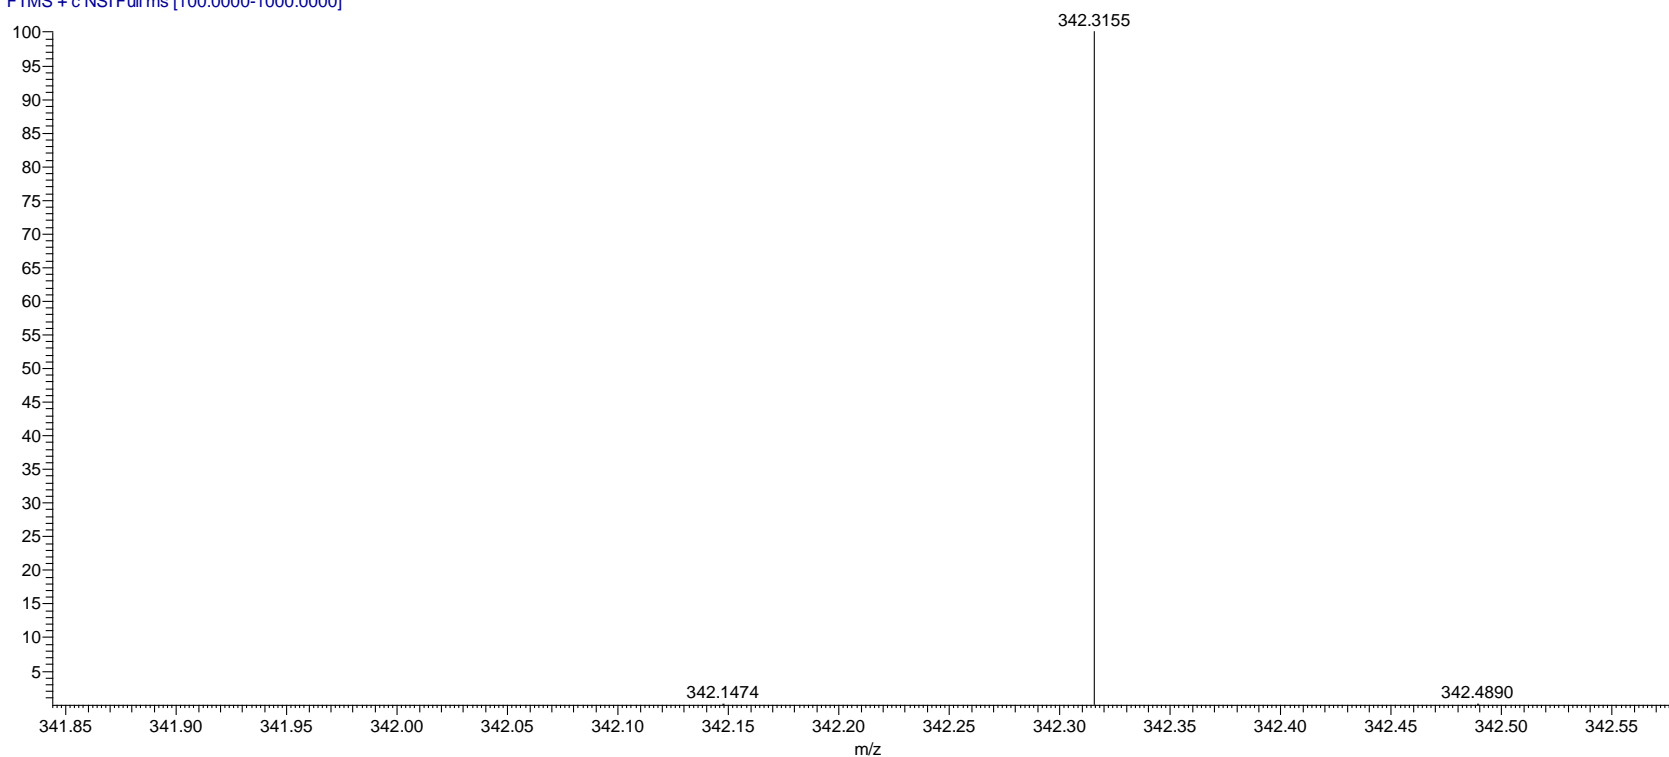

7.260  
7.200  
7.172  
7.011  
7.003  
6.984  
6.976  
6.899  
6.891

4.230  
4.206  
4.183  
4.159

3.458  
3.400  
3.361  
3.304

2.930  
2.917  
2.787

2.584  
2.545

2.303  
2.265

1.826  
1.692  
1.566

1.313  
1.289  
1.266  
1.248  
1.232  
1.225  
0.944

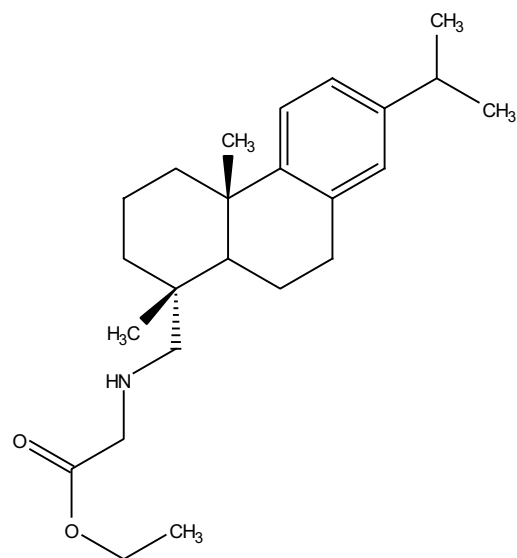

**Figure S43:** <sup>1</sup>H NMR spectrum of **19** in CDCl<sub>3</sub>

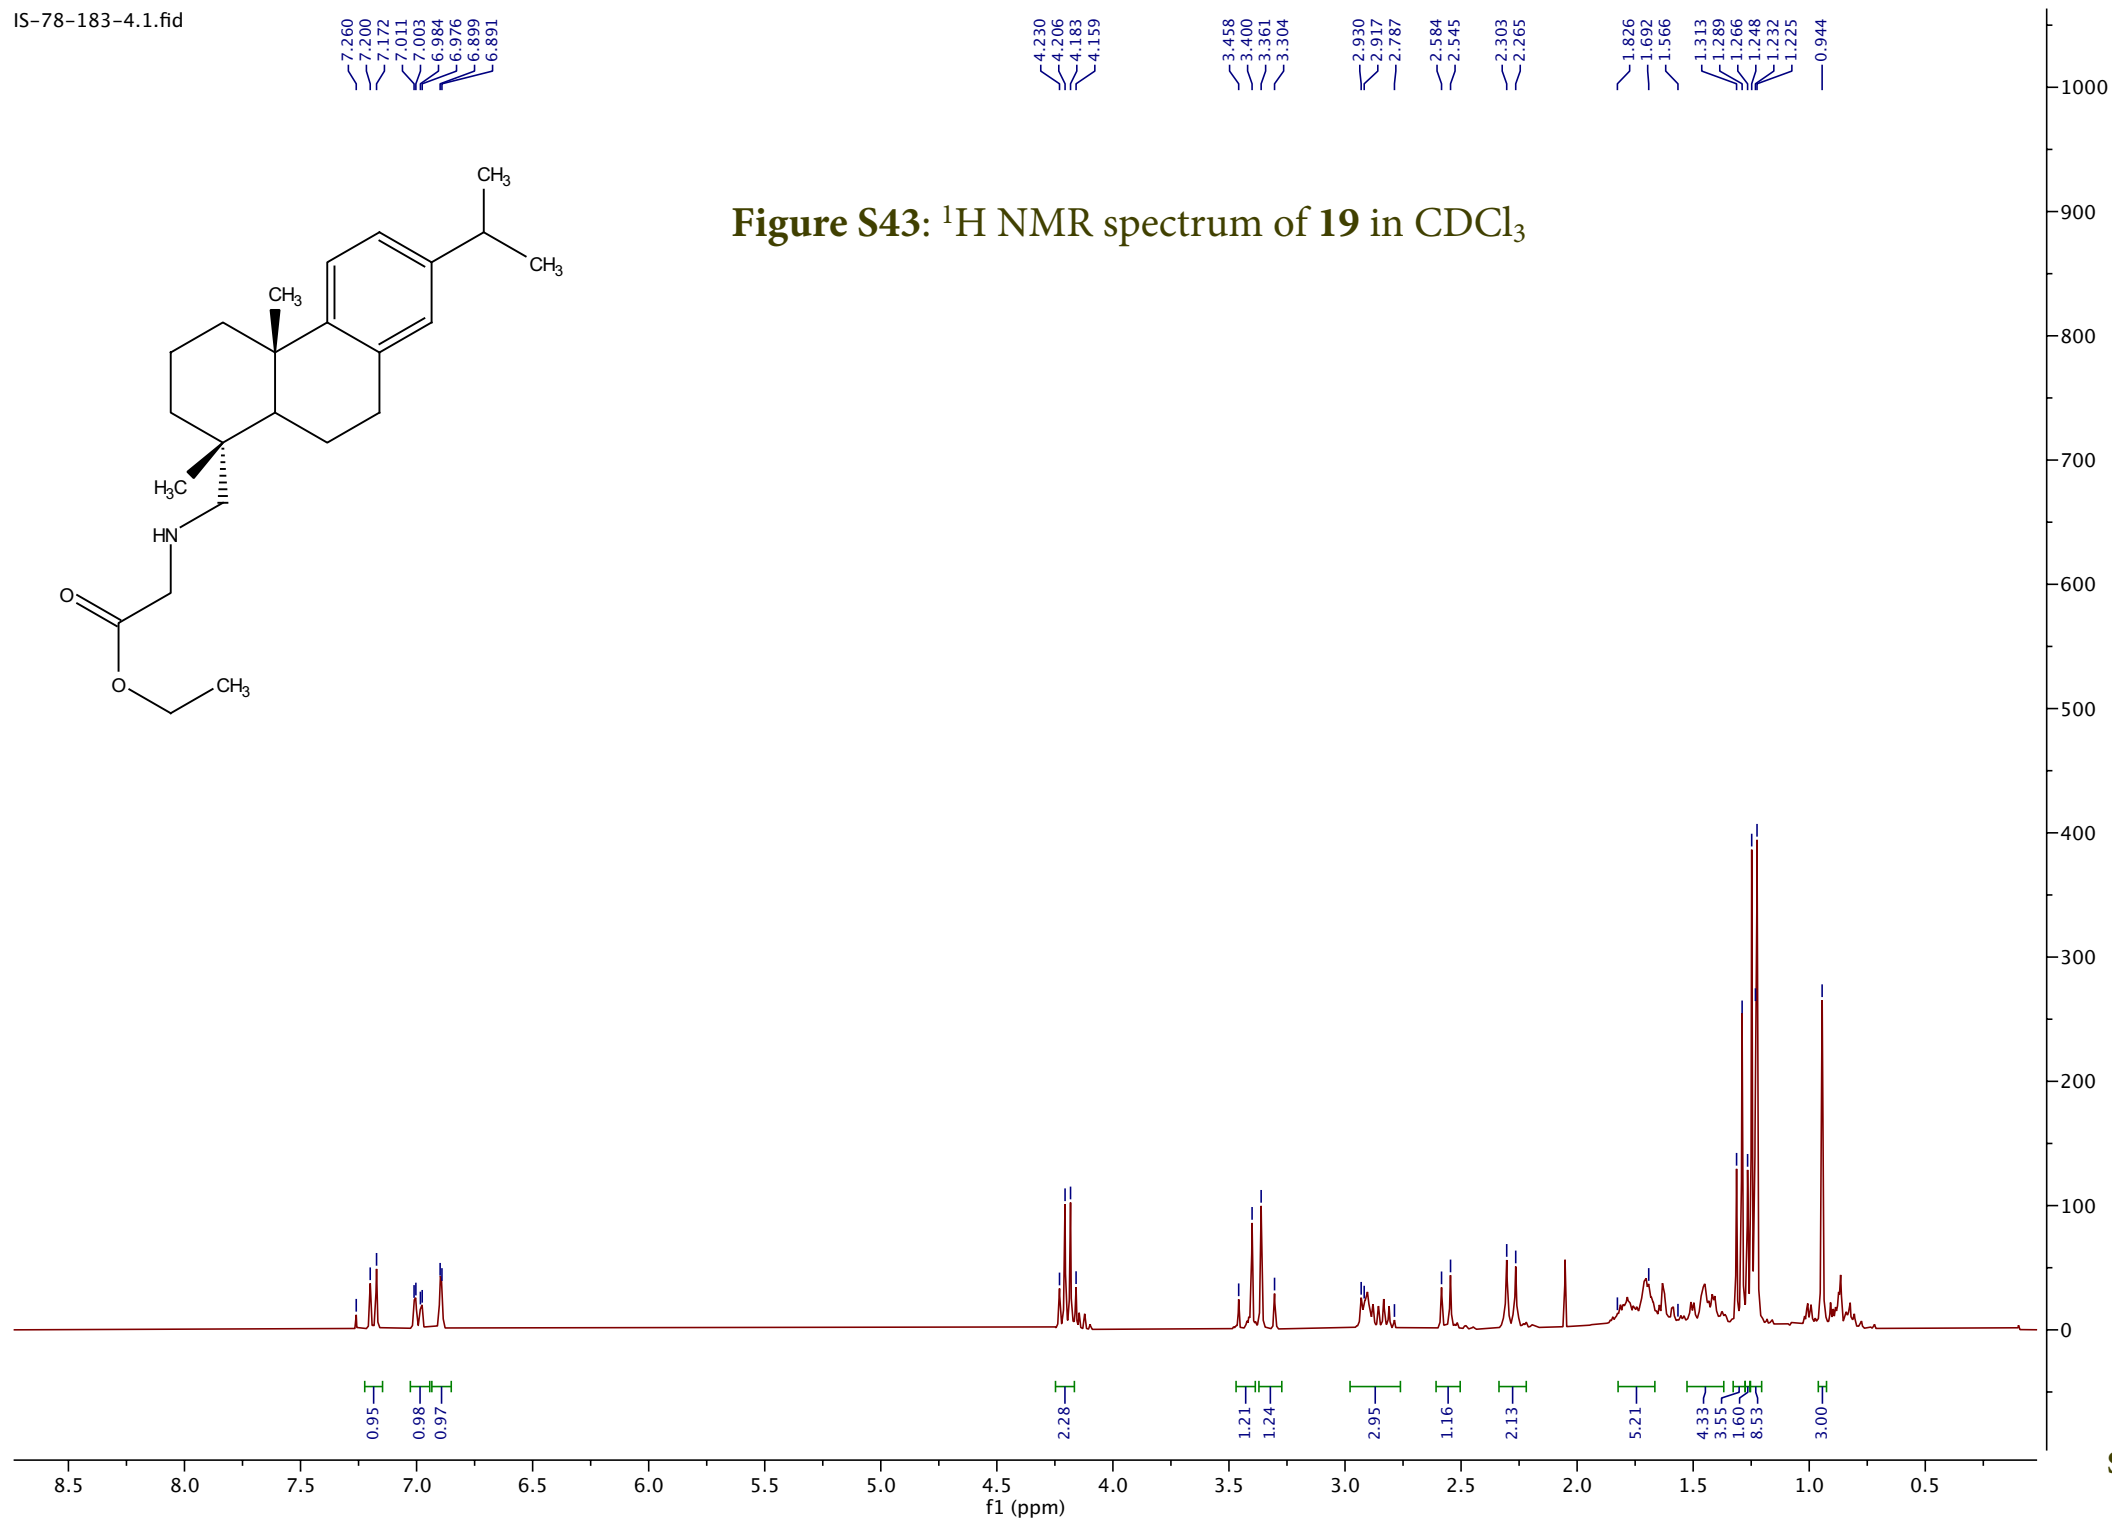

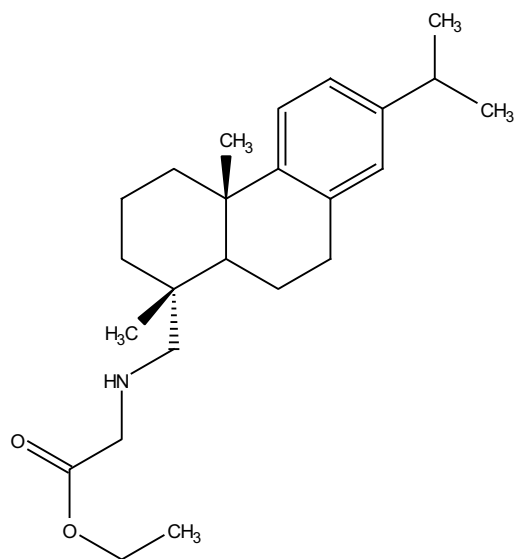

**Figure S44:** <sup>13</sup>C NMR spectrum of **19** in CDCl<sub>3</sub>

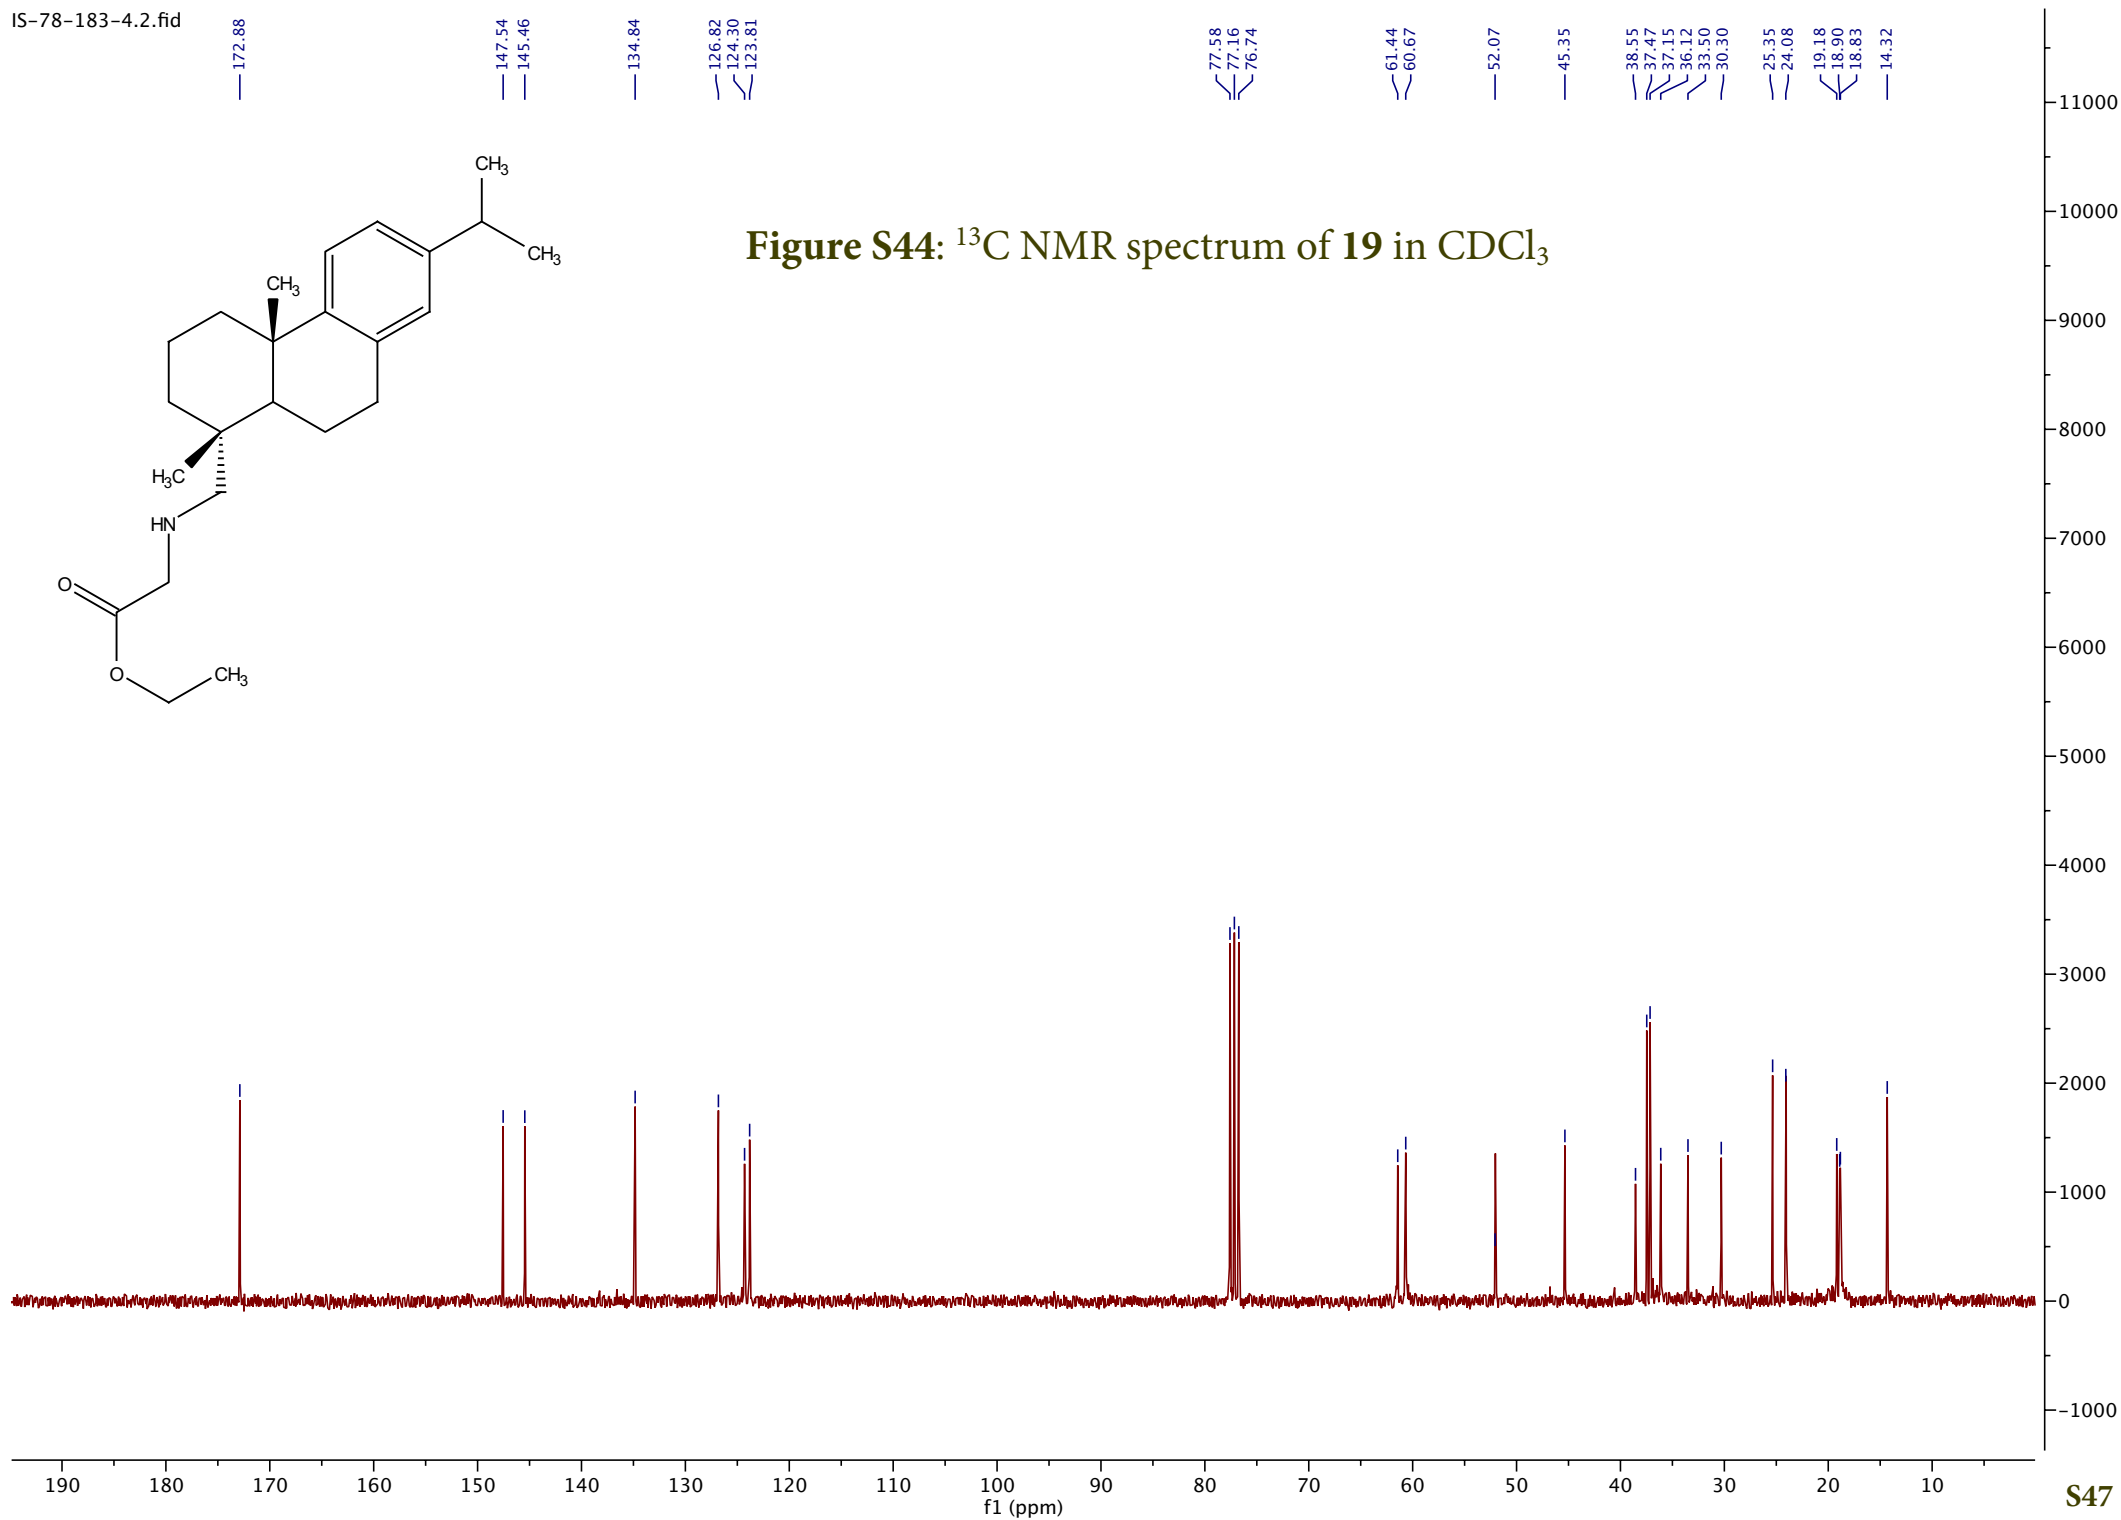

**Figure S45:** High resolution mass spectrum of **19**

| Sample Name | Mol Fomula | MW       | M+H      | observed | delta   | ppm   |
|-------------|------------|----------|----------|----------|---------|-------|
| IS-78-183-4 | C24H37NO2  | 371.2824 | 372.2902 | 372.2896 | -0.0006 | -1.69 |

IS-78-183-4 #1951-1955 RT: 10.37-10.39 AV: 5 NL: 5.40E8  
T: FTMS + c NSI Full ms [100.0000-1000.0000]

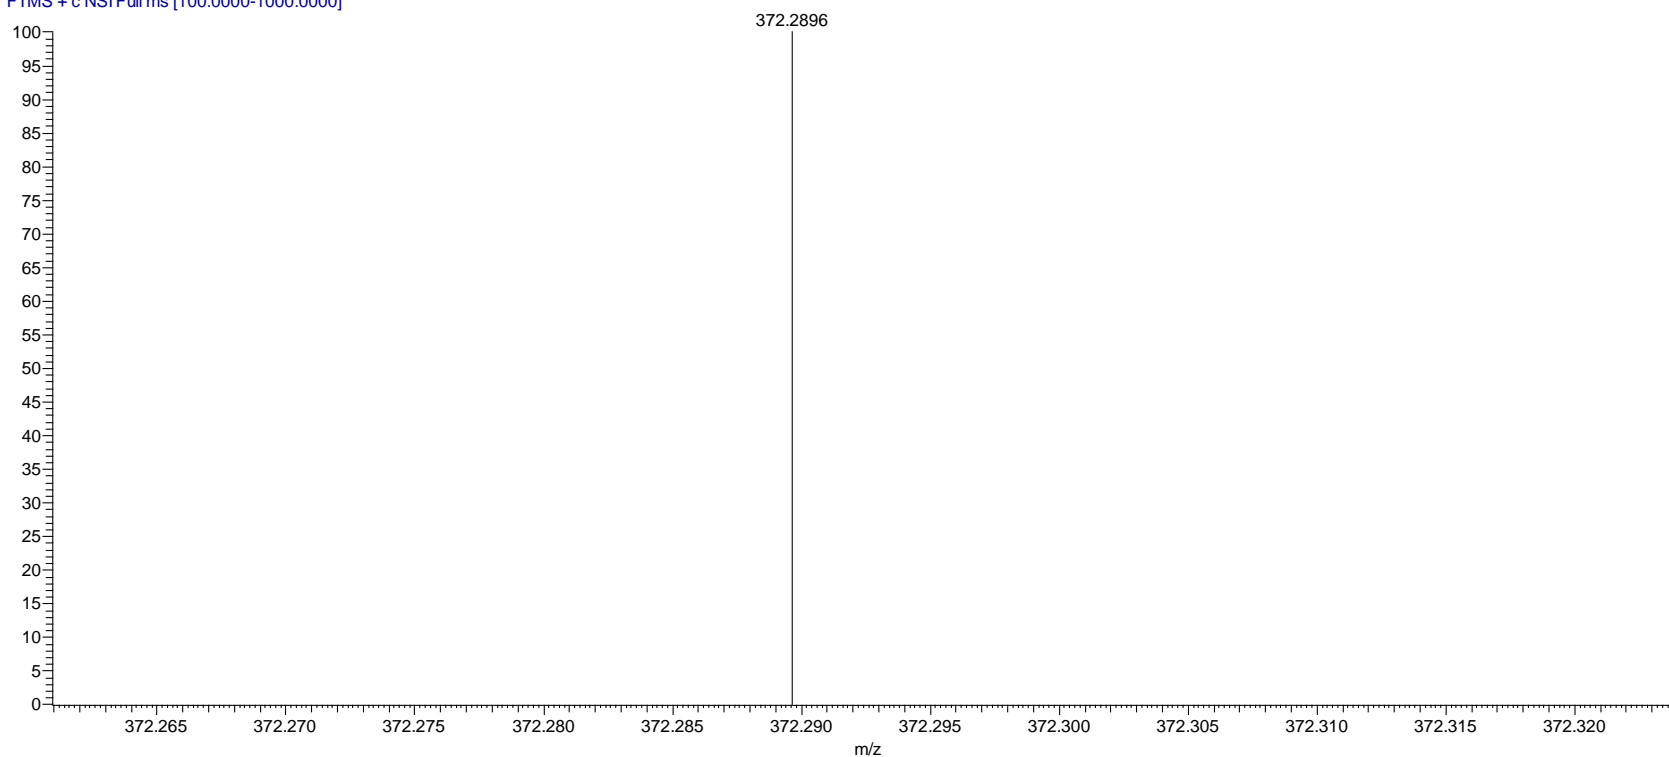



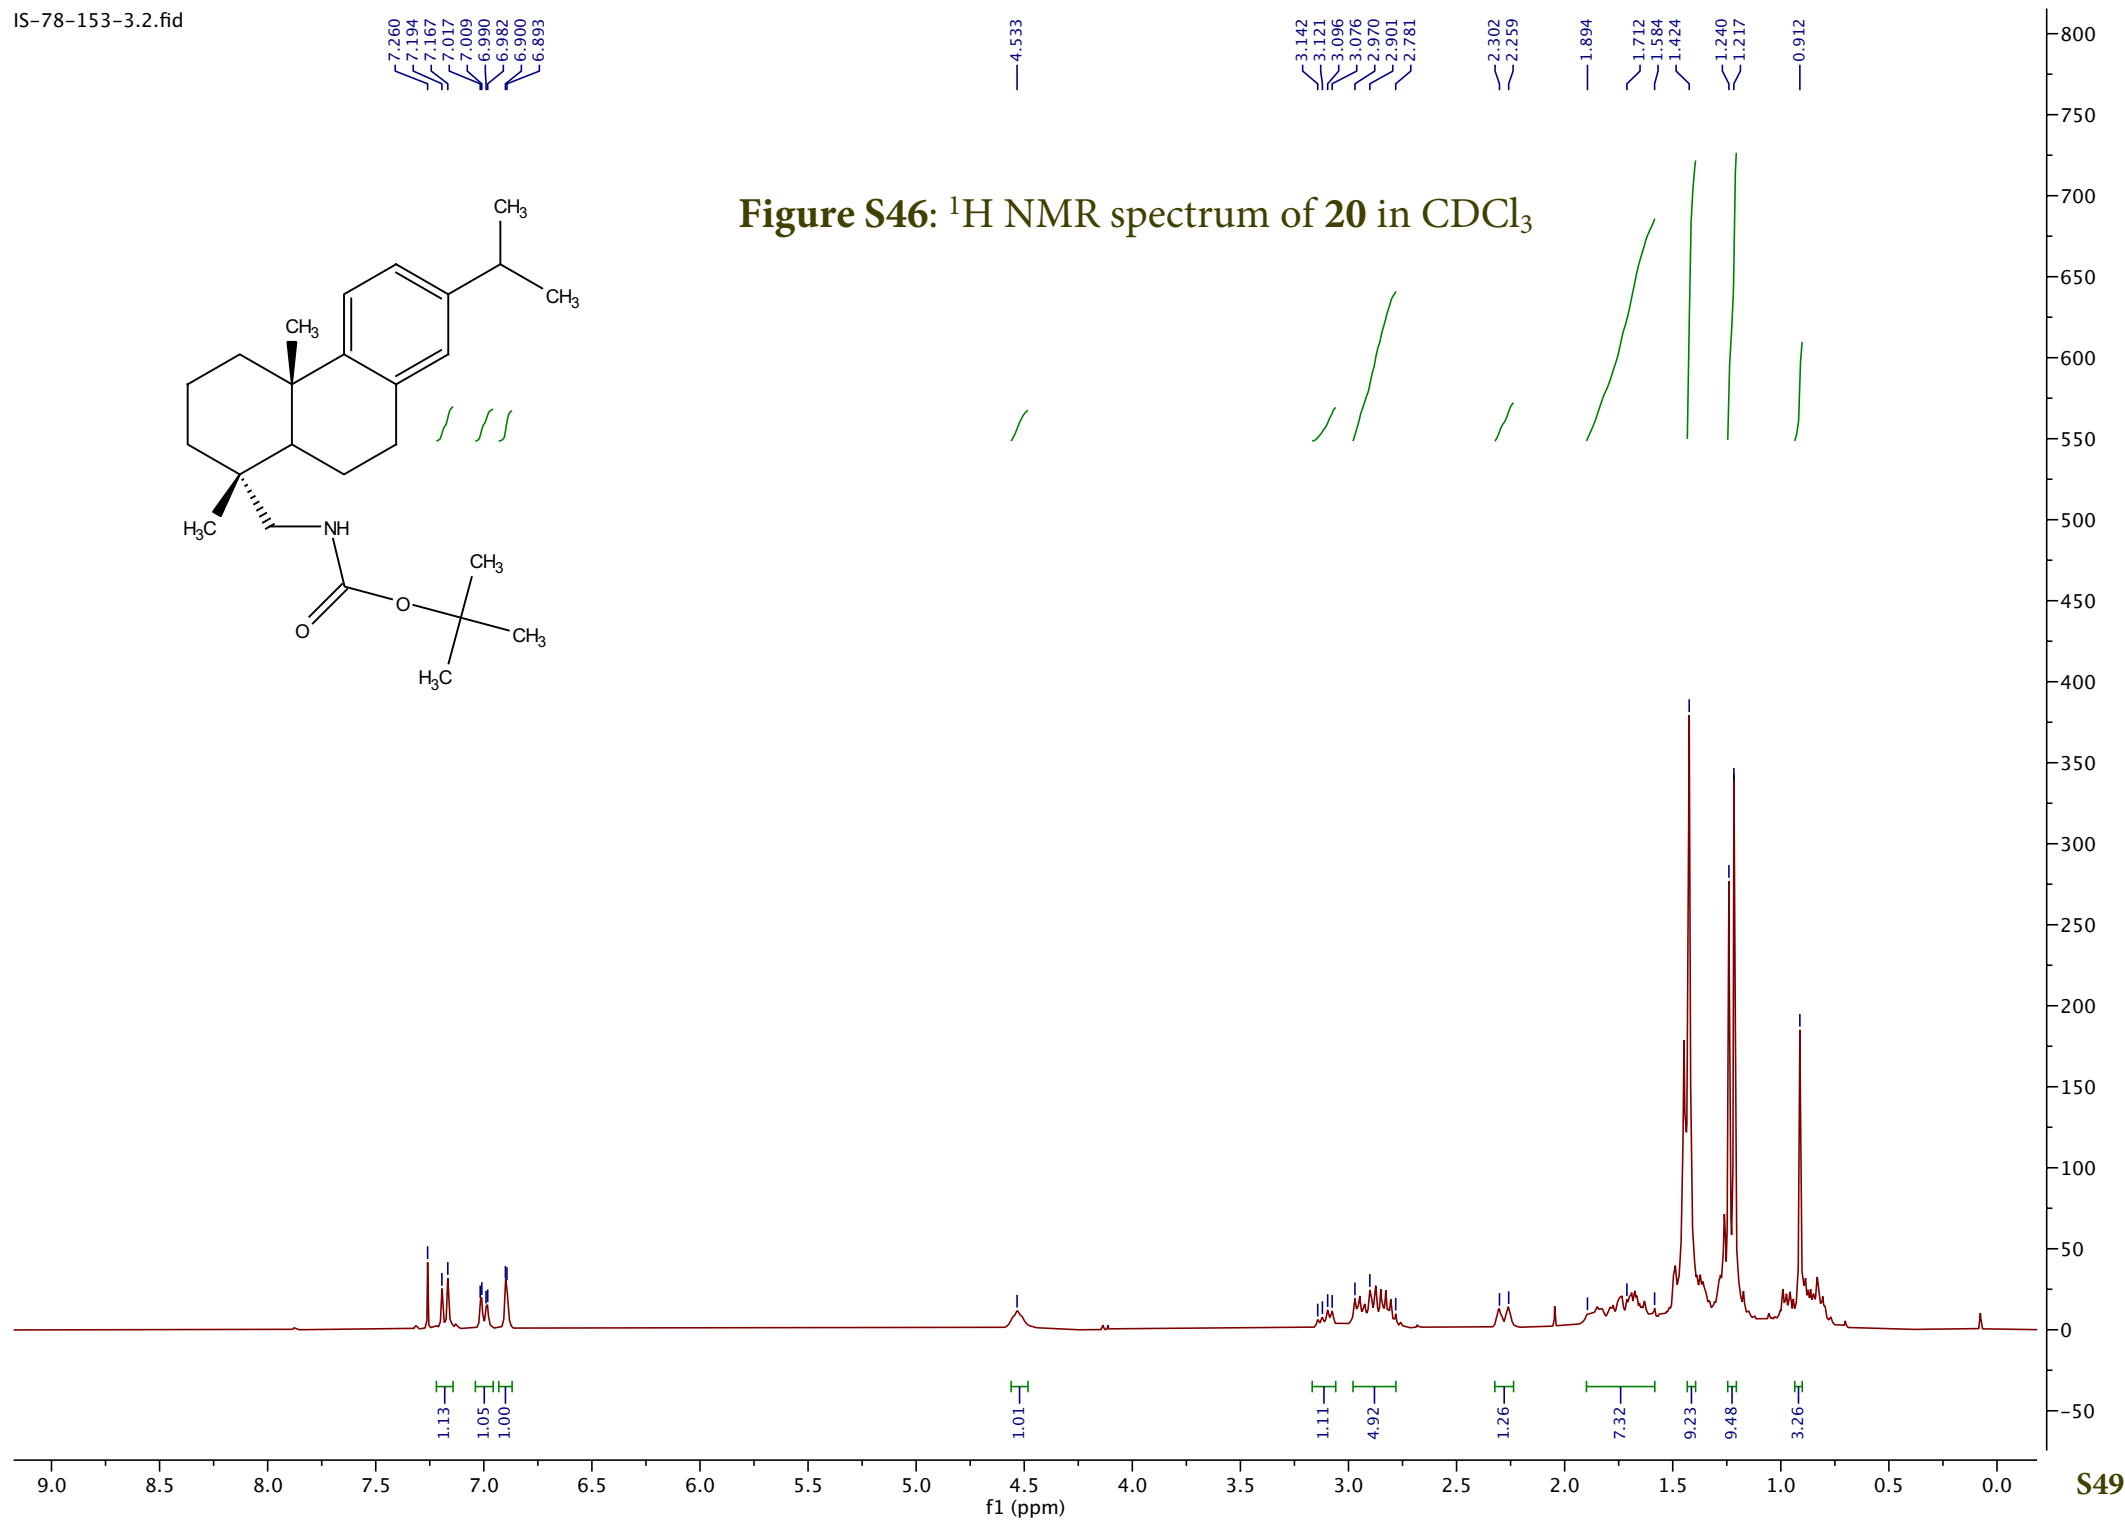

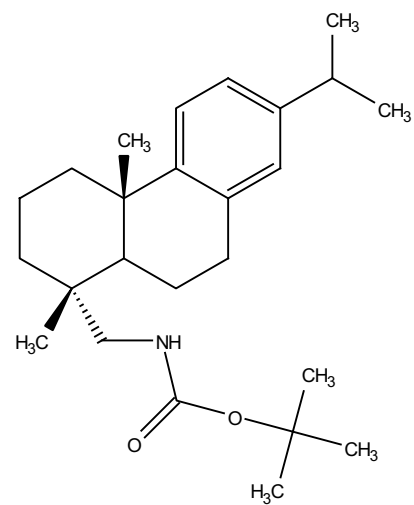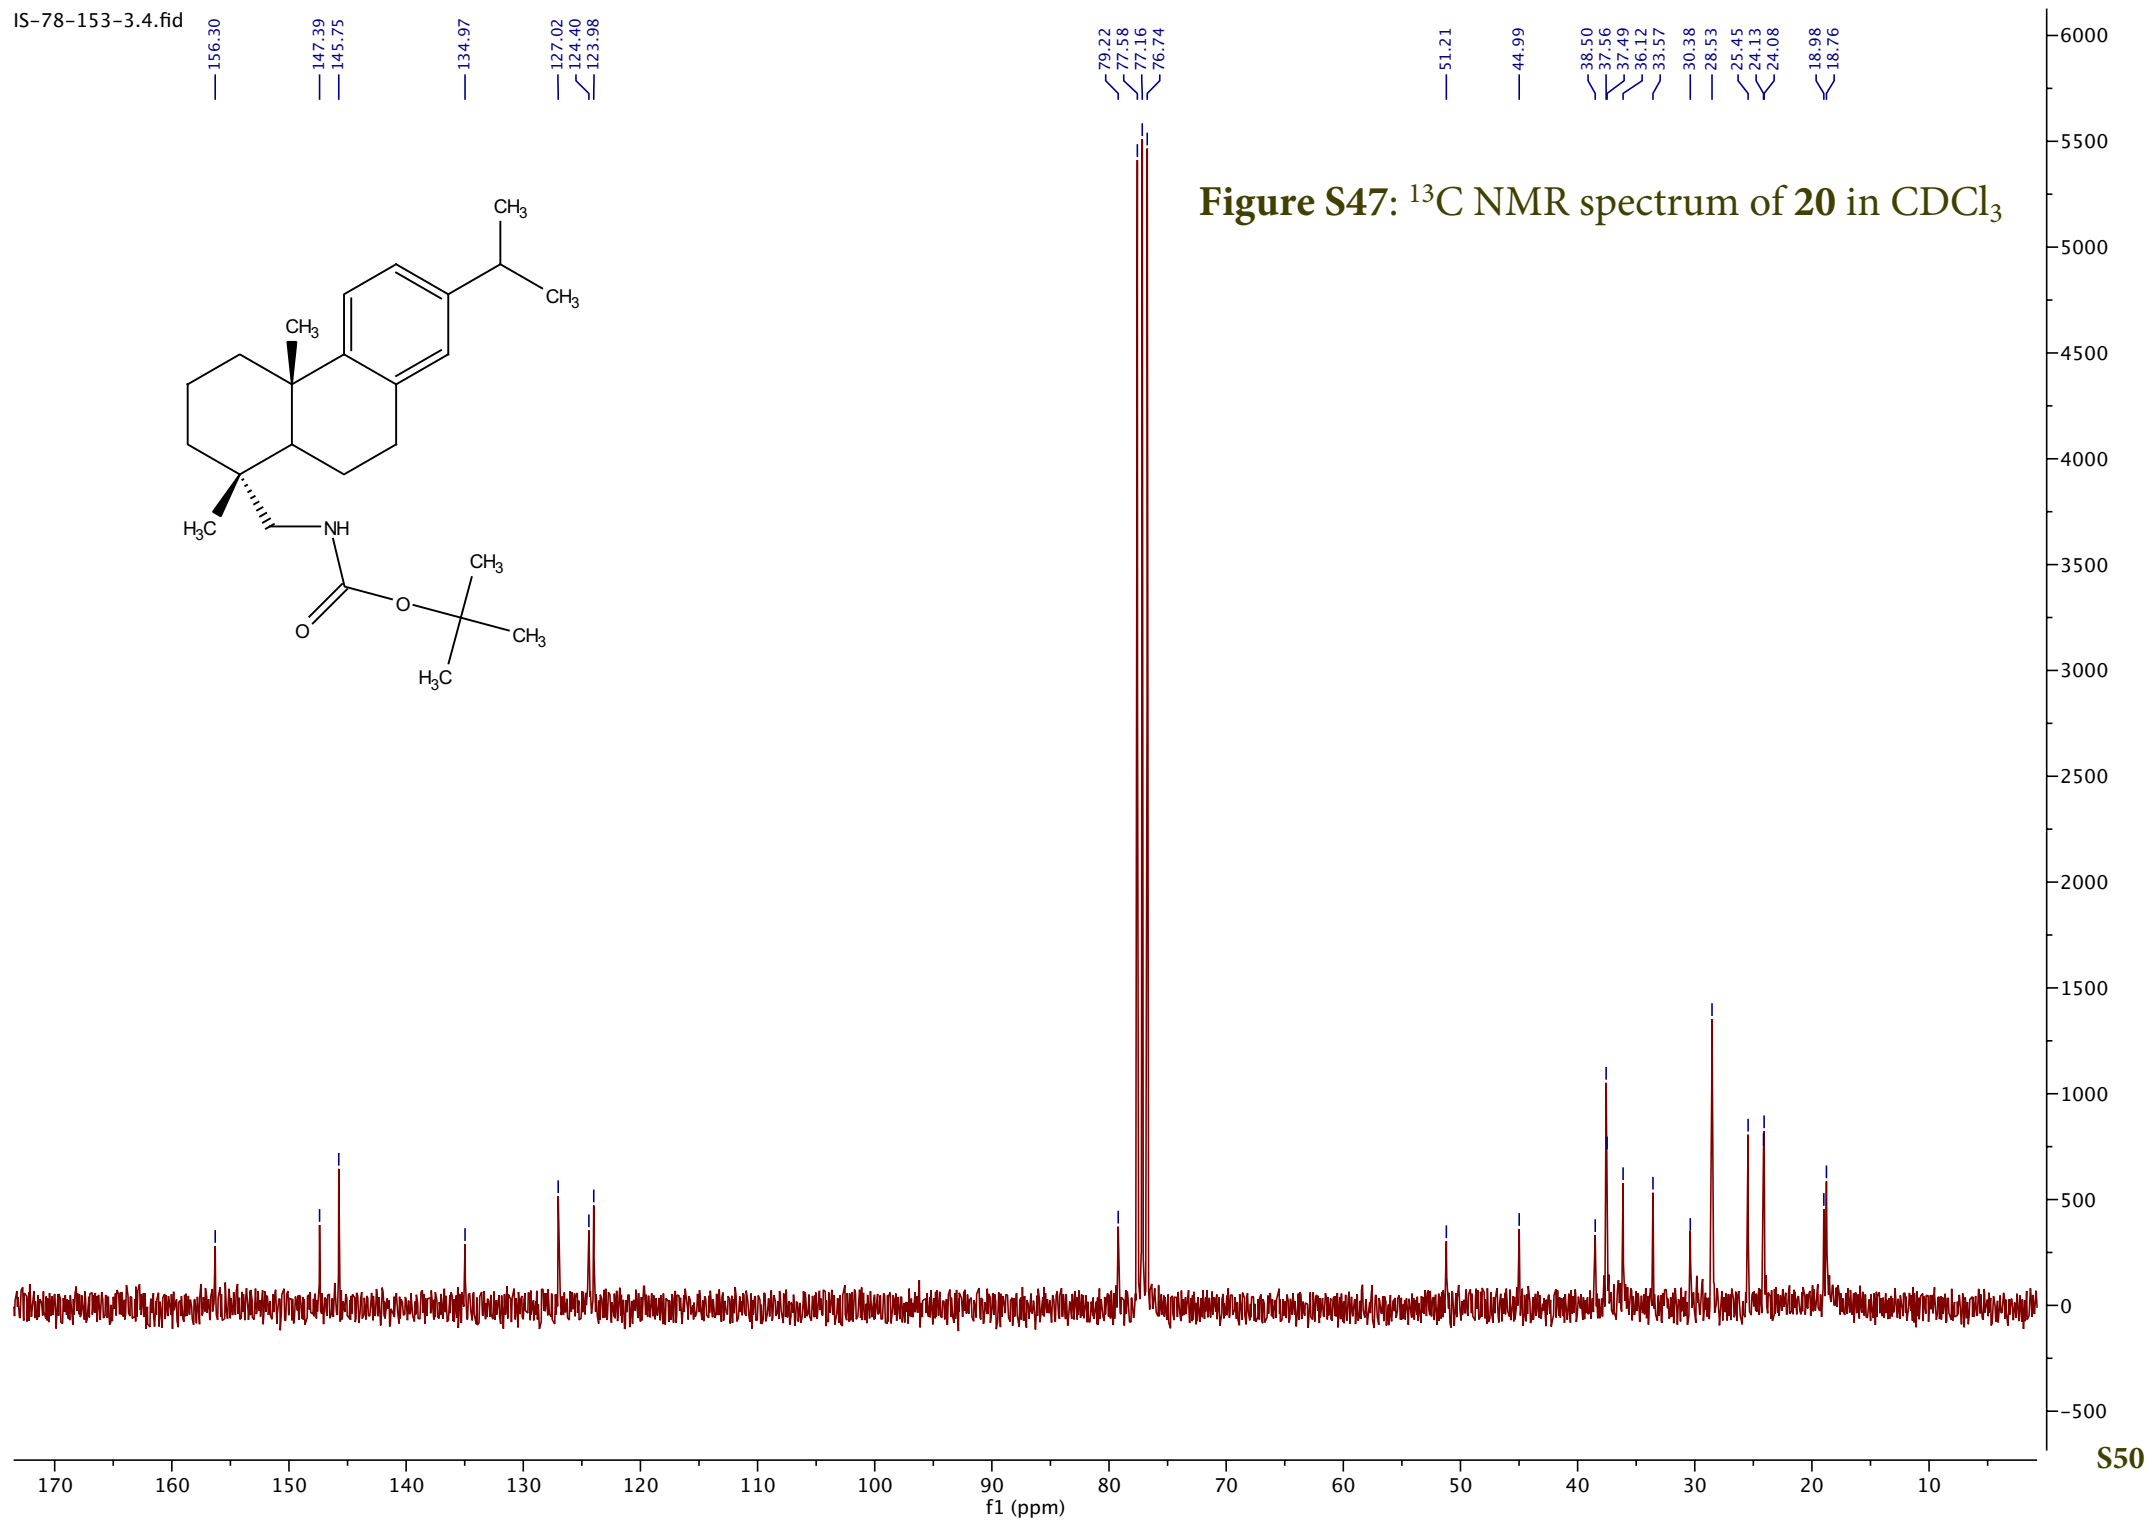

Figure S48: High resolution mass spectrum of 20

| Sample Name            | Mol Fomula | MW       | M+H      | observed | delta   | ppm   |
|------------------------|------------|----------|----------|----------|---------|-------|
| IS-78-153(IS-78-153-3) | C25H39NO2  | 385.2981 | 386.3059 | 386.3051 | -0.0008 | -2.05 |

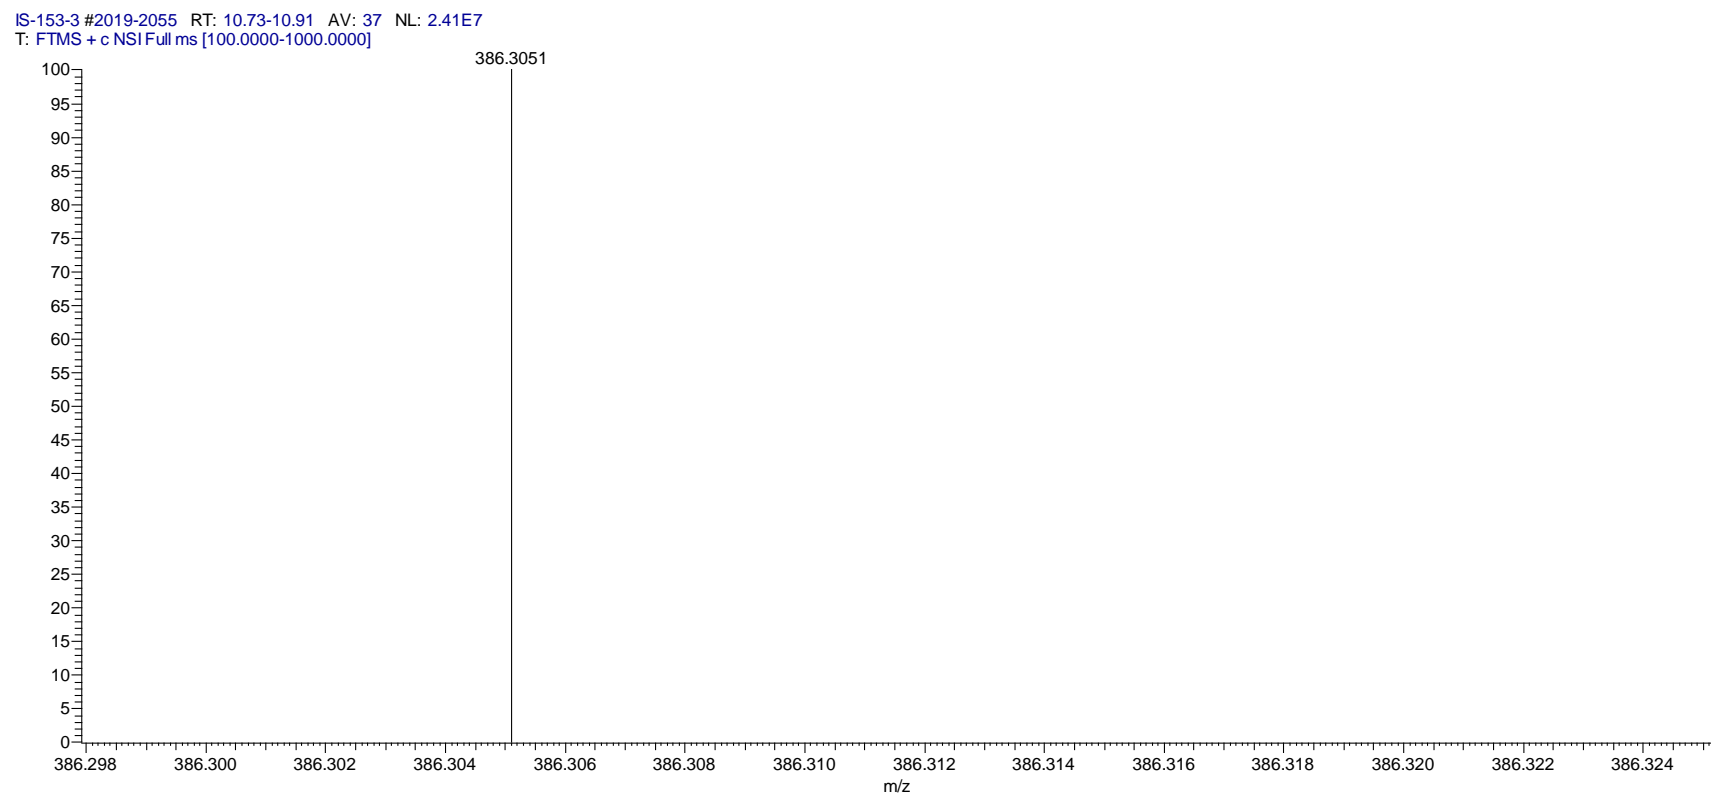

7.26  
7.19  
7.16  
7.02  
7.01  
6.98  
6.90

5.58

3.27  
3.25  
3.22  
3.20  
3.12  
3.10  
3.07  
3.05  
2.91  
2.90  
2.88  
2.87  
2.85  
2.83  
2.80  
2.78

2.31  
2.27  
1.98  
1.88  
1.85  
1.76  
1.75  
1.74  
1.73  
1.71  
1.69  
1.68  
1.67  
1.65  
1.44  
1.43  
1.39  
1.37  
1.23  
1.21  
0.94

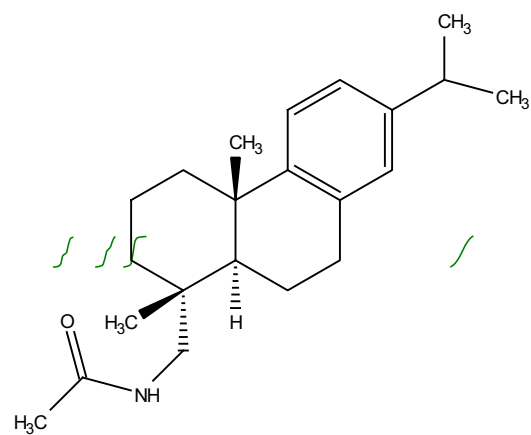

**Figure S49:**  $^1\text{H}$  NMR spectrum of **21** in  $\text{CDCl}_3$

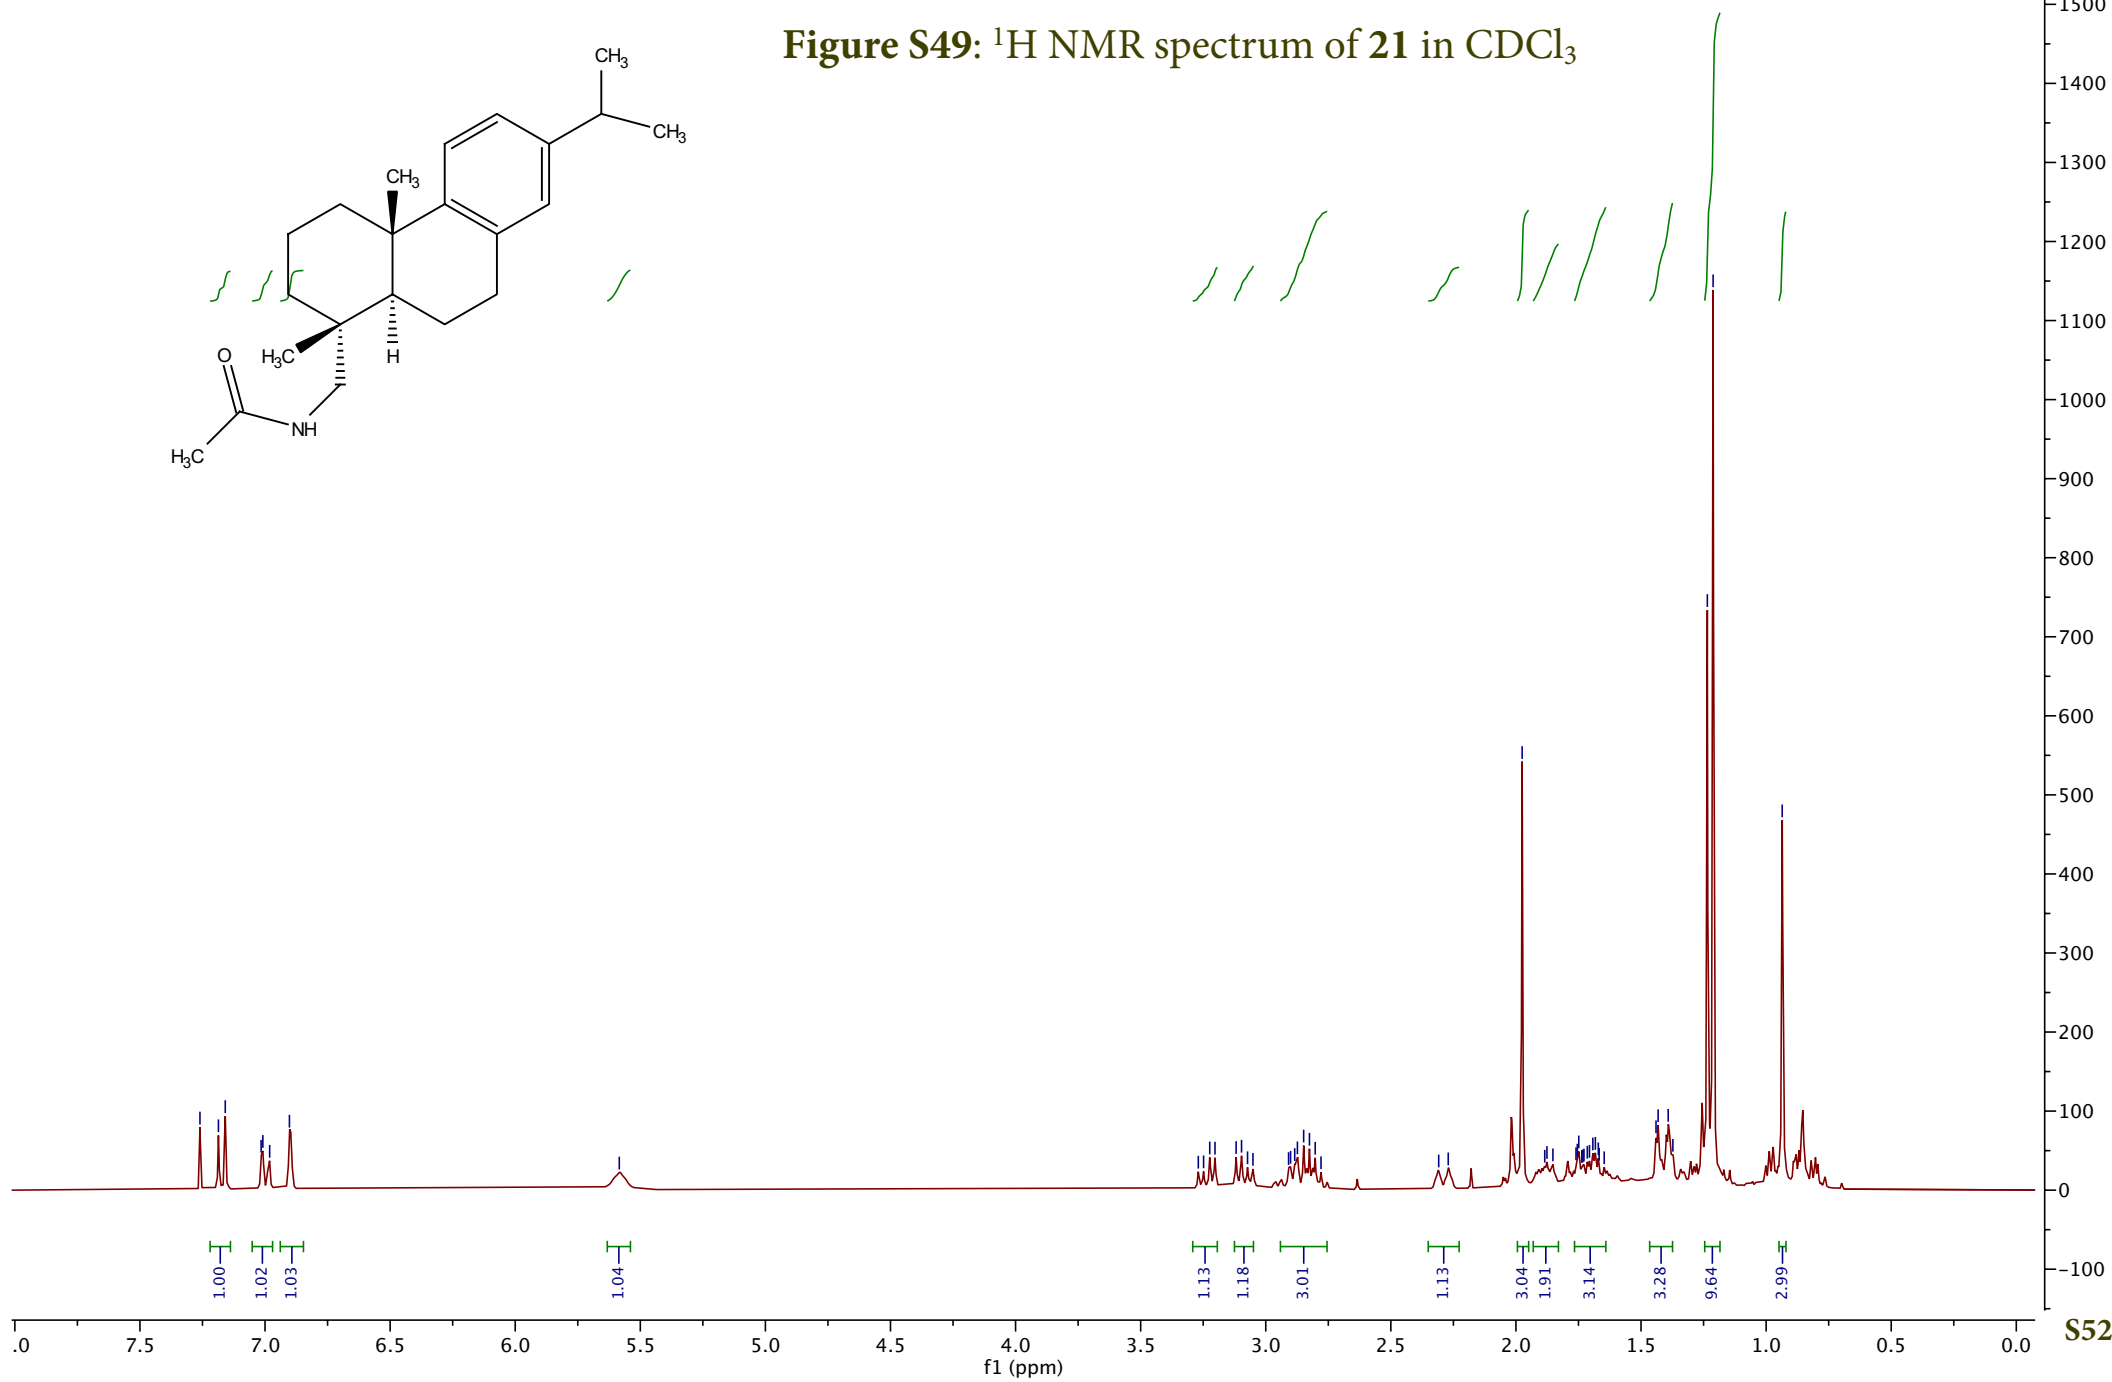

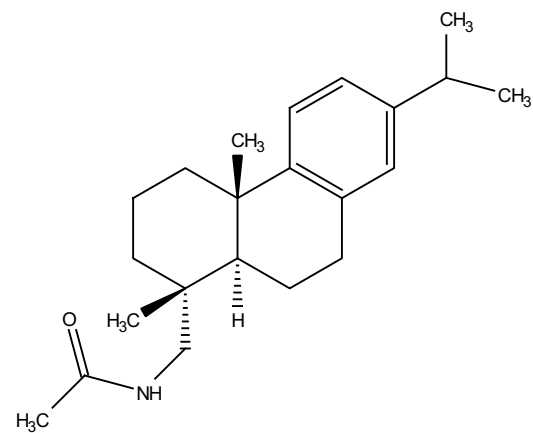

**Figure S50:** <sup>13</sup>C NMR spectrum of **21** in CDCl<sub>3</sub>

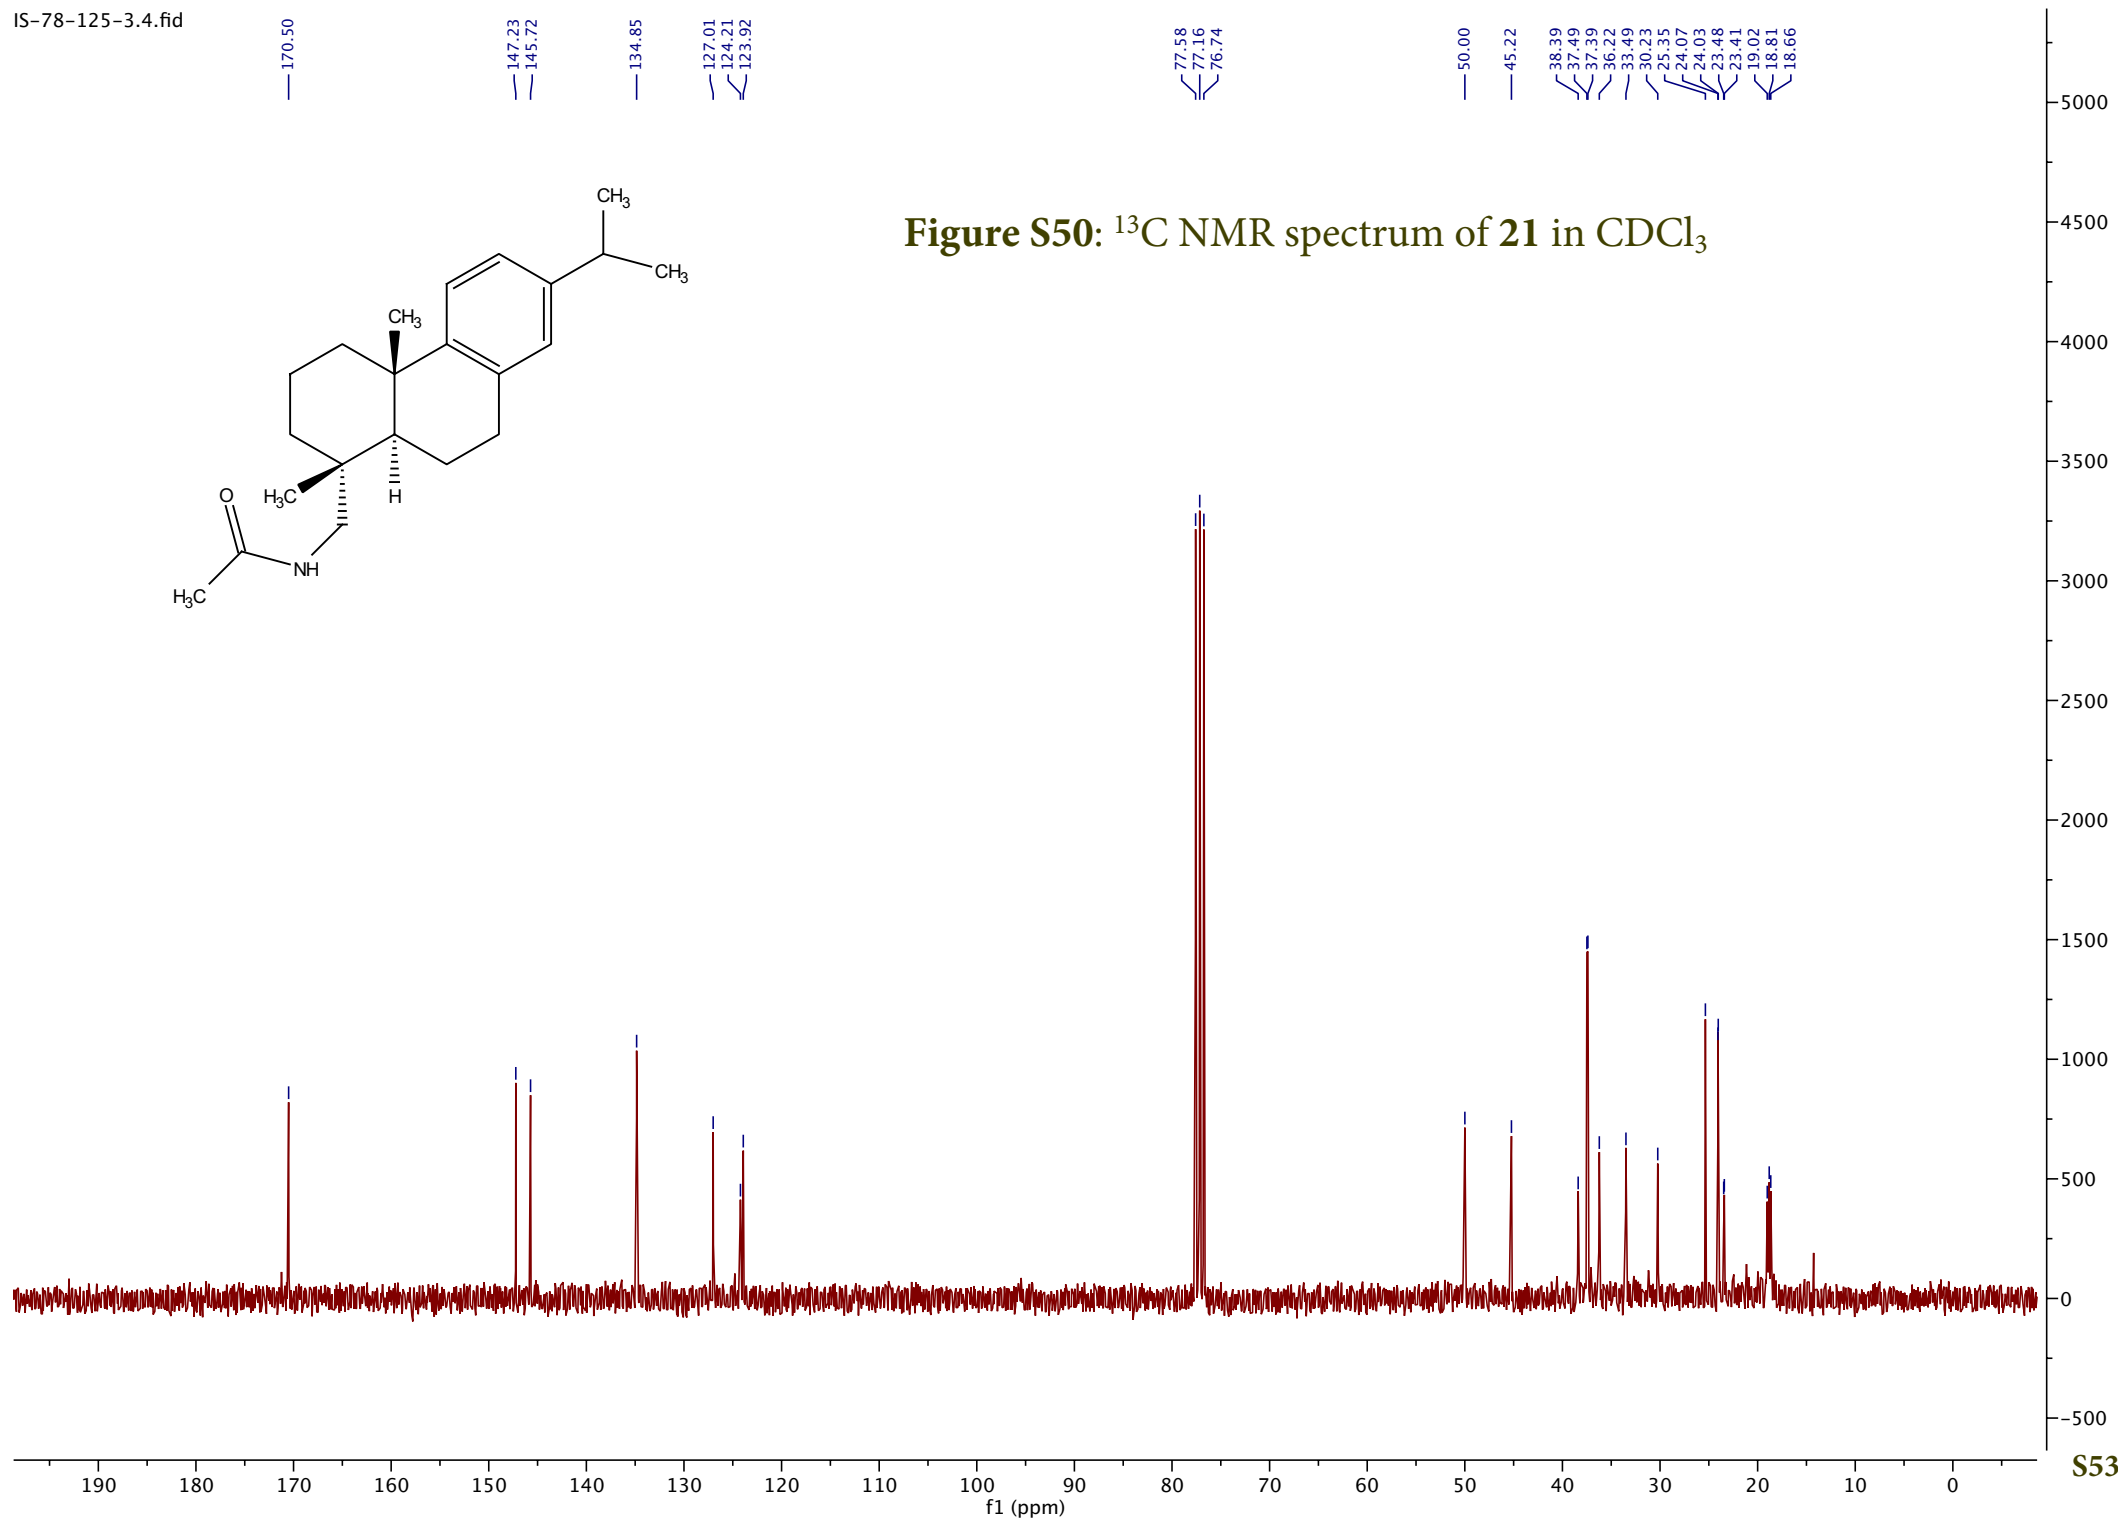

Figure S51: High resolution mass spectrum of **21**

| Sample Name | Mol Fomula | MW(COME WITH SAMPLES) | MW(CALCULATED) | M+H      | observed | delta   | ppm   |
|-------------|------------|-----------------------|----------------|----------|----------|---------|-------|
| IS-78-125-3 | C22H33NO   | 328.264               | 327.25621      | 328.2640 | 328.2639 | -0.0001 | -0.34 |

IS-78-125-3 #601-623 RT: 3.89-4.00 AV: 23 NL: 3.28E7  
T: FTMS + c ESI Full ms [300.0000-900.0000]

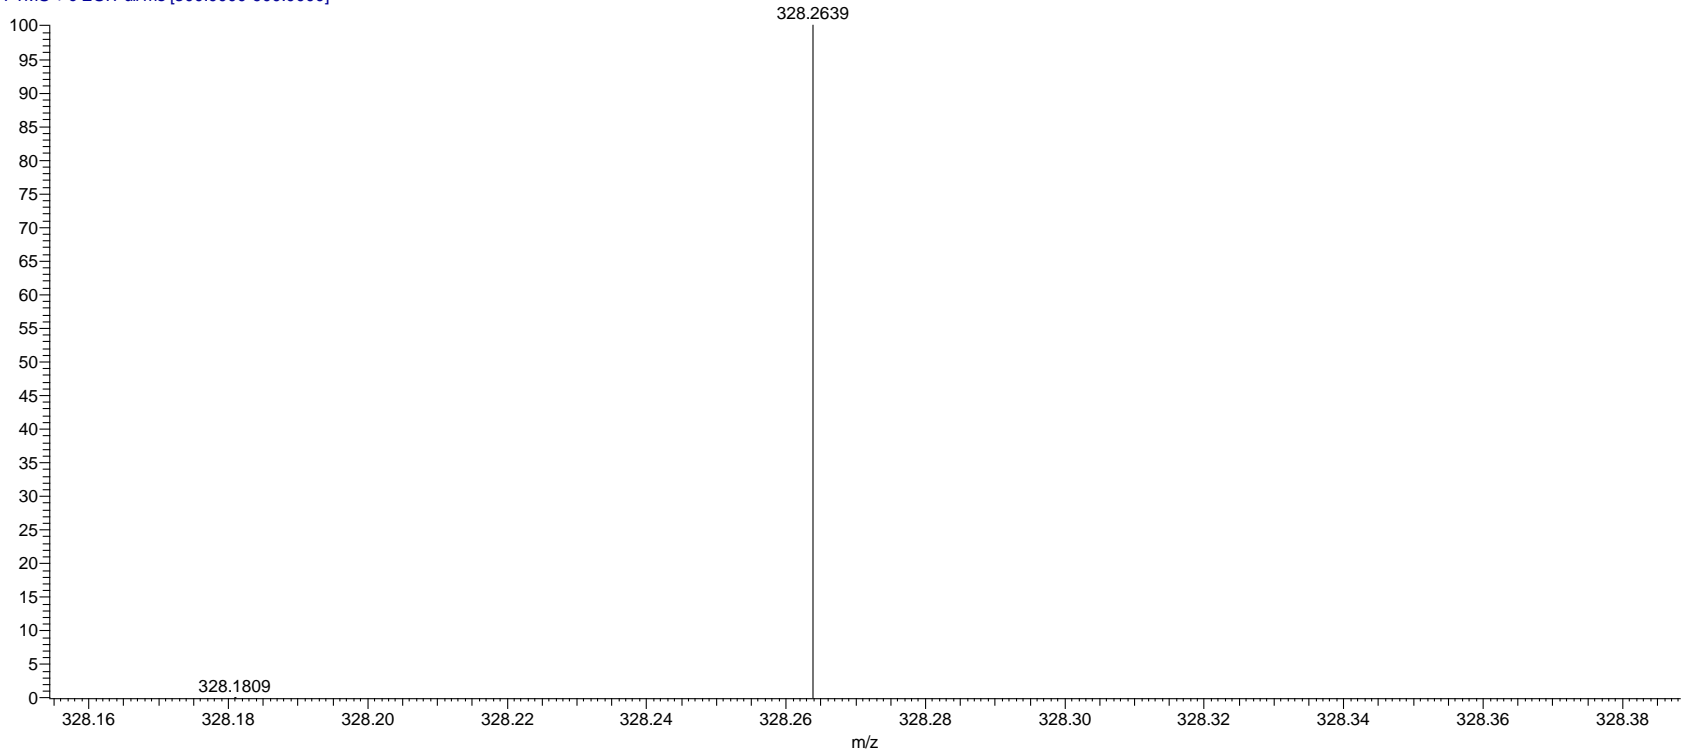

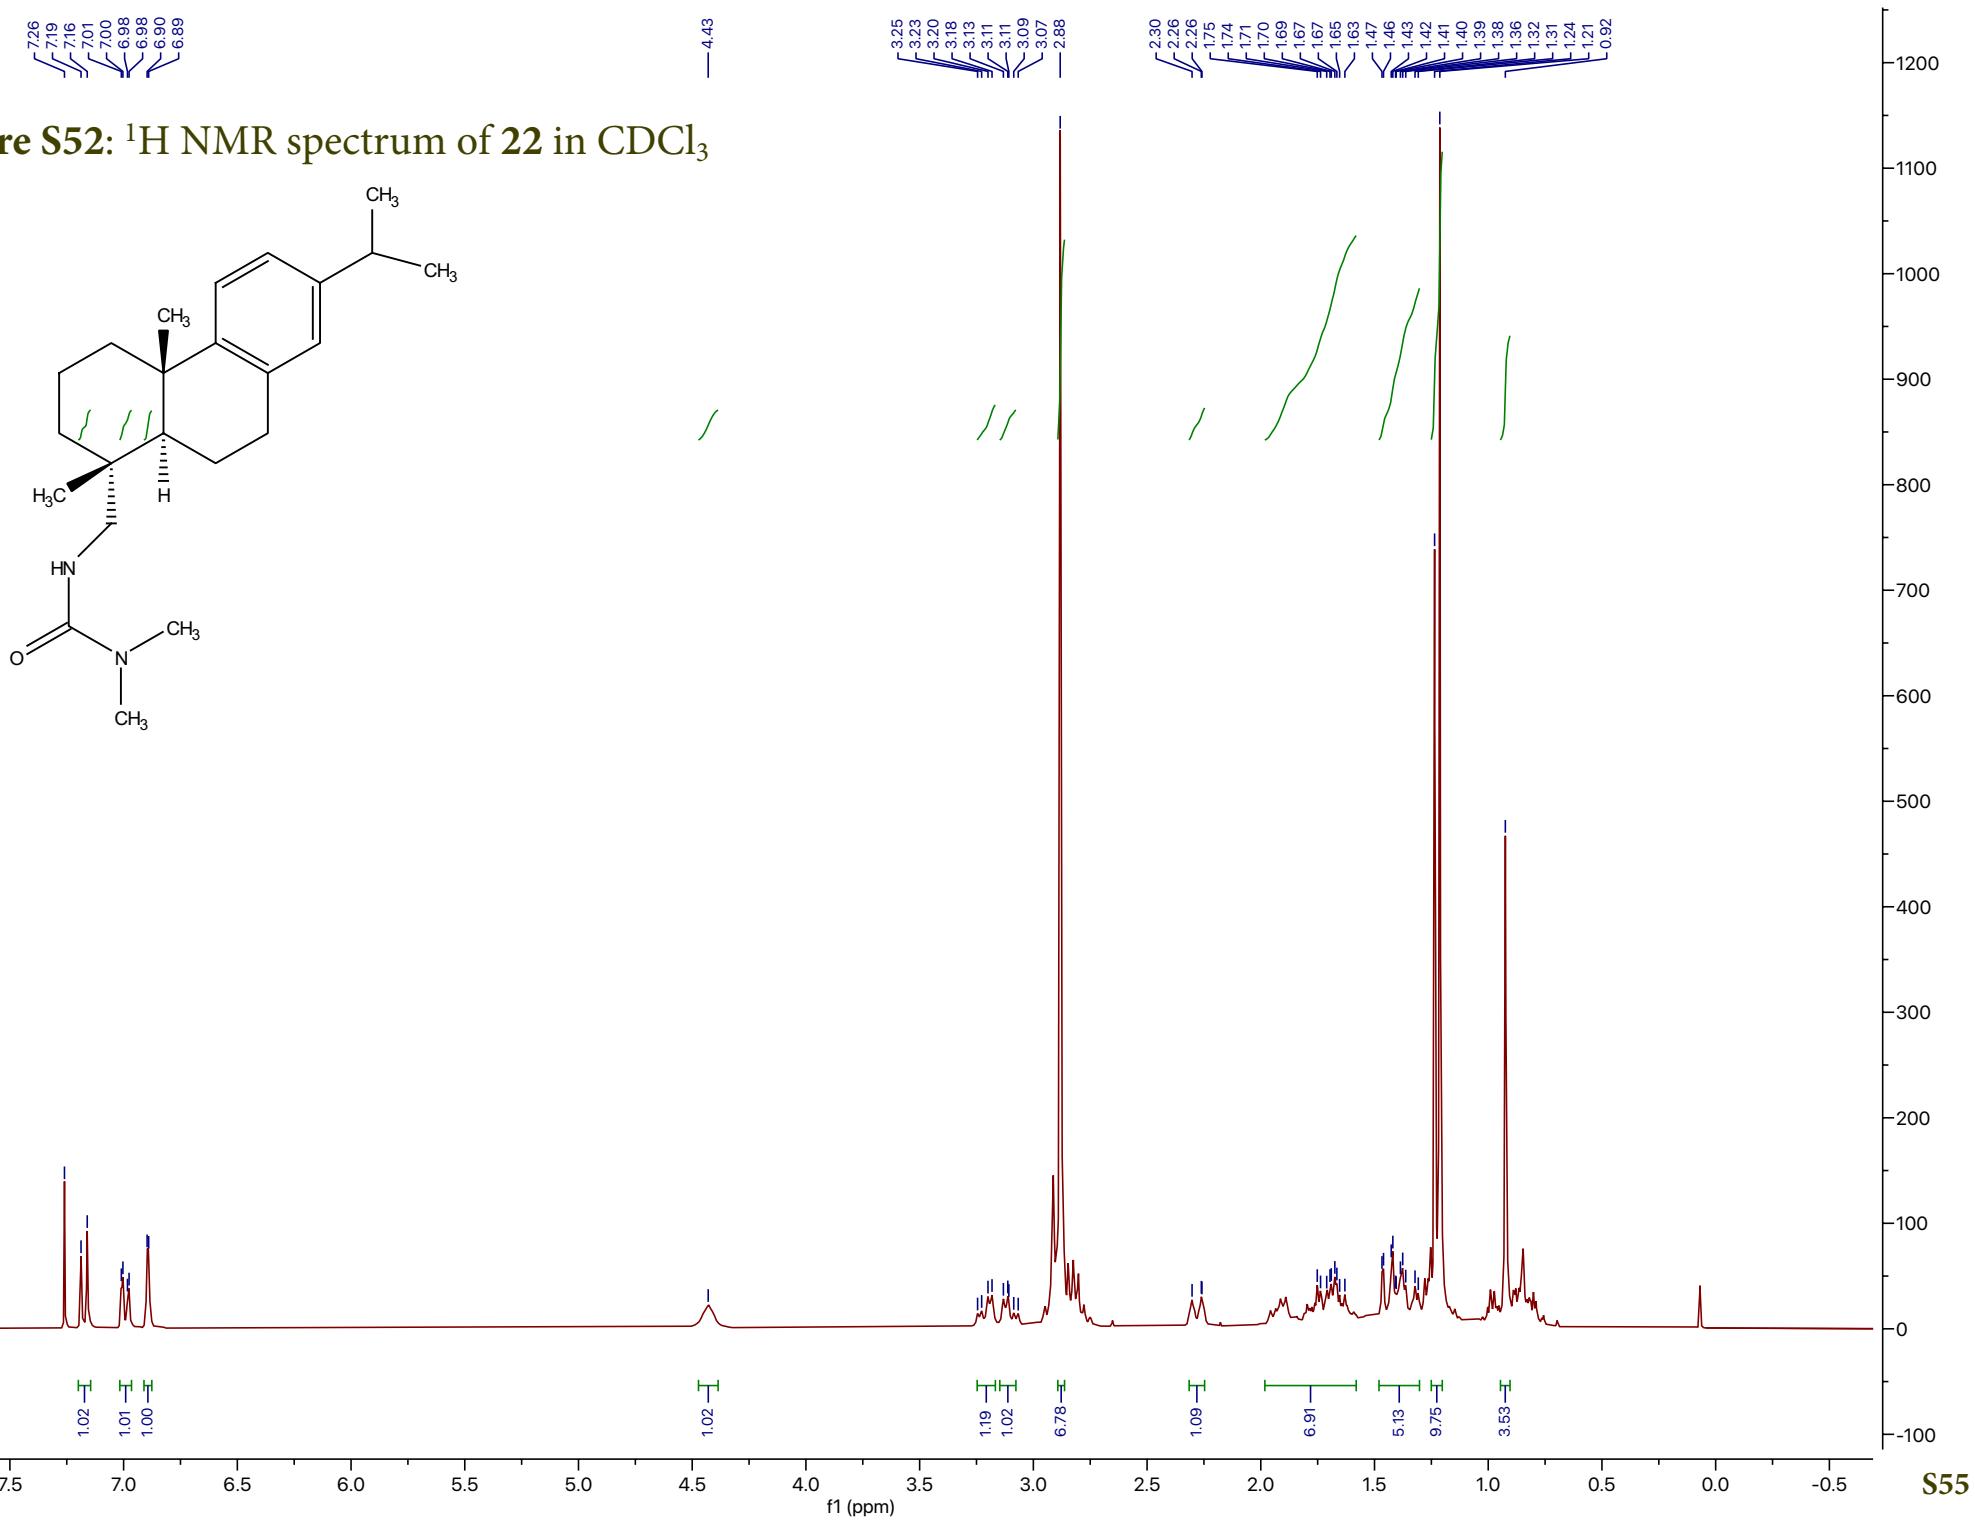

**Figure S53:**  $^{13}\text{C}$  NMR spectrum of **22** in  $\text{CDCl}_3$ 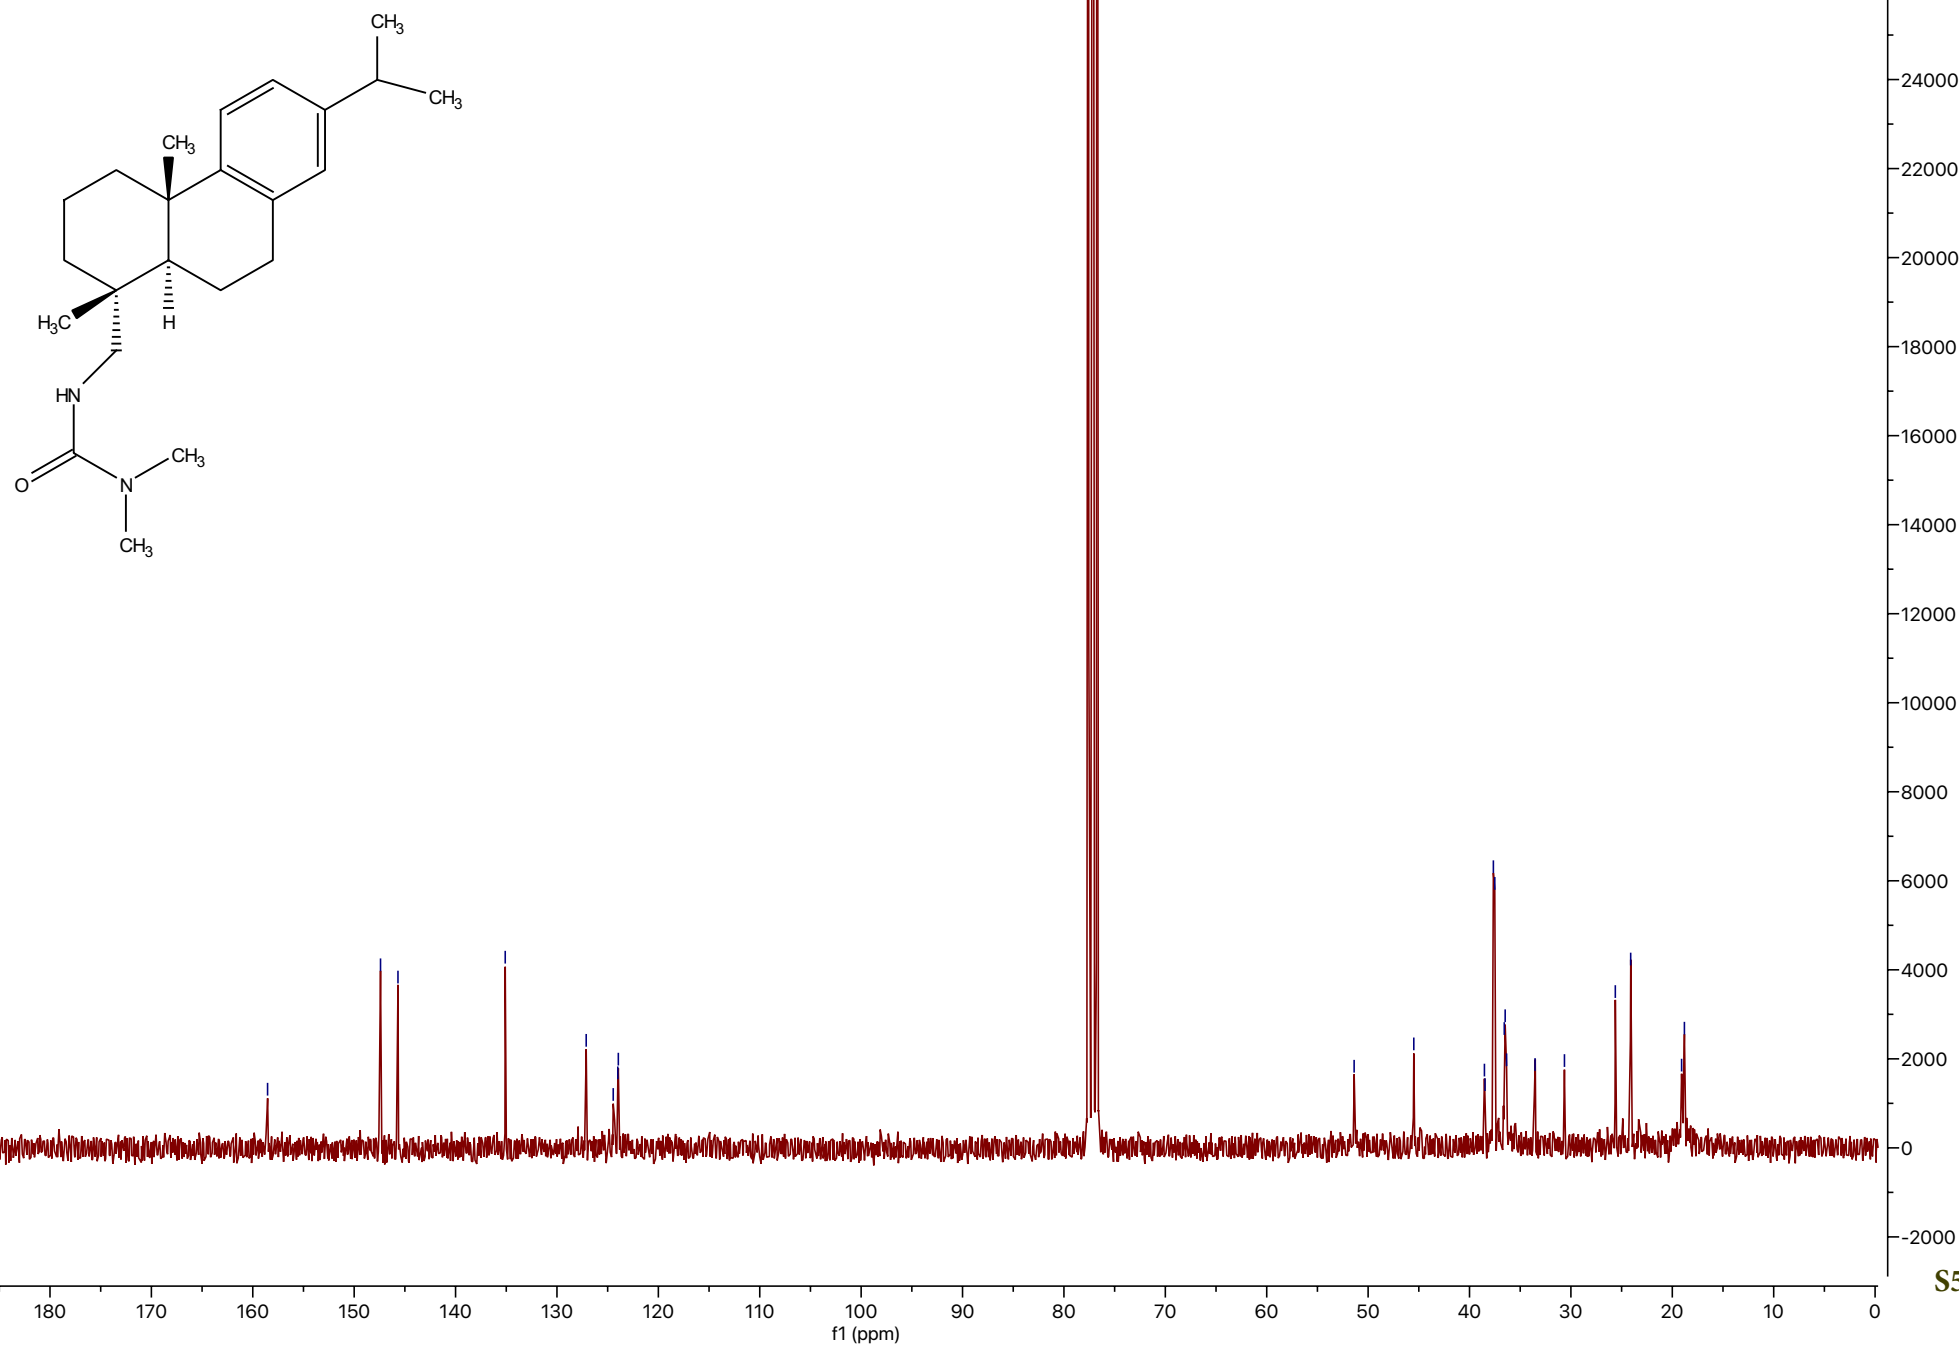



**Figure S54:** High resolution mass spectrum of **22**

| Sample Name              | Mol Fomula | MW       | M+H      | observed | delta   | ppm   |
|--------------------------|------------|----------|----------|----------|---------|-------|
| IS-78-163-3(IS-78-163-2) | C23H36N2O  | 356.2828 | 357.2906 | 357.2902 | -0.0004 | -1.04 |

IS-78-163-2 #3608-3686 RT: 18.90-19.32 AV: 79 NL: 4.61E7  
T: FTMS + c NSI Full ms [100.0000-1000.0000]

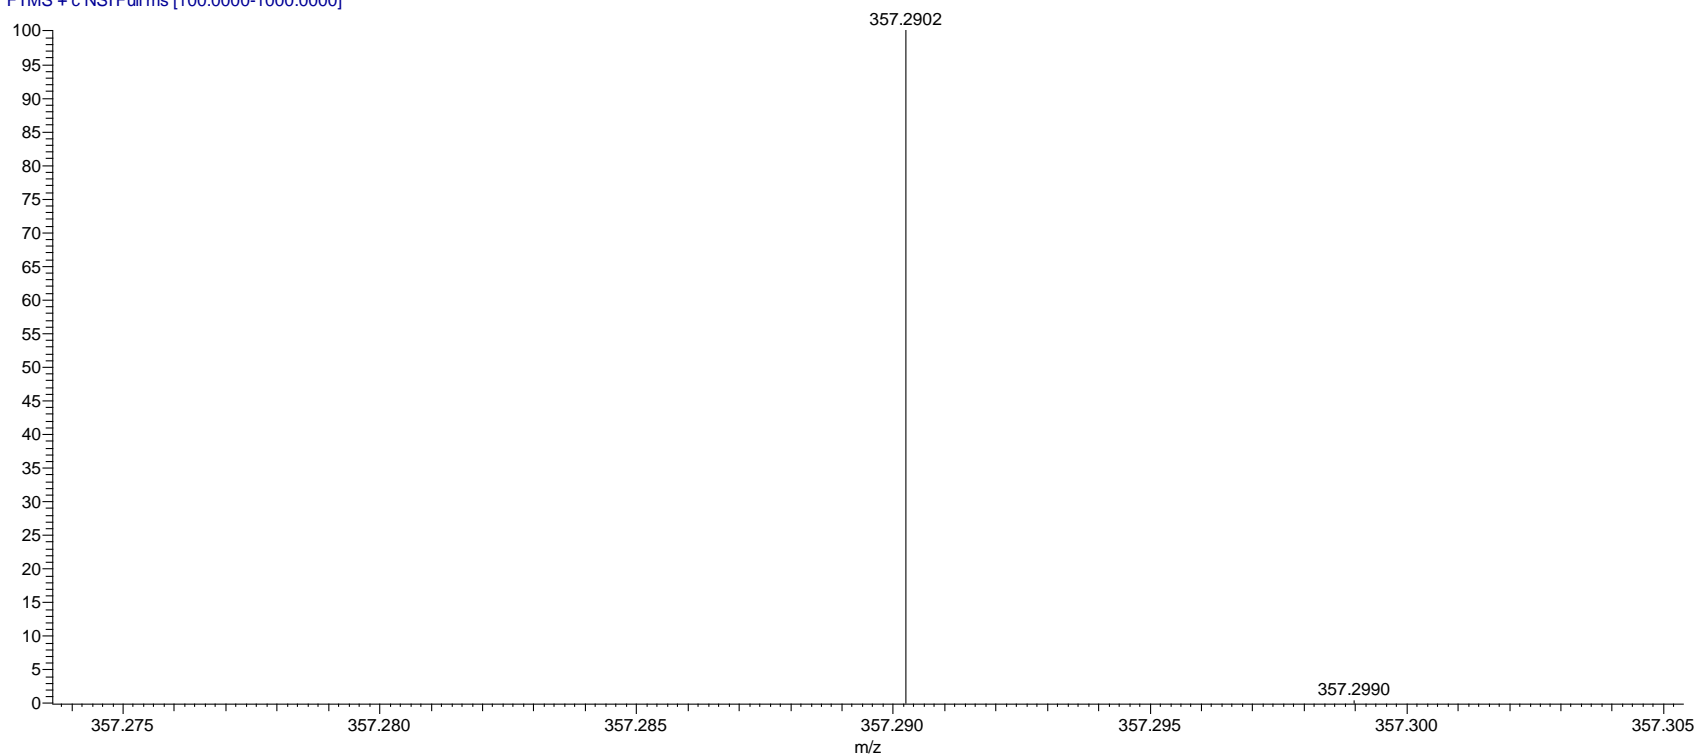

7.33  
7.32  
7.32  
7.26  
7.19  
7.16  
7.12  
7.11  
7.11  
7.10  
7.10  
7.01  
7.00  
6.98  
6.89  
6.89

6.10

3.46  
3.44  
3.42  
3.40  
3.36  
3.33  
3.31  
3.29  
2.92  
2.90  
2.89  
2.87  
2.85  
2.84  
2.83  
2.82  
2.80  
2.77  
2.341.99  
1.97  
1.80  
1.78  
1.77  
1.75  
1.74  
1.73  
1.71  
1.70  
1.69  
1.68  
1.52  
1.51  
1.47  
1.40  
1.39  
1.37  
1.35  
1.26  
1.24  
1.23  
1.21  
1.01**Figure S55:**  $^1\text{H}$  NMR spectrum of **23** in  $\text{CDCl}_3$ 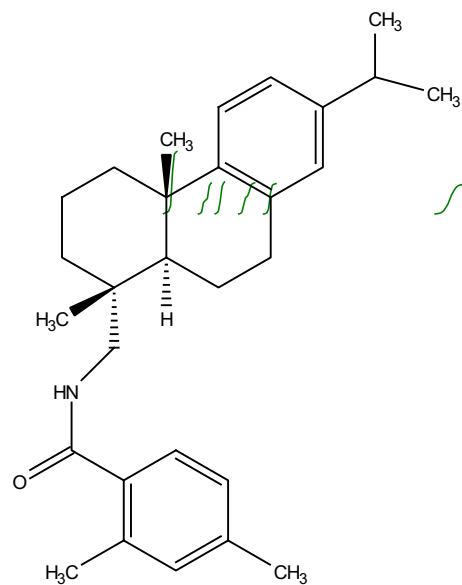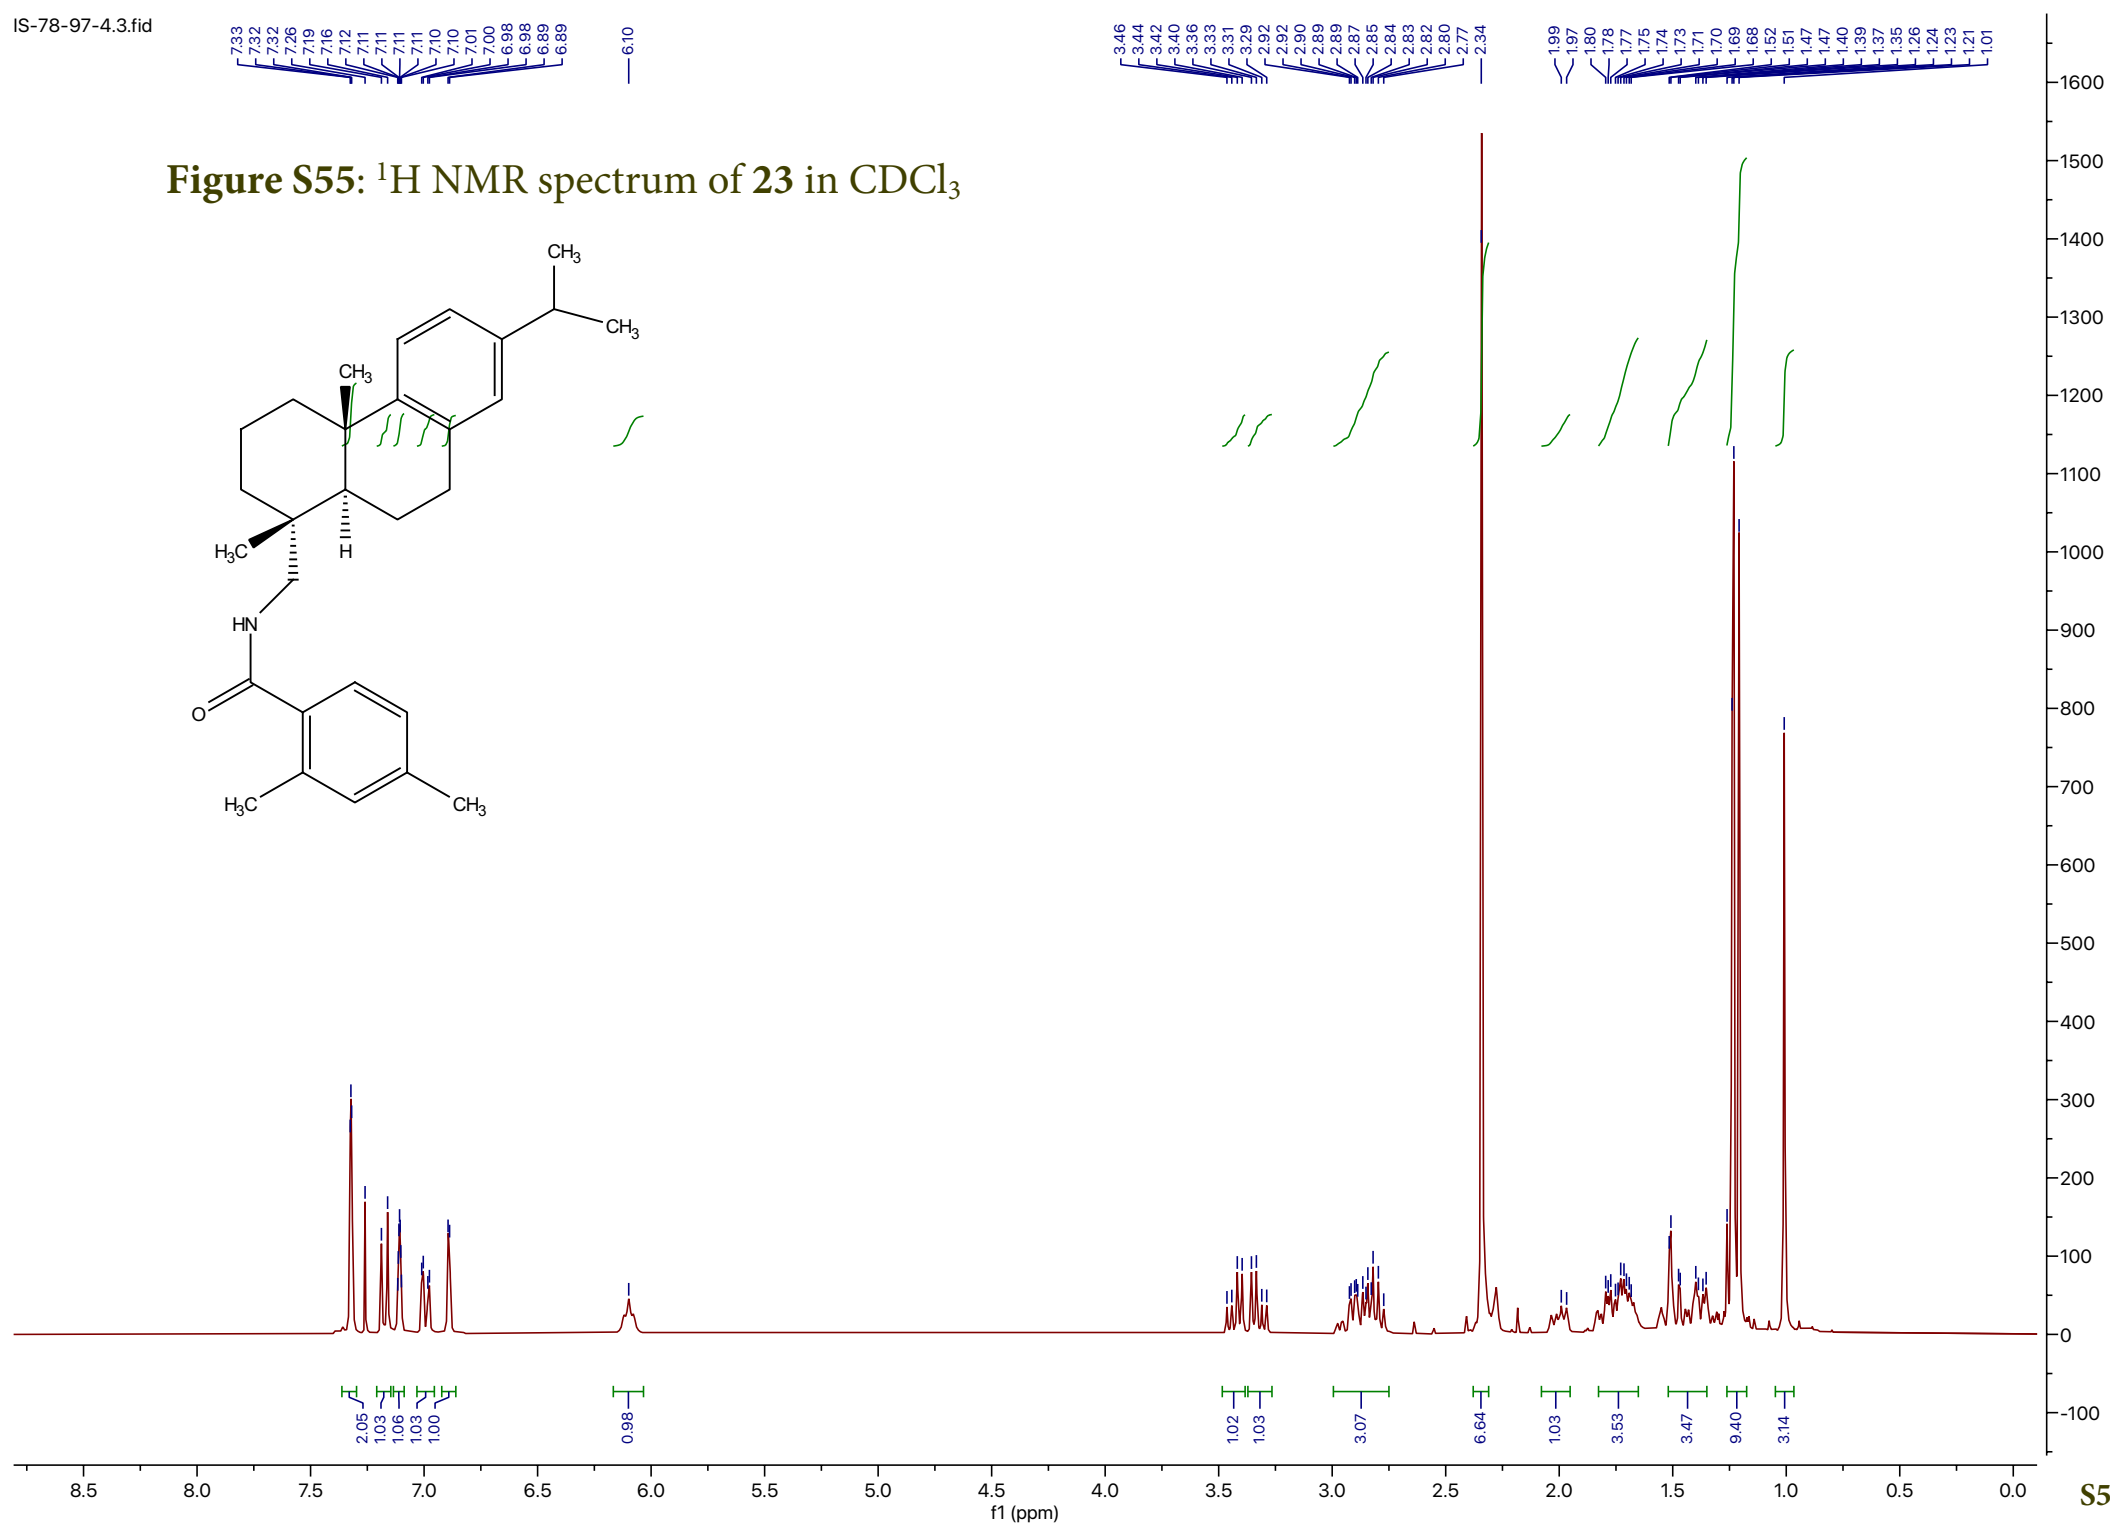

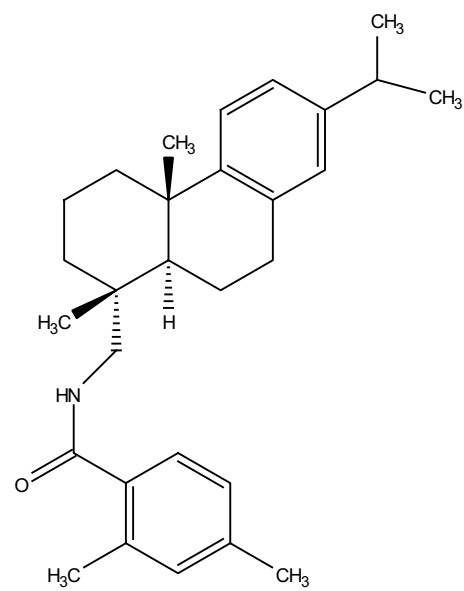

**Figure S56:**  $^{13}\text{C}$  NMR spectrum of **23** in  $\text{CDCl}_3$

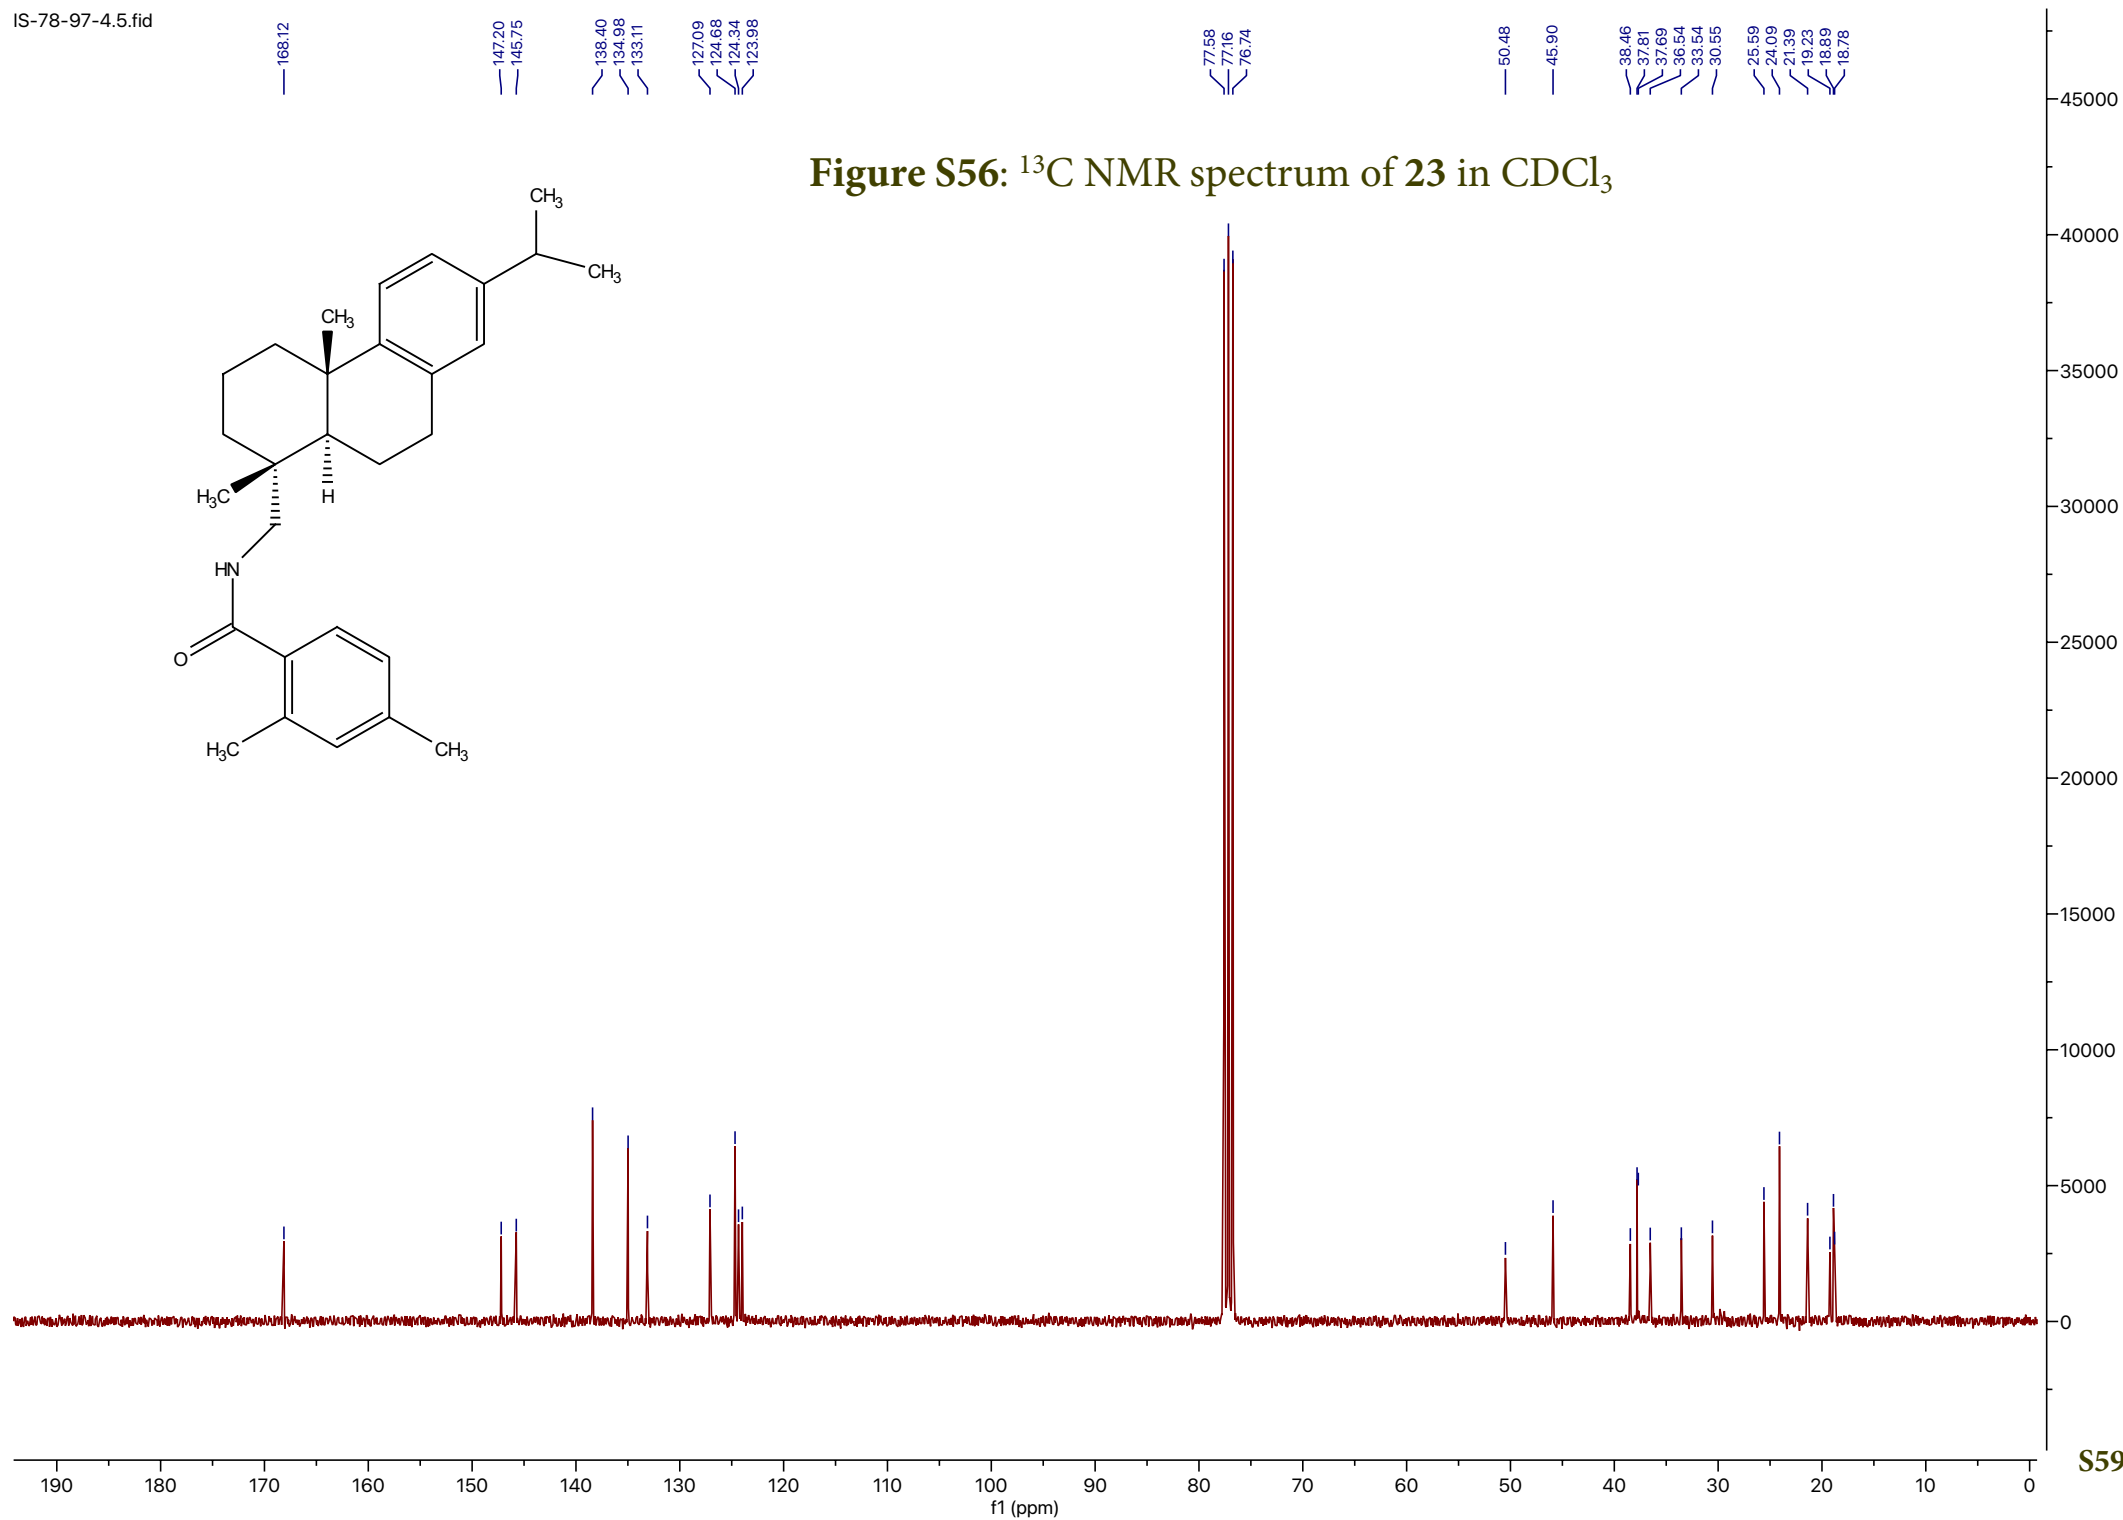

Figure S57: High resoluton mass spectrum of 23

| Sample Name | Mol Fomula | MW(COME WITH SAMPLES) | MW(CALCULATED) | M+H      | observed | delta   | ppm   |
|-------------|------------|-----------------------|----------------|----------|----------|---------|-------|
| IS-78-97    | C29H39NO   | 417.3032              | 417.3032       | 418.3110 | 418.3109 | -0.0001 | -0.17 |

IS-78-97 #600-612 RT: 3.88-3.94 AV: 13 NL: 7.20E5  
T: FTMS + c ESI Full ms [300.0000-900.0000]

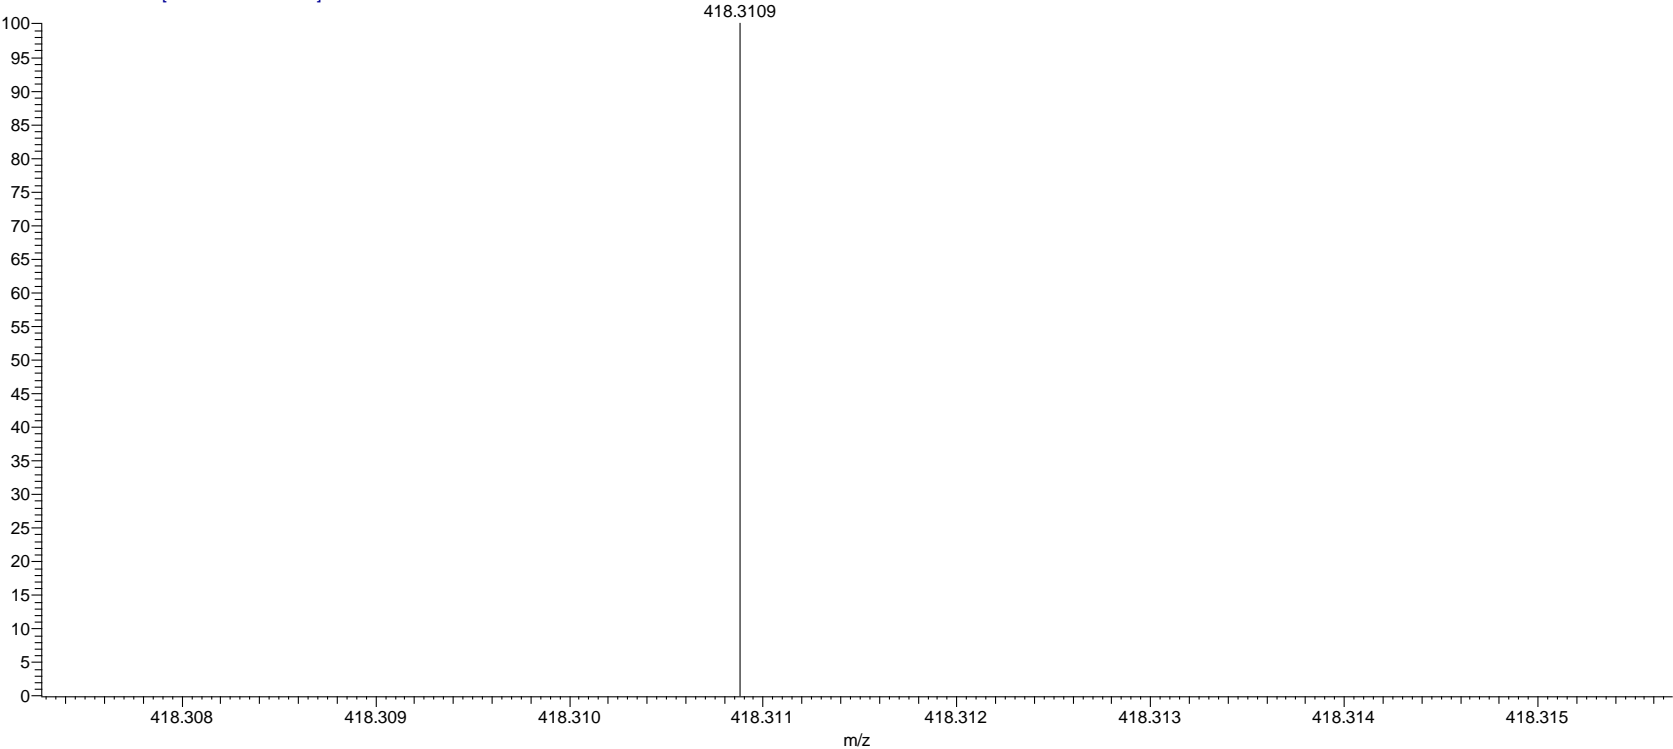

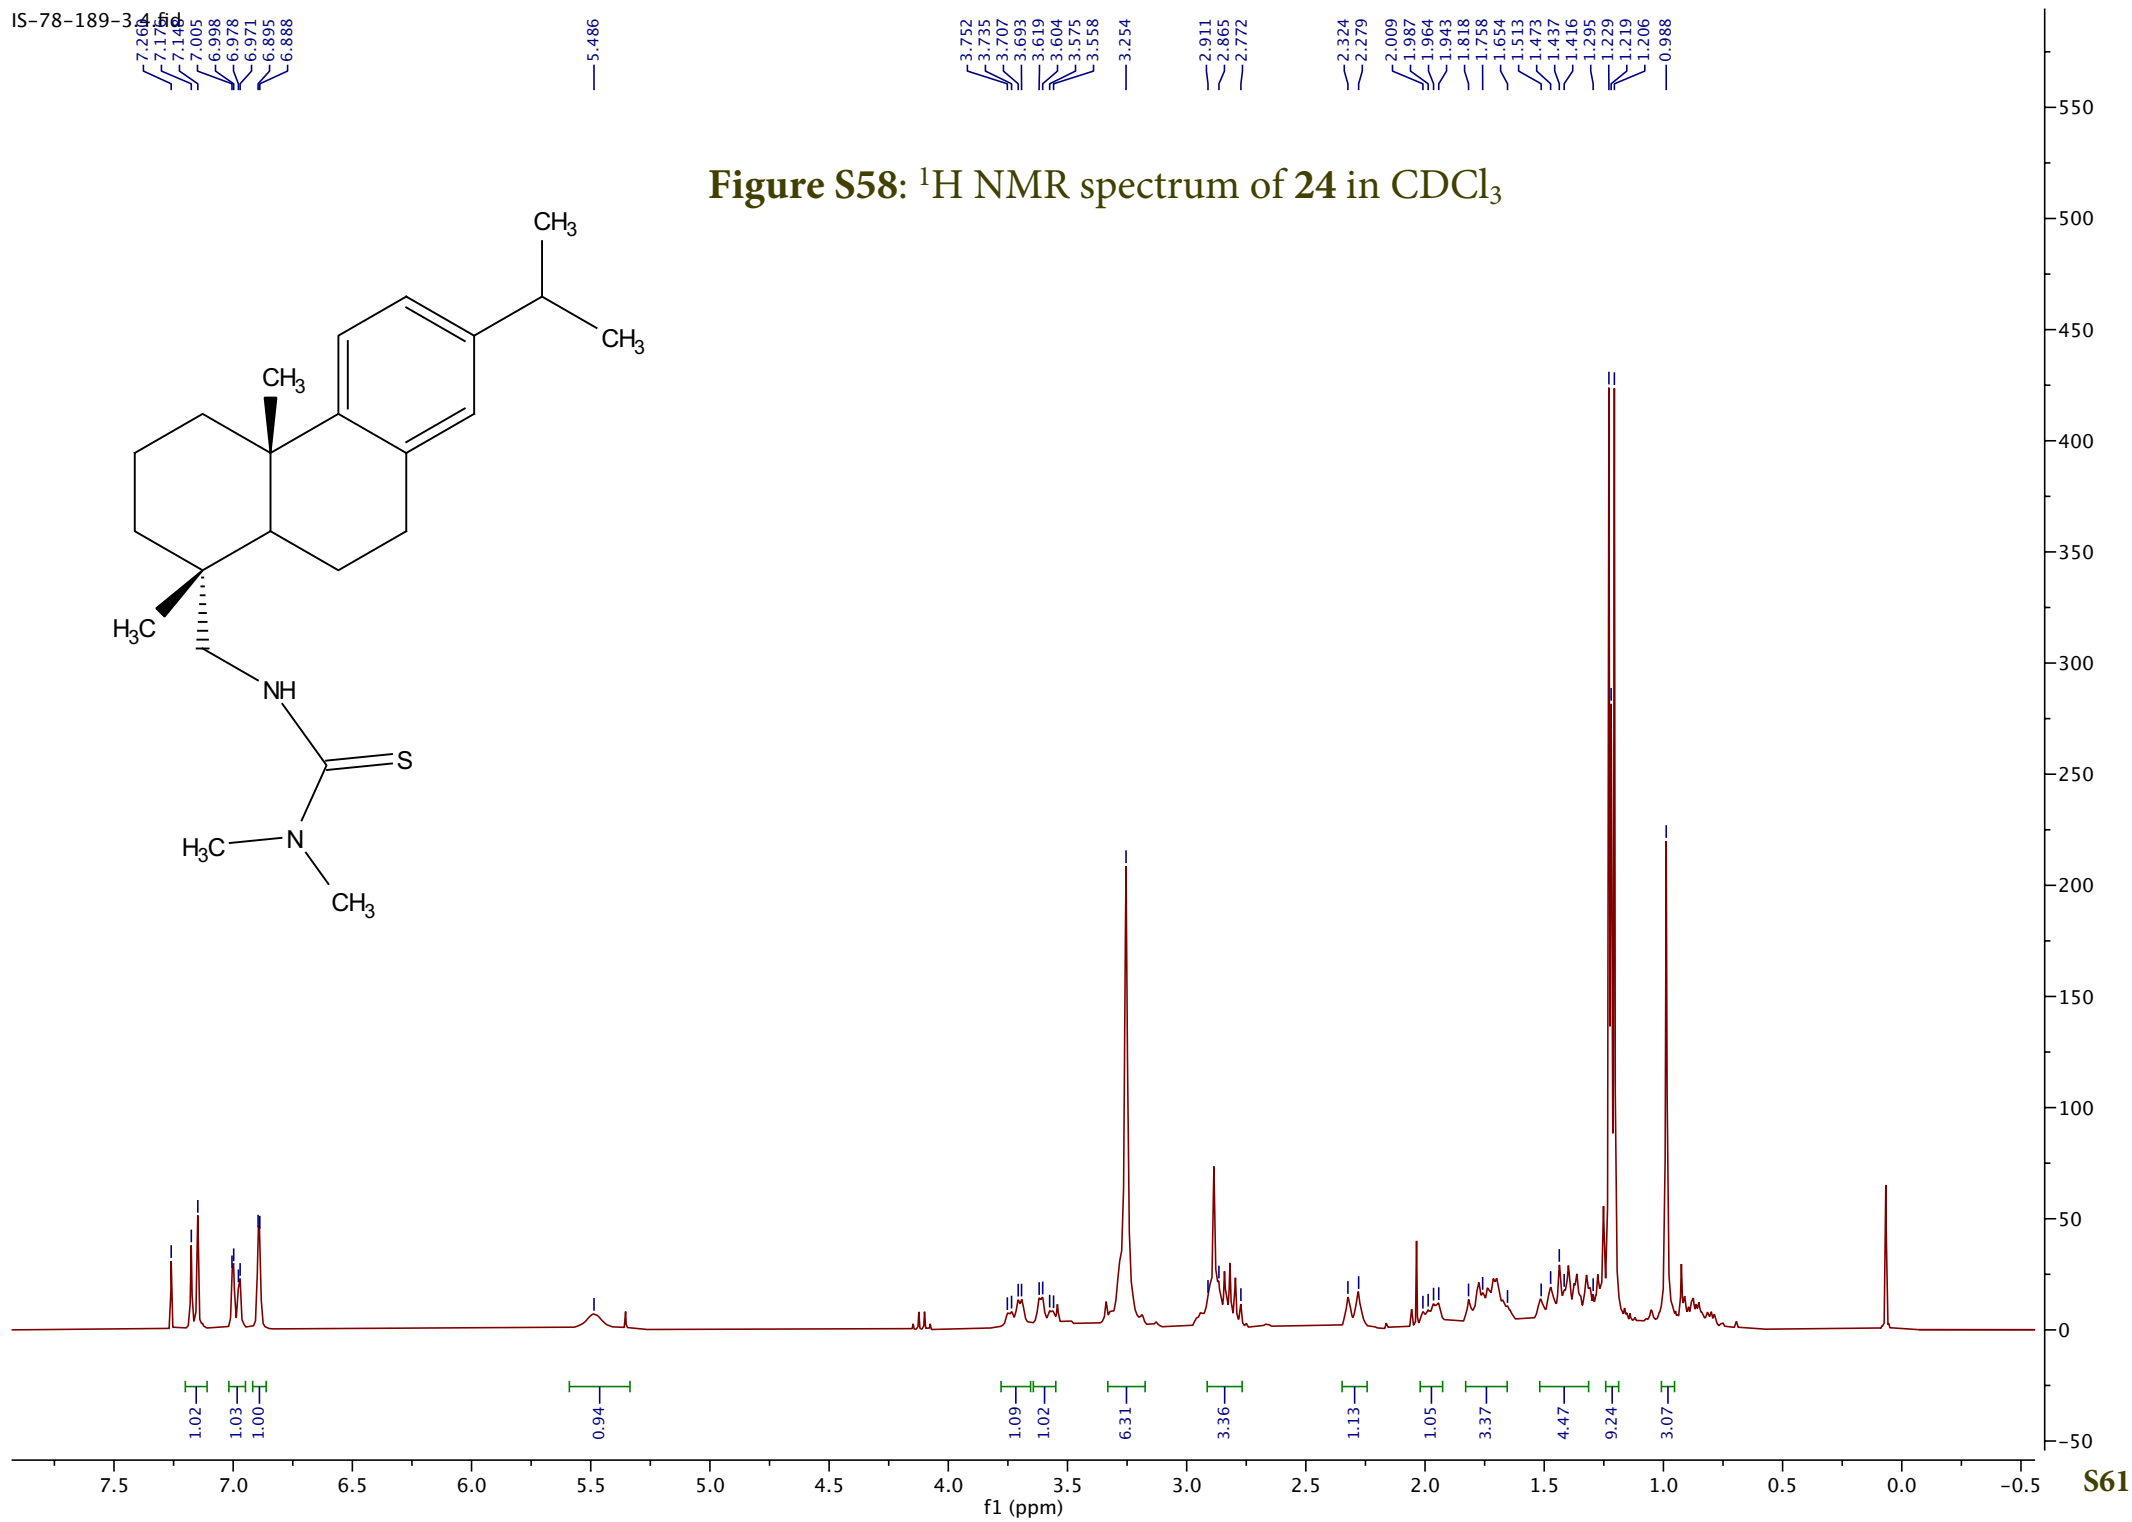

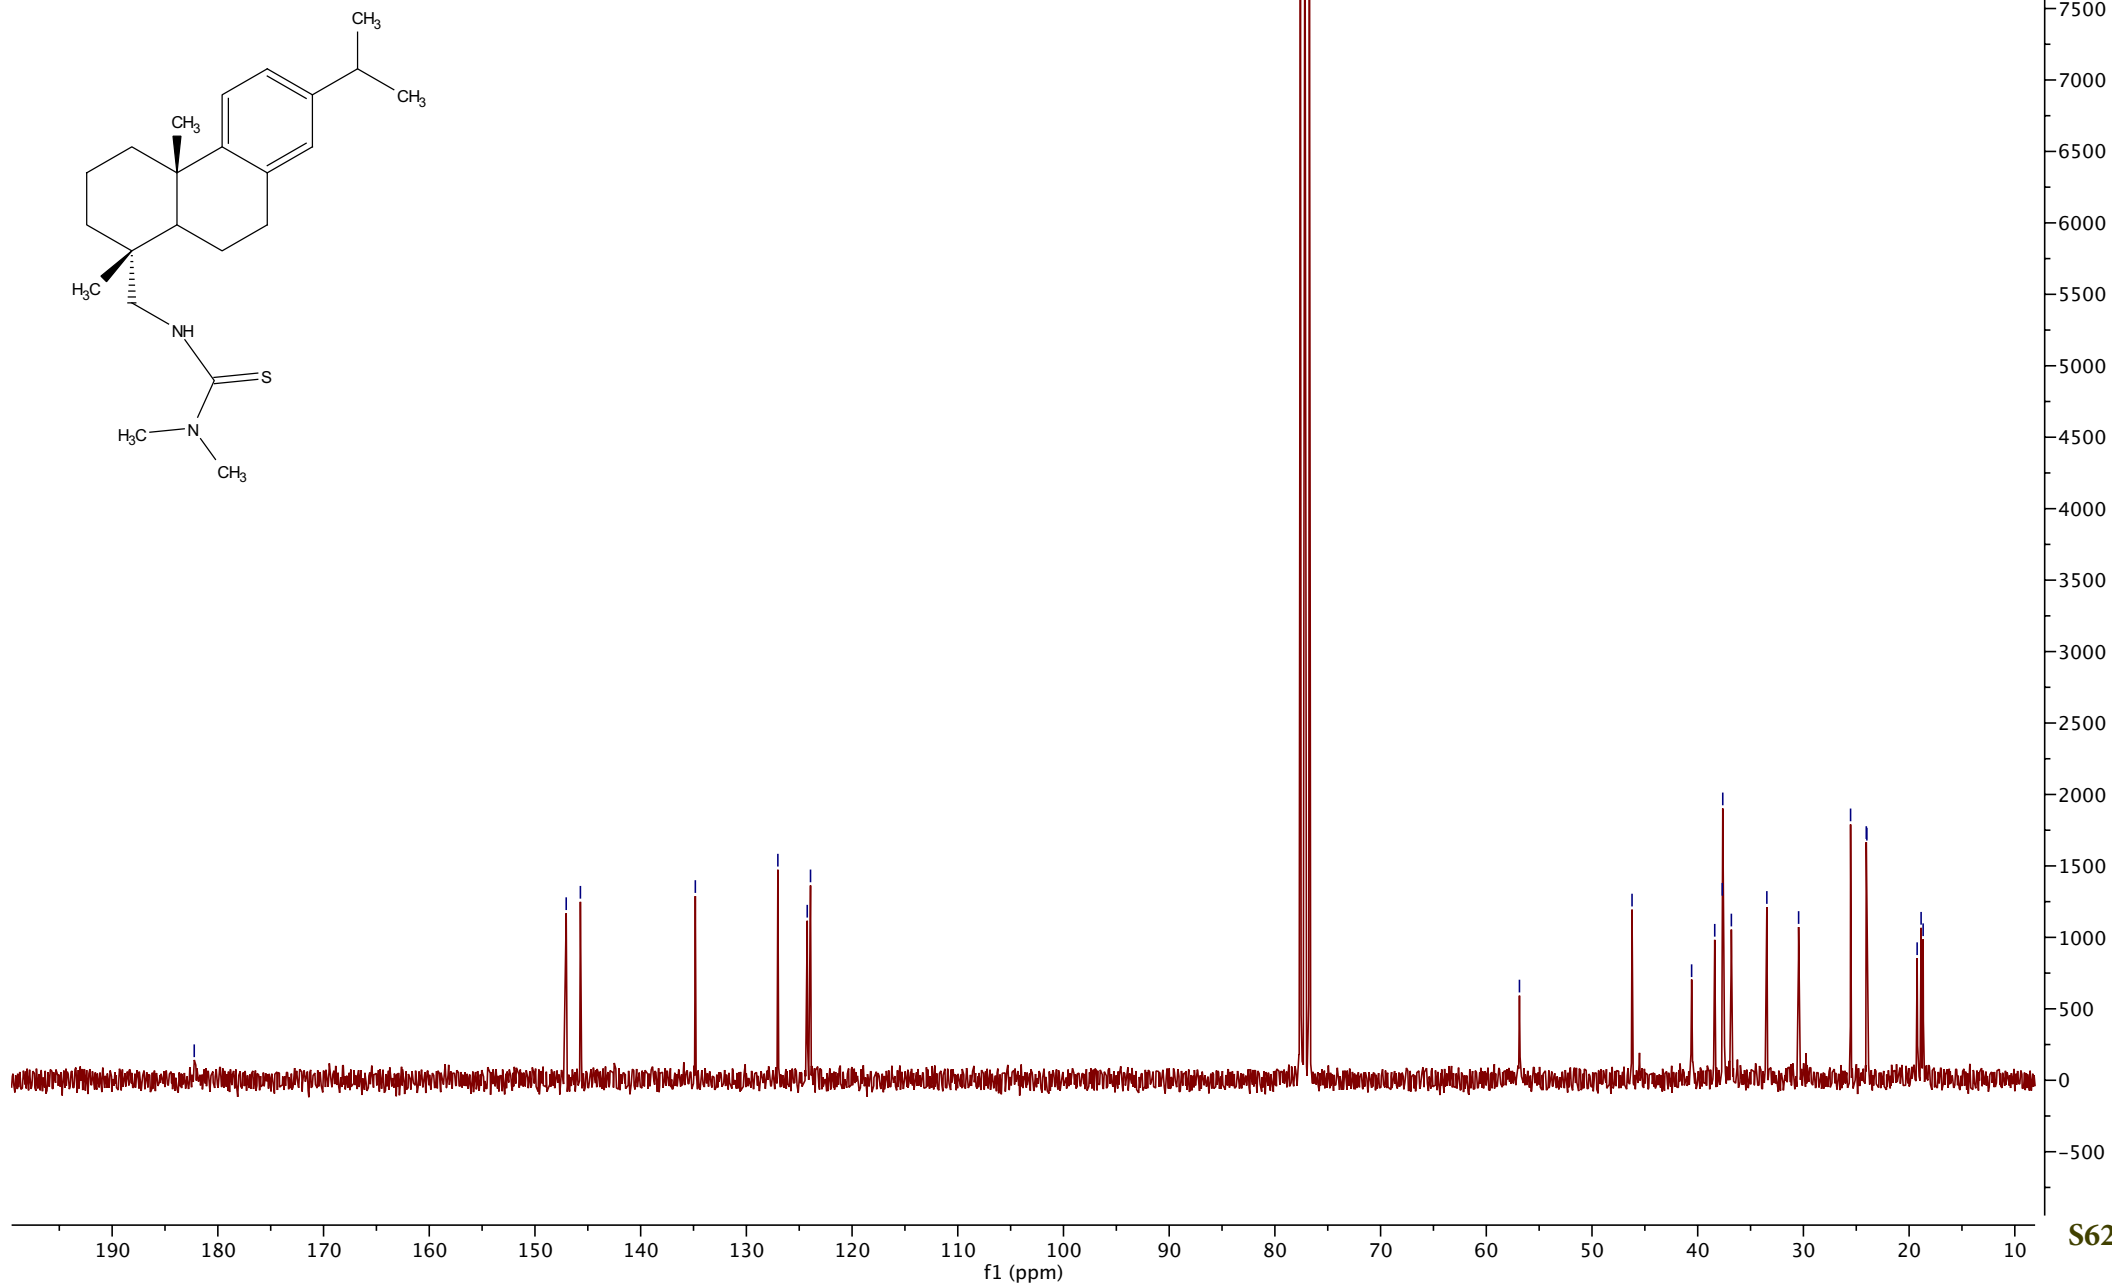

**Figure S60:** High resolution mass spectrum of **24**

| Sample Name | Mol Fomula | MW       | M+H      | observed | delta   | ppm   |
|-------------|------------|----------|----------|----------|---------|-------|
| IS-78-189-3 | C23H36N2S  | 372.2599 | 373.2677 | 373.2675 | -0.0002 | -0.59 |

IS-189-3 #1979-2077 RT: 10.52-11.03 AV: 99 NL: 2.13E7  
T: FTMS + c NSI Full ms [100.0000-1000.0000]

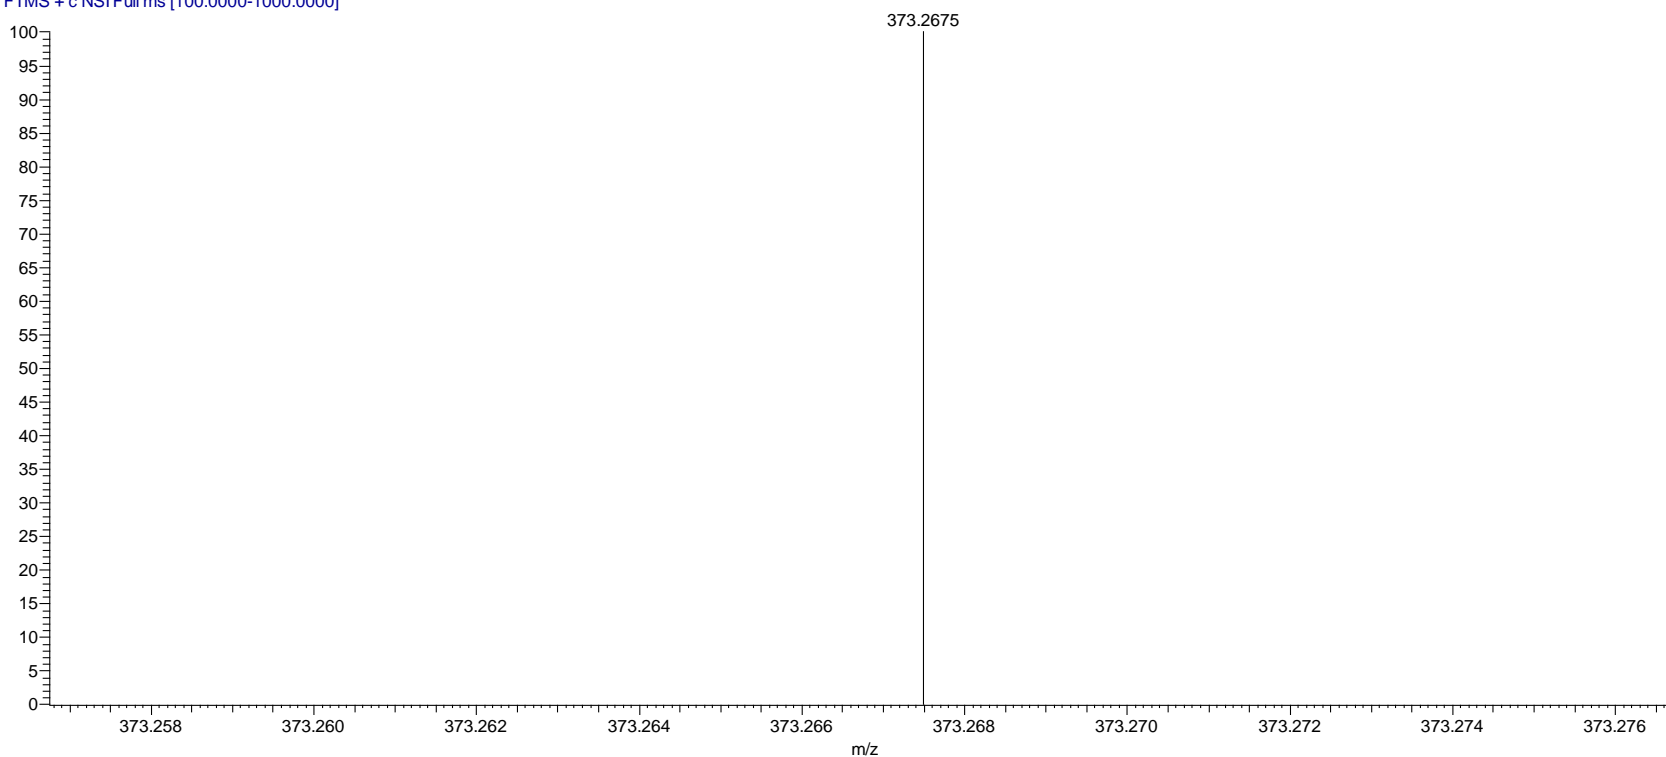

Supplement: s1 [file s1]
